# Supplementary material for: Improving the annotation of the Heterorhabditis bacteriophora genome
Source: PubMed Central journal article supplement (PMC5906903; doi:10.1093/gigascience/giy034), 2018-04-02

|                                                                               |                                                                                                                                                                                                                                                                                                                                                                                                                                                                                                                                                                                                                                                                                                                                                                                                                                                                                                                                                                                                                                                                                                                                                                                                                                                                                                                                                                                                                                                                                                                                                                     |                    |
|-------------------------------------------------------------------------------|---------------------------------------------------------------------------------------------------------------------------------------------------------------------------------------------------------------------------------------------------------------------------------------------------------------------------------------------------------------------------------------------------------------------------------------------------------------------------------------------------------------------------------------------------------------------------------------------------------------------------------------------------------------------------------------------------------------------------------------------------------------------------------------------------------------------------------------------------------------------------------------------------------------------------------------------------------------------------------------------------------------------------------------------------------------------------------------------------------------------------------------------------------------------------------------------------------------------------------------------------------------------------------------------------------------------------------------------------------------------------------------------------------------------------------------------------------------------------------------------------------------------------------------------------------------------|--------------------|
| <b>Manuscript Number:</b>                                                     | GIGA-D-17-00297                                                                                                                                                                                                                                                                                                                                                                                                                                                                                                                                                                                                                                                                                                                                                                                                                                                                                                                                                                                                                                                                                                                                                                                                                                                                                                                                                                                                                                                                                                                                                     |                    |
| <b>Full Title:</b>                                                            | Improving the annotation of the Heterorhabditis bacteriophora genome                                                                                                                                                                                                                                                                                                                                                                                                                                                                                                                                                                                                                                                                                                                                                                                                                                                                                                                                                                                                                                                                                                                                                                                                                                                                                                                                                                                                                                                                                                |                    |
| <b>Article Type:</b>                                                          | Research                                                                                                                                                                                                                                                                                                                                                                                                                                                                                                                                                                                                                                                                                                                                                                                                                                                                                                                                                                                                                                                                                                                                                                                                                                                                                                                                                                                                                                                                                                                                                            |                    |
| <b>Funding Information:</b>                                                   | Wellcome Trust<br>(204052/Z/16/Z)                                                                                                                                                                                                                                                                                                                                                                                                                                                                                                                                                                                                                                                                                                                                                                                                                                                                                                                                                                                                                                                                                                                                                                                                                                                                                                                                                                                                                                                                                                                                   | Dr Florence McLean |
| <b>Abstract:</b>                                                              | <p>Genome assembly and annotation remains an exacting task. As the tools available for these tasks improve, it is useful to return to data produced with earlier instances to assess their credibility and correctness. The entomopathogenic nematode Heterorhabditis bacteriophora is widely used to control insect pests in horticulture. The genome sequence for this species was reported to encode an unusually high proportion of unique proteins and a paucity of secreted proteins compared to other related nematodes. We revisited the H. bacteriophora genome assembly and gene predictions to ask whether these unusual characteristics were biological or methodological in origin. We mapped an independent resequencing dataset to the genome and used the blobtools pipeline to identify potential contaminants. While present (0.2% of the genome span, 0.4% of predicted proteins), assembly contamination was not significant. Re-prediction of the gene set using BRAKER1 and published transcriptome data generated a predicted proteome that was very different from the published one. The new gene set had a much reduced complement of unique proteins, better completeness values that were in line with other related species' genomes, and an increased number of proteins predicted to be secreted. It is thus likely that methodological issues drove the apparent uniqueness of the initial H. bacteriophora genome annotation and that similar contamination and misannotation issues affect other published genome assemblies.</p> |                    |
| <b>Corresponding Author:</b>                                                  | Florence McLean, BM BCh, MSc(R)<br>University of Edinburgh<br>Edinburgh, UNITED KINGDOM                                                                                                                                                                                                                                                                                                                                                                                                                                                                                                                                                                                                                                                                                                                                                                                                                                                                                                                                                                                                                                                                                                                                                                                                                                                                                                                                                                                                                                                                             |                    |
| <b>Corresponding Author Secondary Information:</b>                            |                                                                                                                                                                                                                                                                                                                                                                                                                                                                                                                                                                                                                                                                                                                                                                                                                                                                                                                                                                                                                                                                                                                                                                                                                                                                                                                                                                                                                                                                                                                                                                     |                    |
| <b>Corresponding Author's Institution:</b>                                    | University of Edinburgh                                                                                                                                                                                                                                                                                                                                                                                                                                                                                                                                                                                                                                                                                                                                                                                                                                                                                                                                                                                                                                                                                                                                                                                                                                                                                                                                                                                                                                                                                                                                             |                    |
| <b>Corresponding Author's Secondary Institution:</b>                          |                                                                                                                                                                                                                                                                                                                                                                                                                                                                                                                                                                                                                                                                                                                                                                                                                                                                                                                                                                                                                                                                                                                                                                                                                                                                                                                                                                                                                                                                                                                                                                     |                    |
| <b>First Author:</b>                                                          | Florence McLean                                                                                                                                                                                                                                                                                                                                                                                                                                                                                                                                                                                                                                                                                                                                                                                                                                                                                                                                                                                                                                                                                                                                                                                                                                                                                                                                                                                                                                                                                                                                                     |                    |
| <b>First Author Secondary Information:</b>                                    |                                                                                                                                                                                                                                                                                                                                                                                                                                                                                                                                                                                                                                                                                                                                                                                                                                                                                                                                                                                                                                                                                                                                                                                                                                                                                                                                                                                                                                                                                                                                                                     |                    |
| <b>Order of Authors:</b>                                                      | Florence McLean<br>Duncan Berger<br>Dominik R Laetsch<br>Hillel T Schwartz<br>Mark Blaxter                                                                                                                                                                                                                                                                                                                                                                                                                                                                                                                                                                                                                                                                                                                                                                                                                                                                                                                                                                                                                                                                                                                                                                                                                                                                                                                                                                                                                                                                          |                    |
| <b>Order of Authors Secondary Information:</b>                                |                                                                                                                                                                                                                                                                                                                                                                                                                                                                                                                                                                                                                                                                                                                                                                                                                                                                                                                                                                                                                                                                                                                                                                                                                                                                                                                                                                                                                                                                                                                                                                     |                    |
| <b>Opposed Reviewers:</b>                                                     |                                                                                                                                                                                                                                                                                                                                                                                                                                                                                                                                                                                                                                                                                                                                                                                                                                                                                                                                                                                                                                                                                                                                                                                                                                                                                                                                                                                                                                                                                                                                                                     |                    |
| <b>Additional Information:</b>                                                |                                                                                                                                                                                                                                                                                                                                                                                                                                                                                                                                                                                                                                                                                                                                                                                                                                                                                                                                                                                                                                                                                                                                                                                                                                                                                                                                                                                                                                                                                                                                                                     |                    |
| <b>Question</b>                                                               | <b>Response</b>                                                                                                                                                                                                                                                                                                                                                                                                                                                                                                                                                                                                                                                                                                                                                                                                                                                                                                                                                                                                                                                                                                                                                                                                                                                                                                                                                                                                                                                                                                                                                     |                    |
| Are you submitting this manuscript to a special series or article collection? | No                                                                                                                                                                                                                                                                                                                                                                                                                                                                                                                                                                                                                                                                                                                                                                                                                                                                                                                                                                                                                                                                                                                                                                                                                                                                                                                                                                                                                                                                                                                                                                  |                    |
| <b>Experimental design and statistics</b>                                     | Yes                                                                                                                                                                                                                                                                                                                                                                                                                                                                                                                                                                                                                                                                                                                                                                                                                                                                                                                                                                                                                                                                                                                                                                                                                                                                                                                                                                                                                                                                                                                                                                 |                    |

|                                                                                                                                                                                                                                                                                                                                                                                                                                                                                                                                                         |            |
|---------------------------------------------------------------------------------------------------------------------------------------------------------------------------------------------------------------------------------------------------------------------------------------------------------------------------------------------------------------------------------------------------------------------------------------------------------------------------------------------------------------------------------------------------------|------------|
| <p>Full details of the experimental design and statistical methods used should be given in the Methods section, as detailed in our <a href="#">Minimum Standards Reporting Checklist</a>. Information essential to interpreting the data presented should be made available in the figure legends.</p> <p>Have you included all the information requested in your manuscript?</p>                                                                                                                                                                       |            |
| <p><b>Resources</b></p> <p>A description of all resources used, including antibodies, cell lines, animals and software tools, with enough information to allow them to be uniquely identified, should be included in the Methods section. Authors are strongly encouraged to cite <a href="#">Research Resource Identifiers</a> (RRIDs) for antibodies, model organisms and tools, where possible.</p> <p>Have you included the information requested as detailed in our <a href="#">Minimum Standards Reporting Checklist</a>?</p>                     | <p>Yes</p> |
| <p><b>Availability of data and materials</b></p> <p>All datasets and code on which the conclusions of the paper rely must be either included in your submission or deposited in <a href="#">publicly available repositories</a> (where available and ethically appropriate), referencing such data using a unique identifier in the references and in the “Availability of Data and Materials” section of your manuscript.</p> <p>Have you have met the above requirement as detailed in our <a href="#">Minimum Standards Reporting Checklist</a>?</p> | <p>Yes</p> |

# Improving the annotation of the *Heterorhabditis bacteriophora* genome

Florence McLean<sup>1</sup>, Duncan Berger<sup>1</sup>, Dominik R. Laetsch<sup>1</sup>, Hillel T. Schwartz<sup>2</sup> and Mark Blaxter<sup>1</sup>

<sup>1</sup> Institute of Evolutionary Biology, University of Edinburgh, Edinburgh EH9 3JT, UK

<sup>2</sup> Division of Biology and Biological Engineering, California Institute of Technology, Pasadena, California, USA

*email addresses and ORCID*

Florence McLean      [f.e.mclean@sms.ed.ac.uk](mailto:f.e.mclean@sms.ed.ac.uk)      0000-0001-8218-4904

Duncan Berger      [duncan.berger@bath.edu](mailto:duncan.berger@bath.edu)      0000-0002-2017-6623

Dominik R. Laetsch      [dominik.laetsch@gmail.com](mailto:dominik.laetsch@gmail.com)      0000-0001-7887-0186

Hillel Schwartz      [hillels@caltech.edu](mailto:hillels@caltech.edu)      0000-0002-3448-8652

Mark Blaxter      [mark.blaxter@ed.ac.uk](mailto:mark.blaxter@ed.ac.uk)      0000-0003-2861-949X

Competing interests: The authors have no competing interests in relation to this manuscript.

30 **Abstract**

31 Genome assembly and annotation remains an exacting task. As the tools available for these  
32 tasks improve, it is useful to return to data produced with earlier instances to assess their  
33 credibility and correctness. The entomopathogenic nematode *Heterorhabditis bacteriophora* is  
34 widely used to control insect pests in horticulture. The genome sequence for this species  
35 was reported to encode an unusually high proportion of unique proteins and a paucity of  
36 secreted proteins compared to other related nematodes. We revisited the *H. bacteriophora*  
37 genome assembly and gene predictions to ask whether these unusual characteristics were  
38 biological or methodological in origin. We mapped an independent resequencing dataset to  
39 the genome and used the blobtools pipeline to identify potential contaminants. While  
40 present (0.2% of the genome span, 0.4% of predicted proteins), assembly contamination was  
41 not significant. Re-prediction of the gene set using BRAKER1 and published transcriptome  
42 data generated a predicted proteome that was very different from the published one. The  
43 new gene set had a much reduced complement of unique proteins, better completeness  
44 values that were in line with other related species' genomes, and an increased number of  
45 proteins predicted to be secreted. It is thus likely that methodological issues drove the  
46 apparent uniqueness of the initial *H. bacteriophora* genome annotation and that similar  
47 contamination and misannotation issues affect other published genome assemblies.

48

49

50

51

52

## 53 Introduction

54 The sequencing and annotation of a species' genome is often but the first step in exploiting  
55 these data for comprehensive biological understanding. As with all scientific endeavour,  
56 genome sequencing technologies and the bioinformatics toolkits available for assembly and  
57 annotation are being continually improved. It should come as no surprise therefore that first  
58 estimates of genome sequences and descriptions of the genes they contain can be improved.  
59 For example, the genome of the nematode *Caenorhabditis elegans* was the first animal  
60 genome to be sequenced [1]. The genome sequence and annotations have been updated  
61 many times since, as further exploration of this model organism revealed errors in original  
62 predictions, such that today, with release WS260 (<http://www.wormbase.org/>) [2], very few  
63 of the 19099 protein coding genes announced in the original publication [1] retain their  
64 original structure and sequence. The richness of the annotation of *C. elegans* is driven by the  
65 size of the research community that uses this model species. However for most species,  
66 where the community using the genome data is small or less-well funded, initial genome  
67 sequences and gene predictions are not usually updated.

68 *Heterorhabditis bacteriophora* is an entomopathogenic nematode which maintains a mutualistic  
69 association with the bacterium *Photorhabdus luminescens*. Unlike many other parasitic  
70 nematodes, it is amenable to *in vitro* culture [3] and is therefore of interest not only to  
71 evolutionary and molecular biologists investigating parasitic and symbiotic systems, but also  
72 to those concerned with the biological control of insect pests [4, 5]. *P. luminescens* colonises  
73 the anterior intestine of the free-living infective juvenile stage (Ij). Ijs are attracted to insect  
74 prey by chemical signals [6, 7]. On contacting a host, the Ijs invade the insect's haemocoel  
75 and actively regurgitate *P. luminescens* into the haemolymph. The bacterial infection rapidly  
76 kills the insect, and *H. bacteriophora* grow and reproduce within the cadaver. After 2-3 cycles

1  
2  
3  
4  
5  
6  
7  
8  
9  
10  
11  
12  
13  
14  
15  
16  
17  
18  
19  
20  
21  
22  
23  
24  
25  
26  
27  
28  
29  
30  
31  
32  
33  
34  
35  
36  
37  
38  
39  
40  
41  
42  
43  
44  
45  
46  
47  
48  
49  
50  
51  
52  
53  
54  
55  
56  
57  
58  
59  
60  
61  
62  
63  
64  
65

77 of replication, the nematode progeny develop into IJs, sequester *P. luminescens* and seek out  
78 new insect hosts.

79 Axenic *H. bacteriophora* IJs are unable to develop past the L1 stage [8] , and *H. bacteriophora*  
80 may depend on *P. luminescens* for secondary metabolite provision [9, 10]. Mutation of the  
81 global post-transcriptional regulator Hfq in *P. luminescens* reduced the bacterium's secondary  
82 metabolite production and led to failed nematode development, despite the bacterium  
83 maintaining virulence against host (*Galleria mellonella*) larvae [11]. Together these symbionts  
84 are efficient killers of pest (and other) insects, and understanding of the molecular  
85 mechanisms of host killing could lead to new insecticides.

86 *H. bacteriophora* was selected by the National Human Genome Research Initiative as a  
87 sequencing target [12]. Genomic DNA from axenic cultures of the inbred strain *H.*  
88 *bacteriophora* TTO1 was sequenced using Roche 454 technology and a high quality 77 Mb  
89 draft genome assembly produced [13]. This assembly was predicted (using JIGSAW [14] ) to  
90 encode 21250 proteins. Almost half of these putative proteins had no significant similarity to  
91 entries in the GenBank non-redundant protein database, suggesting an explosion of novelty  
92 in this nematode. The predicted *H. bacteriophora* proteome had fewer orthologues of Kyoto  
93 Encyclopedia of Genes and Genomes loci in the majority of metabolic categories than nine  
94 other nematodes. *H. bacteriophora* was also predicted to have a relative paucity of secreted  
95 proteins compared to free-living nematodes, postulated to reflect a reliance on *P.*  
96 *luminescens* for secreted effectors [13]. The 5.7 Mb genome of *P. luminescens* has also been  
97 sequenced [15]. The *H. bacteriophora* proteome had fewer shared orthologues when  
98 clustered and compared to other rhabditine (Clade V) nematodes (including *Caenorhabditis*  
99 *elegans* and the many animal parasites of the Strongylomorpha) [16].

1  
2  
3  
4  
5  
6  
7  
8  
9  
10  
11  
12  
13  
14  
15  
16  
17  
18  
19  
20  
21  
22  
23  
24  
25  
26  
27  
28  
29  
30  
31  
32  
33  
34  
35  
36  
37  
38  
39  
40  
41  
42  
43  
44  
45  
46  
47  
48  
49  
50  
51  
52  
53  
54  
55  
56  
57  
58  
59  
60  
61  
62  
63  
64  
65

I00 In preliminary analyses we noted that while the genome sequence itself had high  
I01 completeness scores when assessed with the Core Eukaryote Gene Mapping Approach  
I02 (CEGMA) [17] (99.6% complete) and Benchmarking Universal Single-Copy Orthologs  
I03 (BUSCO) [18] (80.9% complete and 5.6% fragmented hits for the BUSCO Eukaryota gene  
I04 set), the predicted proteome scored poorly (47.8% complete and 34.7% fragmented by  
I05 BUSCO; see below). Another unusual feature of the *H. bacteriophora* gene set was the  
I06 proportion of non-canonical splice sites (i.e. those with a 5' GC splice donor site, as  
I07 opposed to the normal 5' GT). Most nematode (and other metazoan) genomes have low  
I08 proportions of non-canonical introns (less than 1%), but the published gene models had over  
I09 9% non-canonical introns. This is more than double the proportion predicted for *Globodera*  
I10 *rostochiensis*, a plant parasitic nematode where the unusually high proportion of non-  
I11 canonical introns was validated *via* manual curation [19].

I12 If these unusual characteristics reflect a truly divergent proteome, the novel proteins in *H.*  
I13 *bacteriophora* may be crucial in its particular symbiotic and parasitic relationships, and of  
I14 great interest to development of improved strains for horticulture. However, it is also  
I15 possible that contamination of the published assembly or annotation artefacts underpin  
I16 these unusual features. We re-examined the *H. bacteriophora* genome and gene predictions,  
I17 and used more recent tools to re-predict protein coding genes from the validated assembly.  
I18 As the BRAKER1 predictions were demonstrably better than the original ones, we explored  
I19 whether some of the unusual characteristics of the published protein set, in particular the  
I20 level of novelty and the proportion of secreted proteins, were supported by the BRAKER1  
I21 protein set.

I22  
I23

## 124 Results

### 125 No evidence for substantial contamination of the *H. bacteriophora* genome assembly

126 We used BlobTools [20] to assess the published genome sequence [13] for potential  
127 contamination. The raw read data from the published assembly was not available on the  
128 trace archive or short read archive (SRA). We thus utilised new Illumina short-read re-  
129 sequencing data generated from strain G2a1223, an inbred derivative of *H. bacteriophora*  
130 strain "Gebre", isolated by Adler Dillman in Moldova. G2a1223 has about 1 single-nucleotide  
131 change per ~2000 nucleotides compared to the originally-sequenced TT01 strain. G2a1223  
132 was grown in culture on the non-colonising bacterium *Photorhabdus temperata*. The majority  
133 of these data (96.3% of the reads) mapped as pairs to the assembly, suggesting completeness  
134 of the published assembly with respect to the new raw read data. In addition, 99.96% of the  
135 published assembly had at least 10-fold coverage from the new raw reads.

136 The assembly was explored using a taxon-annotated GC-coverage plot, with coverage taken  
137 from the new Illumina data and sequence similarity from the NCBI nucleotide database (nt)  
138 (Figure 1). *H. bacteriophora* was excluded from the database search used to annotate the  
139 scaffolds to exclude self hits from the published assembly. All large scaffolds clustered  
140 congruently with respect to read coverage and CG content. A few (57) scaffolds had best  
141 BLASTn matches to phyla other than Nematoda (Table 1). A small amount (5 kb) of likely  
142 remaining *P. luminescens* contamination was noted. We identified 100 kb of the genome of a  
143 strain of the common culture contaminant bacterium *Stenotrophomonas maltophilia* [21].  
144 Contamination of the assembly with *S. maltophilia* was acknowledged [13] but removal of  
145 scaffolds before annotation was not discussed. Two high-coverage scaffolds that derived  
146 from the *H. bacteriophora* mitochondrial genome were annotated as "undefined Eukaryota"  
147 because of taxonomic misclassification in the NCBI nt database. Many scaffolds with



1  
2  
3  
4  
5  
6  
7  
8  
9  
10  
11  
12  
13  
14  
15  
16  
17  
18  
19  
20  
21  
22  
23  
24  
25  
26  
27  
28  
29  
30  
31  
32  
33  
34  
35  
36  
37  
38  
39  
40  
41  
42  
43  
44  
45  
46  
47  
48  
49  
50  
51  
52  
53  
54  
55  
56  
57  
58  
59  
60  
61  
62  
63  
64  
65

148 coverages close to that of the expected nuclear genome had best matches to two  
149 unexpected sources: the platyhelminths *Echinostoma caproni* and *Dicrocoelium dendriticum*, and  
150 several hymenopteran arthropods. Inspection of these matches showed that they were due  
151 to high sequence similarity to a family of *H. bacteriophora* mariner-like transposons [22] and  
152 thus these were classified as *bona fide* nematode nuclear sequences. A group of scaffolds  
153 contained what appears to be a *H. bacteriophora* nuclear repeat with highest similarity to  
154 histone H3.3 sequences from Diptera and Hymenoptera. The remaining scaffolds had low-  
155 scoring nucleotide matches to a variety of chordate, chytrid and arthropod sequences from  
156 deeply conserved genes (tubulin, kinases), but had coverages similar to other nuclear  
157 sequences.

158 Scaffolds with average coverage of less than 10-fold were removed from the assembly (35  
159 scaffolds spanning 132949 bases, 0.2% of the total span; see Supplementary File 1). This  
160 removed all scaffolds aligning to *S. maltophilia* and to *Photorhabdus* spp. (104 kb). The origins  
161 of the additional 28 kb were not investigated. In the published annotation [13], 76 genes  
162 were predicted from these scaffolds.

163

#### 164 **Improved gene predictions are biologically credible and have unexceptional novelty**

165 New gene predictions were generated from a soft-masked version of the filtered assembly  
166 using the RNA-seq based annotation pipeline BRAKER1 [23], generating 16070 protein  
167 predictions from 15747 protein coding genes (see Supplementary File 2). We compared the  
168 soft-masked predictions to those from the published analysis [13] (Figure 2, Table 2). The  
169 predicted proteins from the new BRAKER1/soft-masked gene set were, on average, longer  
170 (Figure 2A). While the average number of introns per gene was the same in the  
171 BRAKER1/soft-masked and published predictions, the BRAKER1/soft-masked gene set had

172 more single-exon genes (Figure 2B). Hard masking of the genome and re-prediction resulted  
173 in fewer single exon genes, suggesting that many of these putative genes could be derived  
174 from repetitive sequence (Supplementary Files 3 and 4), but only 316 of the single exon  
175 genes from the BRAKER1/soft-masked assembly had similarity to transposases or  
176 transposons. The BRAKER1/soft-masked annotations were taken forward for further  
177 analysis.

178 Four-fifths (83.3%) of the published protein-coding gene predictions [13] overlapped to  
179 some extent with the BRAKER1/soft-masked predictions at the genome level, with a mean  
180 of 67% of the nucleotides of each BRAKER1/soft-masked gene covered by a published gene  
181 (Figure 2C). Half (8061) of the 15747 BRAKER1/soft-masked gene predictions had an  
182 overlap proportion of  $\geq 0.9$  with the published predictions. At the level of protein sequence  
183 only 836 proteins were identical between the two predictions, and only 2099 genes had  
184 identical genome start and stop positions.

185 The BRAKER1/soft-masked and published gene sets were checked for completeness using  
186 BUSCO [18], based on the Eukaryota lineage gene set, and *Caenorhabditis* as the species  
187 parameter for orthologue finding. The BRAKER1/soft-masked gene set contained a  
188 substantially higher percentage of complete, and lower percentage of fragmented BUSCO  
189 genes than the published set (Table 2). Two *H. bacteriophora* transcriptome datasets, publicly  
190 available Roche 454 data and Sanger expressed sequence tags, were mapped to the  
191 published and BRAKER1/soft-masked transcriptomes to assess gene set completeness. This  
192 suggested that the BRAKER1/soft-masked transcriptome predictions were more complete  
193 than the original (Table 2).

194 Nearly half (9893/20964; 47.2%) of the published proteins were reported to have no  
195 significant matches in the NCBI non-redundant protein database (nr) [13]. This surprising

196 result could be due to a paucity of data from species closely related to *H. bacteriophora* in  
197 the NCBI nr database at the time of the search, or inclusion of poor protein predictions in  
198 the published set, or both. Targeted investigation of these 9893 orphan proteins here was  
199 not possible due to inconsistencies in gene naming in the publically available files. The  
200 published and BRAKER1/soft-masked proteomes were compared to the Uniref90 database  
201 [24], using DIAMOND v0.9.5 [25] with an expectation value cut-off of  $1e^{-5}$ . In the published  
202 proteome, 8962 proteins (42.7%) had no significant matches in Uniref90. Thus a relatively  
203 poorly populated database was not the main driver for the high number of orphan proteins  
204 reported in the published proteome. In the BRAKER1/soft-masked proteome, only 2889  
205 proteins (18.3%) had no hits in the Uniref90 database (Table 2).

206 OrthoFinder v1.1.4 [26] was used to define orthologous groups in the proteomes of 23  
207 rhabditine (Clade V) nematodes (Supplementary Files 5 and 6) and just the published *H.*  
208 *bacteriophora* protein-coding gene predictions, or just the BRAKER/soft-masked proteome,  
209 or both. All proteins <30 amino-acids long were excluded from clustering (see  
210 Supplementary File 5). We identified 5442 singletons (26.8% of the proteome) when the  
211 analysis included only the published *H. bacteriophora* protein set. An additional 248 proteins  
212 formed *H. bacteriophora*-specific orthogroups. Orthology analysis including only the  
213 BRAKER/soft-masked protein set predicted 1112 *H. bacteriophora* singletons (7.1% of the  
214 proteome) with 167 proteins in *H. bacteriophora*-specific orthogroups (Figure 2D). In  
215 comparison, when the orthology analysis included the BRAKER1/soft-masked predictions  
216 there were 1858 *C. elegans* singletons (9.2% of the *C. elegans* proteome). Very few universal,  
217 single copy orthologues were defined in either analysis. Exploring “fuzzy-1-to-1”  
218 orthogroups (where true 1-to-1 orthology was found for greater than 75% of the 24 species  
219 - i.e. 18 or more species), the published protein predictions had more missing fuzzy-1-to-1  
220 orthologues than did the BRAKER1/soft-masked predictions (Table 2). In the clustering that

221 included both proteomes, 2019 clusters contained more proteins from the BRAKER1/soft-  
222 masked than the published proteome, whereas 2714 contained a larger number contributed  
223 from the published than the BRAKER1/soft-masked proteome (Supplementary File 6).

224 The published *H. bacteriophora* gene set had additional peculiarities. The published set of  
225 gene models included 102274 introns, 9069 of which (8.9%) had non-canonical splice sites  
226 (i.e. 5' GC – AG 3'). Some of the genes in the published gene set had up to nine  
227 noncanonical introns (Figure 2E). In the BRAKER1/soft-masked gene set there were 109767  
228 introns, 868 (0.8%) of which had non-canonical splice sites. This proportion is in keeping  
229 with that found in most other rhabditine nematodes. For example, the extensively manually  
230 annotated *C. elegans* has 2429 (0.6%) non-canonical (5' GC – AG 3') introns. In *C. elegans*  
231 non-canonical introns are frequently found only in alternately spliced, and shorter isoforms,  
232 and over 93-99% were in genes that had homologues in other species, depending on the  
233 species used in the protein orthology clustering. However, in the published *H. bacteriophora*  
234 gene set, 34-49% of the genes with GC – AG introns were in *H. bacteriophora*-unique  
235 proteins.

236 A supermatrix maximum likelihood phylogeny was generated from the fuzzy-I-I  
237 orthologues in the clustering that included both *H. bacteriophora* proteomes (Figure 3; see  
238 Supplementary File 7). The phylogeny, rooted with *Pristionchus* spp., shows the *H.*  
239 *bacteriophora* proteomes as sisters. However the BRAKER1/soft-masked proteome has a  
240 shorter branch length to *Heterorhabditis*' most recent common ancestor with other Clade V  
241 nematodes, suggesting that the published proteome includes uniquely divergent sequences.

242 The secretome of *H. bacteriophora* has been of particular interest as it may contain proteins  
243 involved in symbiotic interactions with *P. luminescens*, and proteins crucial to invasion and  
244 survival within the insect haemocoel. In the original publication, only 603 proteins (2.8% of

245 the proteome) were predicted to be secreted [13]. This proportion is much lower than in  
246 free living nematodes such as *C. elegans* and it was postulated that *H. bacteriophora* relies on  
247 *P. luminescens* for secreted effectors [13]. The signal peptide detection method used in the  
248 original analyses was not described [13]. We used SignalP version 4.1 within Interproscan to  
249 annotate proteins in both the BRAKER1 and published *H. bacteriophora* proteomes. Proteins  
250 having a predicted signal peptide but no transmembrane domain were classified as secreted.  
251 We identified 1023 (6.5%) putative secreted proteins in the BRAKER1/soft-masked  
252 proteome and 1065 (5.1%) in the published proteome. By the same method other  
253 rhabditine (Clade V) nematodes that do not have known symbiotic associations with  
254 bacteria, such as *Teladorsagia circumcincta*, had comparable secretome sizes to *H.*  
255 *bacteriophora* (Supplementary File 8). This suggests that *H. bacteriophora* does not have a  
256 reduced secretome compared to other, related nematodes that do not have symbiont  
257 partners.

258

259

260

261

262

263

## 264 Discussion

265 Assembly of, and gene finding in, new genomes is a challenging task, and especially so in  
266 larger genomes and those phylogenetically distant from any previously analysed exemplar.  
267 When applied *de novo* to datasets from extremely well-assembled and well-annotated model  
268 species, even the best methods fail to recover fully contiguous assemblies and yield

1  
2  
3  
4  
5  
6  
7  
8  
9  
10  
11  
12  
13  
14  
15  
16  
17  
18  
19  
20  
21  
22  
23  
24  
25  
26  
27  
28  
29  
30  
31  
32  
33  
34  
35  
36  
37  
38  
39  
40  
41  
42  
43  
44  
45  
46  
47  
48  
49  
50  
51  
52  
53  
54  
55  
56  
57  
58  
59  
60  
61  
62  
63  
64  
65

269 predicted gene sets that have poor correspondence with the known truth [27]. A major  
270 issue with primary assemblies and gene sets arises when exceptional findings are taken at  
271 face value, and used to assert exceptional biology in a target species [28]. Where these  
272 exceptions are in fact the result of methodological failings, the scientific record, including the  
273 public databases, becomes contaminated. At best, erroneous assertions can be quickly  
274 checked and corrected, but at worst they can mislead and inhibit subsequent work.

275 A second concern arises from the recognition that while no method can currently produce  
276 perfect assemblies and perfect gene sets from raw data, analyses using the same toolsets will  
277 resemble each other and reflect the successes and failings of the particulars of the  
278 algorithms employed. However, when comparing genome assemblies and gene sets  
279 produced by different pipelines, it may be that the disparity in output generated by different  
280 pipelines dominates any signal from biology. Genomes assembled and annotated with the  
281 same tools will look more similar, and in a pool of assemblies and protein sets the one  
282 species that used a variant process will be flagged as exceptional. Again, the model  
283 organisms show the way: as new data and new scrutiny is added to the genome, better and  
284 better analyses are available. With additional analysis, and additional independent data,  
285 genome and gene predictions can be improved markedly for any species [29].

286 Here we examined the “outlier” whole-genome protein predictions from the  
287 entomopathogenic nematode *H. bacteriophora* [13]. The original publication noted that the  
288 number of novel proteins (those restricted to *H. bacteriophora*) was particularly large, while  
289 the number of secreted proteins was rather small, and suggested that these genome  
290 features might be a result of evolution to the species’ novel lifestyle (which includes an  
291 essential symbiosis with the bacterium *P. luminescens*). Overall we found that while the  
292 published genome sequence had a small amount of bacterial contamination, and a small

293 number of “nematode” genes were predicted from these contaminants, the assembly itself  
294 was of high quality. Our re-prediction of the gene set of *H. bacteriophora* however suggested  
295 that the excess of unique genes, the lack of secreted proteins and several other surprising  
296 features of the original gene set were likely to be artefacts of the gene prediction pipeline  
297 chosen. While our gene set was by no means perfect (for example we identified an excess  
298 of single exon genes that derive from likely repetitive sequence) it had better biological  
299 completeness and credibility.

300 We used the RNA-seq based annotation pipeline BRAKER1 [23], not available to the  
301 authors of the original genome publication, who used JIGSAW [14] (see Supplementary File  
302 9). While JIGSAW achieved high sensitivity and specificity at the level of nucleotide, exon  
303 and gene predictions in the nematode genome annotation assessment project, nGASP [27],  
304 direct comparison of the sensitivity and specificity of JIGSAW and BRAKER1 has not been  
305 published to the best of our knowledge. BRAKER1 has been shown to give superior  
306 prediction results over *ab initio* GeneMark-ES, or *ab initio* AUGUSTUS alone [23]. In  
307 particular, BRAKER1 is able to better use transcriptome data for gene finding. While we  
308 supplied only low volumes of Sanger-sequenced ESTs and a partial Roche 454 transcriptome  
309 to BRAKER1, the resulting gene set has much improved numerical and biological scores. In  
310 particular we note that the biological completeness of the predicted gene set now matches  
311 that of the genome sequence from which it was derived (Table 2).

312 The published gene set had an unusually high proportion (8.9%) of non-canonical (5' GC –  
313 AG 3') introns. While most genomes have a low proportion of non-canonical introns  
314 (usually approximately 0.5% of all introns), some species have markedly higher proportions  
315 [19]. The high proportion found initially in *H. bacteriophora* could perhaps have been taken  
316 as a warning that the prediction set was of concern. We note that gene predictors can be

1  
2  
3  
4  
5  
6  
7  
8  
9  
10  
11  
12  
13  
14  
15  
16  
17  
18  
19  
20  
21  
22  
23  
24  
25  
26  
27  
28  
29  
30  
31  
32  
33  
34  
35  
36  
37  
38  
39  
40  
41  
42  
43  
44  
45  
46  
47  
48  
49  
50  
51  
52  
53  
54  
55  
56  
57  
58  
59  
60  
61  
62  
63  
64  
65

317 set to disallow any predictions that require non-canonical splicing, and many published  
318 genomes have zero non-canonical introns. These gene prediction sets are likely to  
319 categorically miss true non-canonically spliced genes.

320 The new BRAKER1 gene prediction set had many fewer species-unique genes (7.1%) than  
321 did the original (42.7%) when compared to 23 other related nematodes. We regard this  
322 reduction in novelty as indicative of a better prediction, as, for example, *C. elegans*, the best-  
323 annotated nematode genome, had only 9.2% of species unique genes in our analysis. Having  
324 a large proportion of orphan proteins is not unique to the published *H. bacteriophora*  
325 predictions. Nearly half (47%) of the gene predictions in *Pristionchus pacificus* were reported  
326 to have no homologues in fifteen other nematode species [30]. Evaluation of proteomic and  
327 transcriptomic evidence, as well as patterns of synonymous and non-synonymous  
328 substitution, suggested that as many as 42-81% of these genes were in fact expressed [31].  
329 Therefore the high proportion of orphan genes in *H. bacteriophora* is not *prima facie*  
330 evidence of poor gene predictions. Expanded transcriptomic and comparative data are  
331 needed to build on the work we have presented in affirming the true *H. bacteriophora* gene  
332 set.

333 Biological pest control agents may become increasingly important for ensuring crop  
334 protection in the future [32]. A number of factors currently limit the commercial  
335 applicability of *H. bacteriophora*, including their short shelf life, susceptibility to environmental  
336 stress and limited insect tropism [12, 33]. Accurate genome annotation will assist in the  
337 analysis of *H. bacteriophora*, facilitating the exploration of genes involved in its parasitic and  
338 symbiotic interactions, and supporting genetic manipulation to enhance its utility as a  
339 biological control agent.



## 340 **Acknowledgements**

1  
2  
3 341 This project was supported by FMs Wellcome Trust-funded graduate programme  
4  
5 342 [204052/Z/16/Z]. Sujai Kumar, Lewis Stevens, Carlos Caurcel and Elisabeth Sjokvist offered  
6  
7  
8 343 expert technical support and advice. Igor Antoshechkin of the Millard and Muriel Jacobs  
9  
10 344 Genetics and Genomics Laboratory at Caltech assisted with Illumina sequencing. Adler  
11  
12  
13 345 Dillman provided the parental strain for the inbred *H. bacteriophora* strain G2a1223.  
14

15 346

16  
17  
18 347

19  
20  
21  
22 348

23  
24  
25 349

26  
27  
28 350

29  
30  
31 351

32  
33  
34  
35 352

36  
37  
38 353

39  
40  
41  
42 354

## 43 44 45 355 **Methods**

### 46 47 48 49 356 **Input data and data availability**

50  
51  
52 357 The *H. bacteriophora* genome and annotations [13] were downloaded from Wormbase  
53  
54  
55 358 Parasite (WBPS8) [34]. ESTs [35, 36] were obtained from NCBI dbEST [37]. Roche 454  
56  
57 359 transcriptome data [13] were obtained from the Short Read Archive. *H. bacteriophora* strain  
58  
59  
60 360 Gebre, a gift from Adler Dillman, was inbred by selfing single hermaphrodites for five

361 generations to generate the strain G2a1223. New Illumina HiSeq2000, paired end, 75 base  
362 data were generated from *H. bacteriophora* G2a1223 genomic DNA by the Millard and  
363 Muriel Jacobs Genetics and Genomics Laboratory at Caltech. They have been deposited in  
364 SRA under XXXXXXXX [in process].

365

366 The revised gene annotations for *H. bacteriophora* have been submitted to the INSDC under  
367 project XXXXXXXX [to be advised]. The Supplementary files for this manuscript are  
368 additionally available at <https://github.com/DRL/mclean2017>. All custom scripts developed  
369 for this manuscript are available at <https://github.com/DRL/mclean2017>.

### 370 **Contaminant screening and Removal of Low Coverage Scaffolds**

371 The assembly scaffolds were aligned to the NCBI nucleotide (nt) database, release 204, using  
372 Nucleotide-Nucleotide BLAST v2.6.0+ (RRID:SCR\_008419) in megablast mode, with an e-  
373 value cut off of  $1e^{-25}$  and a culling limit of 2 [38]. *H. bacteriophora* hits were excluded from  
374 the search using a list of all *H. bacteriophora* associated gene identifiers downloaded from  
375 NCBI GenBank nucleotide database, release 219. Raw, paired-end Illumina reads from the  
376 re-sequencing project were mapped against the assembly, as paired, using Burrows-Wheeler  
377 Aligner (BWA) v0.7.15 (RRID:SCR\_010910) in mem mode with default options [39]. The  
378 output was converted to a BAM file using Samtools v1.3.1 (RRID:SCR\_002105) [40] and  
379 overall mapping statistics generated in flagstat mode.

380 Blobtools v0.9.19 [20] was used to create taxon annotated GC-coverage plots for the  
381 published assembly, using the Nucleotide-Nucleotide BLAST and raw read mapping results.  
382 Scaffolds that did not have Nematoda as a top BLAST hit at the phylum level were identified,  
383 and the species-level top BLAST hit, length of scaffold, and scaffold mean base coverage

384 were extracted from the Blobology output. Scaffolds with a mean base coverage of <10x  
385 were identified from the output of the Blobology pipeline and removed from the assembly.  
386 A list of excluded scaffolds is available in Supplementary File 1.

### 387 **Generation of BRAKER1 Gene Predictions**

388 Before annotation the published assembly was soft masked for known Nematoda repeats  
389 from the RepeatMasker Library v4.0.6 using RepeatMasker v4.0.6 (RRID:SCR\_012954) [41]  
390 with default options. The two publicly available Roche 454 RNA-seq data files were adaptor  
391 and quality-trimmed using BBDuk v36.92 (unpublished toolkit from Joint Genome Institute,  
392 n.d.). Reads below an average quality of 10 or shorter than 25 nucleotides were discarded.  
393 Regions with average quality below 20 were trimmed. The cleaned reads were mapped to  
394 the soft masked assembly using STAR v2.5 (RRID:SCR\_005622) with default options [42,  
395 43]. The soft masked assembly was annotated with BRAKER1 [23] with guidance from the  
396 mapping output from STAR. An identical annotation method was applied to a hard masked  
397 version of the assembly. Hard masking was for known Nematoda repeats from the  
398 RepeatMasker Library v4.0.6 using RepeatMasker v4.0.6 with default options. The published  
399 and BRAKER1 proteomes were compared using DIAMOND v0.9.5 [25] in BLASTP mode to  
400 the Uniref90 database (release 03/2017) [24] with an expectation value cut-off of  $1e^{-5}$  and  
401 no limit on the number of target sequences. Hits to *H. bacteriophora* proteins were  
402 removed using its TaxonID.

### 403 **Gene Prediction Statistics**

404 Gene-level statistical summaries were calculated including only the longest isoforms of the  
405 BRAKER1 gene predictions. The longest isoform for each gene in the BRAKER1 *H.*  
406 *bacteriophora* annotation was identified from the general feature format file, and then

1  
2  
3  
4  
5  
6  
7  
8  
9  
10  
11  
12  
13  
14  
15  
16  
17  
18  
19  
20  
21  
22  
23  
24  
25  
26  
27  
28  
29  
30  
31  
32  
33  
34  
35  
36  
37  
38  
39  
40  
41  
42  
43  
44  
45  
46  
47  
48  
49  
50  
51  
52  
53  
54  
55  
56  
57  
58  
59  
60  
61  
62  
63  
64  
65

407 selected from the protein FASTA files. The general feature format file (GFF) for the  
408 published gene predictions did not contain any isoforms and was analysed in its entirety.  
409 Mean protein lengths were calculated from the amino-acid protein sequence files. Introns  
410 were inferred for the published GFF file using GenomeTools v1.5.9 in -addintrons mode  
411 [44]. Intron frequencies were then calculated for the published and BRAKER1 annotations  
412 from their respective GFF files. Exon frequencies were calculated for the published  
413 annotations directly from the GFF file. For the BRAKER1 annotations, exon frequency per  
414 gene was assumed to be equivalent to coding DNA sequence (CDS) frequency and inferred  
415 from the general feature format file as exon features were not included in the GFF. Intron  
416 frequency histograms and bar plots were generated in Rstudio v1.0.136 (RRID:SCR\_005622)  
417 with R v3.3.2 (RRID:SCR\_001905) and in some instances the package ggplot2 v2.2.1. As  
418 intron frequency lists did not contain single exon genes (those with no introns), these were  
419 added manually to the intron frequency lists in Microsoft Excel before importing the data  
420 into Rstudio.

421 The proportion of introns with GC – AG splice junctions was assessed for the gene models  
422 of *C. elegans* (WS258), and the published and BRAKER1/soft-masked gene models of *H.*  
423 *bacteriophora*. Intronic features were added to GFF3 files using GenomeTools v1.5.9 [44] ('gt  
424 gff3 -sort -tidy -retainids -fixregionboundaries -addintrons') and splice sites were  
425 extracted using the script extractRegionFromCoordinates.py [19]. Results were visualised  
426 using the script plot\_GCAG\_counts.R (see <https://github.com/DRL/mclean2017>).

427 Gene features, extracted from the GFF files, were assessed for overlap using bedtools v2.26  
428 (RRID:SCR\_006646) in intersect mode [45]. Only genes on the same strand were  
429 considered to be overlapping. To calculate the number of identical proteins shared between  
430 the published and BRAKER1 proteomes non-redundant protein fasta files were generated

1  
2  
3  
4  
5  
6  
7  
8  
9  
10  
11  
12  
13  
14  
15  
16  
17  
18  
19  
20  
21  
22  
23  
24  
25  
26  
27  
28  
29  
30  
31  
32  
33  
34  
35  
36  
37  
38  
39  
40  
41  
42  
43  
44  
45  
46  
47  
48  
49  
50  
51  
52  
53  
54  
55  
56  
57  
58  
59  
60  
61  
62  
63  
64  
65

431 using cd-hit v4.6.1 (RRID:SCR\_007105) [46] for the BRAKER1 and published predictions.

432 The files were concatenated, sorted and unique sequences counted using unix command line  
433 tools.

434 BUSCO v2.0.1 (RRID:SCR\_015008) [18], with Eukaryota as the lineage dataset, and

435 *Caenorhabditis* as the species parameter for orthologue finding was applied to both

436 proteomes and the published assembly to calculate BUSCO scores. CEGMA

437 (RRID:SCR\_015055) [17] was run on the published genome sequence. BWA was used with

438 default settings to map the RNA-seq datasets to the CDS transcripts from the published and

439 BRAKER1 annotations and the summary statistics obtained with Samtools v1.3.1 in flagstat

440 mode.

#### 441 **Protein orthology analyses**

442 OrthoFinder v1.1.4 [26] with default settings was used to identify orthologous groups in the

443 proteomes of 23 Clade V nematodes with the addition of either the BRAKER1/soft-masked

444 and published *H. bacteriophora* proteomes separately or simultaneously. The proteomes for

445 the 23 Clade V nematodes were downloaded from WBPS8 (available at:

446 <http://parasite.wormbase.org/index.html>) or GenomeHubs.org (available at

447 <http://ensembl.caenorhabditis.org/index.html>), and detailed source information is available in

448 Supplementary File 5. All proteomes were filtered to contain only the longest isoform of

449 each gene, and for all proteomes (except the BRAKER1/soft-masked *H. bacteriophora*

450 protein set), proteins less than 30 amino-acids in length were excluded before clustering.

451 For the *H. bacteriophora* BRAKER1/soft-masked protein set, proteins less than 30 amino-

452 acids (SF5.2) were removed manually from the orthofinder clustering statistics after

453 clustering. None of these proteins seeded new clusters and are therefore will not have

454 influenced the clustering results. Kinfin v0.9 [47], was used with default settings to identify

1  
2 455 true and fuzzy 1-to-1 orthologues, and their associated species specific statistics. Fuzzy 1-to-  
3  
4 456 1 orthologues are true 1-to-1 orthologues for greater than 75% of the species clustered.  
5  
6 457 For the clustering analysis presented in Supplementary File 3, the BRAKER1/soft masked and  
7  
8 458 published proteomes were clustered simultaneously to the 23 other Clade V nematode  
9  
10 459 proteomes, and singletons, and species-specific clusters were excluded.

## 11 12 13 460 **Interproscan and search for transposons**

14  
15  
16 461 Interproscan v5.19-58.0 (RRID:SCR\_005829) [48] was used in protein mode to identify  
17  
18 462 matches with the BRAKER1 and published *H. bacteriophora* predicted proteomes in the  
19  
20 463 following databases: TIGRFAM v15.0, ProDom v2006.1, SMART-7.1, SignalP-EUK v4.1,  
21  
22 464 PrositePatterns v20.119, PRINTS v42.0, SuperFamily v1.75, Pfam v29.0, and PrositeProfiles  
23  
24 465 v20.119. InterProScan was run with the option for all match calculations to be run locally  
25  
26 466 and with gene ontology annotation activated. The number of single exon genes with  
27  
28 467 similarity to transposons or transposases in the BRAKER1/soft masked predictions was  
29  
30 468 calculated by searching the full InterProScan results for the strings 'Transposon',  
31  
32 469 'transposon', 'Transposase', or 'transposase' and the number of single exon gene  
33  
34 470 InterProScan results containing these terms counted. InterProScan results from searching  
35  
36 471 the SignalP-EUK-4.1 database were queried to identify putative secreted proteins. Those  
37  
38 472 with a predicted signal peptide but no transmembrane region were considered to be  
39  
40 473 secreted.

## 41 42 43 44 45 46 47 48 49 474 **Phylogenetic Analyses**

50  
51  
52  
53 475 Both *H. bacteriophora* proteomes were clustered simultaneously with the 23 Clade V  
54  
55 476 nematode proteomes into orthologous groups using Orthofinder v1.0 [26]. The fuzzy 1-to-1  
56  
57 477 orthologues were extracted and processed using GNU parallel [49]. They were aligned

1  
2  
3  
4  
5  
6  
7  
8  
9  
10  
11  
12  
13  
14  
15  
16  
17  
18  
19  
20  
21  
22  
23  
24  
25  
26  
27  
28  
29  
30  
31  
32  
33  
34  
35  
36  
37  
38  
39  
40  
41  
42  
43  
44  
45  
46  
47  
48  
49  
50  
51  
52  
53  
54  
55  
56  
57  
58  
59  
60  
61  
62  
63  
64  
65

478 using MAFFT v7.267 (RRID:SCR\_011811) [50], and the alignments trimmed with NOISY  
479 v1.5.12. A maximum likelihood gene tree was generated for each orthologue using RaXML  
480 v8.1.20 (RRID:SCR\_006086) [51] with a PROTGAMMAGTR amino-acid substitution model.  
481 Rapid Bootstrap analysis and search for the best -scoring ML tree within one program run  
482 with 100 rapid bootstrap replicates was used. The trees were pruned using  
483 PhyloTreePruner v1.0 [52] to remove paralogues, with 0.5 as the bootstrap cutoff and a  
484 minimum of 20 species in the orthogroup after pruning for inclusion in the supermatrix.  
485 Where species had more than one putative orthologue in an orthogroup the longest was  
486 selected. The remaining 897 orthogroups were re-aligned using MAFFT v7.267, trimmed  
487 with NOISY v1.5.12 and concatenated into a supermatrix using FASconCAT v.1.0 [53]. A  
488 supermatrix maximum-likelihood tree was generated using RAxML with the rapid hill  
489 climbing algorithm (default), with a PROTGAMMAGTR amino-acid substitution model and  
490 100 bootstrap replicates. *Pristionchus* spp. were designated as the outgroup. The tree was  
491 visualised in Dendroscope v3.5.9 [54].

492

493

494

## 495 **Bibliography**

496 1. *C. elegans* Sequencing Consortium. Genome sequence of the nematode *C. elegans*: a  
497 platform for investigating biology. *Science*. 1998;282:2012–8.

498 2. Howe KL, Bolt BJ, Cain S, Chan J, Chen WJ, Davis P, et al. WormBase 2016: expanding to  
499 enable helminth genomic research. *Nucleic Acids Res*. 2016;44:D774-80.

500 doi:10.1093/nar/gkv1217.

- 1  
2  
3  
4  
5  
6  
7  
8  
9  
10  
11  
12  
13  
14  
15  
16  
17  
18  
19  
20  
21  
22  
23  
24  
25  
26  
27  
28  
29  
30  
31  
32  
33  
34  
35  
36  
37  
38  
39  
40  
41  
42  
43  
44  
45  
46  
47  
48  
49  
50  
51  
52  
53  
54  
55  
56  
57  
58  
59  
60  
61
- 501 3. Gil GH, Choo HY, Gaugler R. Enhancement of entomopathogenic nematode production  
502 in in-vitro liquid culture of *Heterorhabditis bacteriophora* by fed-batch culture with glucose  
503 supplementation. Appl Microbiol Biotechnol. 2002;58:751–5. doi:10.1007/s00253-002-0956-  
504 1.
  - 505 4. Memari Z, Karimi J, Kamali S, Goldansaz SH, Hosseini M. Are Entomopathogenic  
506 Nematodes Effective Biological Control Agents Against the Carob Moth, *Ectomyelois*  
507 *ceratoniae*? J Nematol. 2016;48:261–7.
  - 508 5. Rezaei N, Karimi J, Hosseini M, Goldani M, Campos-Herrera R. Pathogenicity of Two  
509 Species of Entomopathogenic Nematodes Against the Greenhouse Whitefly, *Trialeurodes*  
510 *vaporariorum* (Hemiptera: Aleyrodidae), in Laboratory and Greenhouse Experiments. J  
511 Nematol. 2015;47:60–6.
  - 512 6. Dillman AR, Guillermin ML, Lee JH, Kim B, Sternberg PW, Hallem EA. Olfaction shapes  
513 host-parasite interactions in parasitic nematodes. Proc Natl Acad Sci U S A.  
514 2012;109:E2324-33. doi:10.1073/pnas.1211436109.
  - 515 7. Anbesse S, Ehlers RU. Attraction of *Heterorhabditis* sp. toward synthetic (E)-beta-  
516 caryophyllene, a plant SOS signal emitted by maize on feeding by larvae of *Diabrotica virgifera*  
517 *virgifera*. Commun Agric Appl Biol Sci. 2010;75:455–8.
  - 518 8. Han R, Ehlers RU. Pathogenicity, development, and reproduction of *Heterorhabditis*  
519 *bacteriophora* and *Steinernema carpocapsae* under axenic in vivo conditions. J Invertebr Pathol.  
520 2000;75:55–8. doi:10.1006/jjpa.1999.4900.
  - 521 9. Ciche TA, Bintrim SB, Horswill AR, Ensign JC. A Phosphopantetheinyl transferase  
522 homolog is essential for *Photorhabdus luminescens* to support growth and reproduction of  
523 the entomopathogenic nematode *Heterorhabditis bacteriophora*. J Bacteriol. 2001;183:3117–  
524 26. doi:10.1128/JB.183.10.3117-3126.2001.



- 1  
2  
3  
4  
5  
6  
7  
8  
9  
10  
11  
12  
13  
14  
15  
16  
17  
18  
19  
20  
21  
22  
23  
24  
25  
26  
27  
28  
29  
30  
31  
32  
33  
34  
35  
36  
37  
38  
39  
40  
41  
42  
43  
44  
45  
46  
47  
48  
49  
50  
51  
52  
53  
54  
55  
56  
57  
58  
59  
60  
61
- 525 10. Bennett HPJ, Clarke DJ. The pbgPE operon in *Photorhabdus luminescens* is required for  
526 pathogenicity and symbiosis. *J Bacteriol.* 2005;187:77–84. doi:10.1128/JB.187.1.77-84.2005.
- 527 11. Tobias NJ, Heinrich AK, Eresmann H, Wright PR, Neubacher N, Backofen R, et al.  
528 *Photorhabdus*-nematode symbiosis is dependent on hfq-mediated regulation of secondary  
529 metabolites. *Environ Microbiol.* 2017;19:119–29. doi:10.1111/1462-2920.13502.
- 530 12. Ciche T. The biology and genome of *Heterorhabditis bacteriophora*. *WormBook.* 2007;1–  
531 9. doi:10.1895/wormbook.1.135.1.
- 532 13. Bai X, Adams BJ, Ciche TA, Clifton S, Gaugler R, Kim K, et al. A lover and a fighter: the  
533 genome sequence of an entomopathogenic nematode *Heterorhabditis bacteriophora*. *PLoS*  
534 *ONE.* 2013;8:e69618. doi:10.1371/journal.pone.0069618.
- 535 14. Allen JE, Salzberg SL. JIGSAW: integration of multiple sources of evidence for gene  
536 prediction. *Bioinformatics.* 2005;21:3596–603. doi:10.1093/bioinformatics/bti609.
- 537 15. Duchaud E, Rusniok C, Frangeul L, Buchrieser C, Givaudan A, Taourit S, et al. The  
538 genome sequence of the entomopathogenic bacterium *Photorhabdus luminescens*. *Nat*  
539 *Biotechnol.* 2003;21:1307–13. doi:10.1038/nbt886.
- 540 16. Blaxter M, Koutsovoulos G. The evolution of parasitism in Nematoda. *Parasitology.*  
541 2015;142 Suppl 1:S26-39. doi:10.1017/S0031182014000791.
- 542 17. Parra G, Bradnam K, Korf I. CEGMA: a pipeline to accurately annotate core genes in  
543 eukaryotic genomes. *Bioinformatics.* 2007;23:1061–7. doi:10.1093/bioinformatics/btm071.
- 544 18. Simão FA, Waterhouse RM, Ioannidis P, Kriventseva EV, Zdobnov EM. BUSCO:  
545 assessing genome assembly and annotation completeness with single-copy orthologs.  
546 *Bioinformatics.* 2015;31:3210–2. doi:10.1093/bioinformatics/btv351.
- 547 19. Eves-van den Akker S, Laetsch DR, Thorpe P, Lilley CJ, Danchin EGJ, Da Rocha M, et al.

- 1  
2 549 The genome of the yellow potato cyst nematode, *Globodera rostochiensis*, reveals insights into  
3 the basis of parasitism and virulence. *Genome Biol.* 2016;17:124. doi:10.1186/s13059-016-  
4 0985-1.  
5 550  
6  
7 551 20. Laetsch DR, Blaxter ML. BlobTools: Interrogation of genome assemblies [version 1;  
8 referees: 1 approved with reservations]. *F1000Res.* 2017;6:1287.  
9  
10 552 doi:10.12688/f1000research.12232.1.  
11  
12 553  
13  
14  
15 554 21. Fierst JL, Murdock DA, Thanthiriwatte C, Willis JH, Phillips PC. Metagenome-Assembled  
16 Draft Genome Sequence of a Novel Microbial *Stenotrophomonas maltophilia* Strain Isolated  
17 from *Caenorhabditis remanei* Tissue. *Genome Announc.* 2017;5.  
18 555  
19  
20 556 doi:10.1128/genomeA.01646-16.  
21  
22 557  
23  
24  
25 558 22. Grenier E, Abadon M, Brunet F, Capy P, Abad P. A *mariner*-like transposable element in  
26 the insect parasite nematode *Heterorhabditis bacteriophora*. *J Mol Evol.* 1999;48:328–36.  
27 559  
28  
29  
30  
31 560 23. Hoff KJ, Lange S, Lomsadze A, Borodovsky M, Stanke M. BRAKER1: Unsupervised RNA-  
32 Seq-Based Genome Annotation with GeneMark-ET and AUGUSTUS. *Bioinformatics.*  
33 561  
34 2016;32:767–9. doi:10.1093/bioinformatics/btv661.  
35  
36 562  
37  
38  
39 563 24. Boutet E, Lieberherr D, Tognolli M, Schneider M, Bansal P, Bridge AJ, et al.  
40 UniProtKB/Swiss-Prot, the Manually Annotated Section of the UniProt KnowledgeBase:  
41 How to Use the Entry View. *Methods Mol Biol.* 2016;1374:23–54. doi:10.1007/978-1-4939-  
42 3167-5\_2.  
43 564  
44 565  
45  
46 566  
47  
48  
49 567 25. Buchfink B, Xie C, Huson DH. Fast and sensitive protein alignment using DIAMOND.  
50 *Nat Methods.* 2015;12:59–60. doi:10.1038/nmeth.3176.  
51 568  
52  
53  
54 569 26. Emms DM, Kelly S. OrthoFinder: solving fundamental biases in whole genome  
55 comparisons dramatically improves orthogroup inference accuracy. *Genome Biol.*  
56 570  
57 2015;16:157. doi:10.1186/s13059-015-0721-2.  
58 571  
59  
60  
61

- 1  
2  
3  
4  
5  
6  
7  
8  
9  
10  
11  
12  
13  
14  
15  
16  
17  
18  
19  
20  
21  
22  
23  
24  
25  
26  
27  
28  
29  
30  
31  
32  
33  
34  
35  
36  
37  
38  
39  
40  
41  
42  
43  
44  
45  
46  
47  
48  
49  
50  
51  
52  
53  
54  
55  
56  
57  
58  
59  
60  
61  
62  
63  
64  
65
- 572 27. Coghlan A, Fiedler TJ, McKay SJ, Flicek P, Harris TW, Blasiar D, et al. nGASP--the  
573 nematode genome annotation assessment project. *BMC Bioinformatics*. 2008;9:549.  
574 doi:10.1186/1471-2105-9-549.
- 575 28. Koutsovoulos G, Kumar S, Laetsch DR, Stevens L, Daub J, Conlon C, et al. No evidence  
576 for extensive horizontal gene transfer in the genome of the tardigrade *Hypsibius dujardini*.  
577 *Proc Natl Acad Sci U S A*. 2016;113:5053–8. doi:10.1073/pnas.1600338113.
- 578 29. Yoshida Y, Koutsovoulos G, Laetsch DR, Stevens L, Kumar S, Horikawa DD, et al.  
579 Comparative genomics of the tardigrades *Hypsibius dujardini* and *Ramazzottius varieornatus*.  
580 *PLoS Biol*. 2017;15:e2002266. doi:10.1371/journal.pbio.2002266.
- 581 30. Baskaran P, Rödelsperger C, Prabh N, Serobyán V, Markov GV, Hirsekorn A, et al.  
582 Ancient gene duplications have shaped developmental stage-specific expression in  
583 *Pristionchus pacificus*. *BMC Evol Biol*. 2015;15:185. doi:10.1186/s12862-015-0466-2.
- 584 31. Prabh N, Rödelsperger C. Are orphan genes protein-coding, prediction artifacts, or non-  
585 coding RNAs? *BMC Bioinformatics*. 2016;17:226. doi:10.1186/s12859-016-1102-x.
- 586 32. Kergunteuil A, Bakhtiari M, Formenti L, Xiao Z, Defosse E, Rasmann S. Biological  
587 Control beneath the Feet: A Review of Crop Protection against Insect Root Herbivores.  
588 *Insects*. 2016;7. doi:10.3390/insects7040070.
- 589 33. Ali F, Wharton DA. Cold tolerance abilities of two entomopathogenic nematodes,  
590 *Steinernema feltiae* and *Heterorhabditis bacteriophora*. *Cryobiology*. 2013;66:24–9.  
591 doi:10.1016/j.cryobiol.2012.10.004.
- 592 34. Howe KL, Bolt BJ, Shafie M, Kersey P, Berriman M. WormBase ParaSite - a  
593 comprehensive resource for helminth genomics. *Mol Biochem Parasitol*. 2017;215:2–10.  
594 doi:10.1016/j.molbiopara.2016.11.005.

- 1  
2  
3  
4  
5  
6  
7  
8  
9  
10  
11  
12  
13  
14  
15  
16  
17  
18  
19  
20  
21  
22  
23  
24  
25  
26  
27  
28  
29  
30  
31  
32  
33  
34  
35  
36  
37  
38  
39  
40  
41  
42  
43  
44  
45  
46  
47  
48  
49  
50  
51  
52  
53  
54  
55  
56  
57  
58  
59  
60  
61
- 595 35. Sandhu SK, Jagdale GB, Hogenhout SA, Grewal PS. Comparative analysis of the  
596 expressed genome of the infective juvenile entomopathogenic nematode, *Heterorhabditis*  
597 *bacteriophora*. Mol Biochem Parasitol. 2006;145:239–44.  
598 doi:10.1016/j.molbiopara.2006.01.002.
- 599 36. Hao Y-J, Montiel R, Lucena MA, Costa M, Simoes N. Genetic diversity and comparative  
600 analysis of gene expression between *Heterorhabditis bacteriophora* Az29 and Az36 isolates:  
601 uncovering candidate genes involved in insect pathogenicity. Exp Parasitol. 2012;130:116–25.  
602 doi:10.1016/j.exppara.2011.12.001.
- 603 37. Boguski MS, Lowe TM, Tolstoshev CM. dbEST--database for “expressed sequence tags”.  
604 Nat Genet. 1993;4:332–3. doi:10.1038/ng0893-332.
- 605 38. Boratyn GM, Camacho C, Cooper PS, Coulouris G, Fong A, Ma N, et al. BLAST: a more  
606 efficient report with usability improvements. Nucleic Acids Res. 2013;41 Web Server  
607 issue:W29-33. doi:10.1093/nar/gkt282.
- 608 39. Li H, Durbin R. Fast and accurate short read alignment with Burrows-Wheeler  
609 transform. Bioinformatics. 2009;25:1754–60. doi:10.1093/bioinformatics/btp324.
- 610 40. Li H, Handsaker B, Wysoker A, Fennell T, Ruan J, Homer N, et al. The Sequence  
611 Alignment/Map format and SAMtools. Bioinformatics. 2009;25:2078–9.  
612 doi:10.1093/bioinformatics/btp352.
- 613 41. Tarailo-Graovac M, Chen N. Using RepeatMasker to identify repetitive elements in  
614 genomic sequences. Curr Protoc Bioinformatics. 2009;Chapter 4:Unit 4.10.  
615 doi:10.1002/0471250953.bi0410s25.
- 616 42. Dobin A, Davis CA, Schlesinger F, Drenkow J, Zaleski C, Jha S, et al. STAR: ultrafast  
617 universal RNA-seq aligner. Bioinformatics. 2013;29:15–21.  
618 doi:10.1093/bioinformatics/bts635.

- 619 43. Dobin A, Gingeras TR. Optimizing RNA-Seq Mapping with STAR. *Methods Mol Biol.*  
2016;1415:245–62. doi:10.1007/978-1-4939-3572-7\_13.
- 621 44. Gremme G, Steinbiss S, Kurtz S. GenomeTools: a comprehensive software library for  
efficient processing of structured genome annotations. *IEEE/ACM Trans Comput Biol  
Bioinform.* 2013;10:645–56. doi:10.1109/TCBB.2013.68.
- 624 45. Quinlan AR, Hall IM. BEDTools: a flexible suite of utilities for comparing genomic  
features. *Bioinformatics.* 2010;26:841–2. doi:10.1093/bioinformatics/btq033.
- 626 46. Huang Y, Niu B, Gao Y, Fu L, Li W. CD-HIT Suite: a web server for clustering and  
comparing biological sequences. *Bioinformatics.* 2010;26:680–2.  
doi:10.1093/bioinformatics/btq003.
- 629 47. Laetsch DR, Blaxter ML. KinFin: Software for Taxon-Aware Analysis of Clustered  
Protein Sequences. *G3 (Bethesda).* 2017. doi:10.1534/g3.117.300233.
- 631 48. Finn RD, Attwood TK, Babbitt PC, Bateman A, Bork P, Bridge AJ, et al. InterPro in  
2017-beyond protein family and domain annotations. *Nucleic Acids Res.* 2017;45:D190–9.  
doi:10.1093/nar/gkwl107.
- 634 49. Tange O. GNU Parallel - The Command-Line Power Tool. *login: The USENIX  
Magazine.* 2011;36:42–7.
- 636 50. Katoh K, Standley DM. MAFFT multiple sequence alignment software version 7:  
improvements in performance and usability. *Mol Biol Evol.* 2013;30:772–80.  
doi:10.1093/molbev/mst010.
- 639 51. Stamatakis A. RAxML-VI-HPC: maximum likelihood-based phylogenetic analyses with  
thousands of taxa and mixed models. *Bioinformatics.* 2006;22:2688–90.  
doi:10.1093/bioinformatics/btl446.

- 1  
2  
3  
4  
5  
6  
7  
8  
9  
10  
11  
12  
13  
14  
15  
16  
17  
18  
19  
20  
21  
22  
23  
24  
25  
26  
27  
28  
29  
30  
31  
32  
33  
34  
35  
36  
37  
38  
39  
40  
41  
42  
43  
44
- 642 52. Kocot KM, Citarella MR, Moroz LL, Halanych KM. PhyloTreePruner: A Phylogenetic  
643 Tree-Based Approach for Selection of Orthologous Sequences for Phylogenomics. *Evol*  
644 *Bioinform Online*. 2013;9:429–35. doi:10.4137/EBO.S12813.
- 645 53. Kück P, Meusemann K. FASconCAT: Convenient handling of data matrices. *Mol*  
646 *Phylogenet Evol*. 2010;56:1115–8. doi:10.1016/j.ympev.2010.04.024.
- 647 54. Huson DH, Scornavacca C. Dendroscope 3: an interactive tool for rooted phylogenetic  
648 trees and networks. *Syst Biol*. 2012;61:1061–7. doi:10.1093/sysbio/sys062.

649  
650  
651

652  
653

654  
655

656  
657

## 658 **Figures and Legends**

### 659 **Figure 1. Taxon-annotated GC-coverage plot of the *H. bacteriophora* assembly.**

660 Bottom left panel: Each scaffold or contig is represented by a single filled circle. Each scaffold  
661 is placed in the main panel based on its GC proportion (X axis) and coverage by reads from  
662 the Illumina re-sequencing project (Y axis). The fill colour of the circle indicates the taxon of  
663 the top BLASTn hit in the NCBI nt database for that scaffold. The colours are annotated in

1  
2  
3  
4  
5  
6  
7  
8  
9  
10  
11  
12  
13  
14  
15  
16  
17  
18  
19  
20  
21  
22  
23  
24  
25  
26  
27  
28  
29  
30  
31  
32  
33  
34  
35  
36  
37  
38  
39  
40  
41  
42  
43  
44  
45  
46  
47  
48  
49  
50  
51  
52  
53  
54  
55  
56  
57  
58  
59  
60  
61  
62  
63  
64  
65

664 the top right hand key, which indicates taxon assignment and (in brackets) the number of  
665 contigs and scaffolds so assigned, their total span, and their N50 length. The circles are  
666 scaled to scaffold length, as indicated in the key at the base of the main panel.

667 Right panel: Nucleotide span in kb at each coverage level.

668 Top panel: Nucleotide span in kb at each GC proportion.

669

670 **Figure 2. Comparisons of BRAKER1/soft-masked and original gene predictions**  
671 **from *H. bacteriophora***

672 (A, B) Frequency histograms of intron count (A) and protein length (B) in BRAKER1/soft-  
673 masked (blue) and published (yellow) protein coding gene predictions. Outlying proteins  
674 longer than >2500 amino-acids (n=40) or genes containing >60 introns (n=20) are not  
675 shown.

676 (C) Frequency histogram of the proportion of each BRAKER1 gene prediction overlapped  
677 by a published gene prediction at the nucleotide level.

678 (D) Comparison of singleton, proteome-specific, and shared proteins in the published and  
679 BRAKER1/soft-masked protein sets.

680 (E) Counts of non-canonical GC/AG introns in gene predictions from the published and  
681 BRAKER1 *H. bacteriophora* gene sets, and the model nematode *Caenorhabditis elegans*  
682 (WS258). Counts are of genes containing at least one non-canonical GC/AG intron with the  
683 specified number of non-canonical introns.

684

685 **Figure 3. Maximum likelihood phylogeny of selected rhabditine (Clade V)**  
686 **nematodes.**

687 A supermatrix of aligned amino acid sequences from orthologous loci from both *H.*  
688 *bacteriophora* predictions and a set of 23 rhabditine (Clade V) nematodes (see  
689 Supplementary Table 3) were aligned and analysed with RaxML using a PROTGAMMAGTR  
690 amino-acid substitution model. *Pristionchus* spp. were designated as the outgroup. Bootstrap  
691 support values (100 bootstraps performed) were 100 for all branches except one.

692

693

694

695

696

697

698

699

700

701

702

703

704

705

706

707

708

709



710 **Tables**

711 **Table I. Contamination screening of the *H. bacteriophora* assembly**

| <b>Number of scaffolds</b> | <b>Sum of scaffold spans (bp)</b> | <b>Mean coverage *</b> | <b>Best matches in NCBI nt database</b>                                    | <b>Assignment</b>                                                                            |
|----------------------------|-----------------------------------|------------------------|----------------------------------------------------------------------------|----------------------------------------------------------------------------------------------|
| 12                         | 99556                             | 2.8                    | <i>Stenotrophomonas maltophilia</i> genome                                 | bacterial culture contaminant **                                                             |
| 4                          | 4709                              | 0.1                    | <i>Photorhabdus</i> sp. genomes                                            | symbiont culture contaminant **                                                              |
| 2                          | 2144                              | 756.0                  | poorly annotated mitochondrial matches                                     | <i>H. bacteriophora</i> mitochondrial fragments                                              |
| 22                         | 3051844                           | 69.6                   | mariner transposons in Metazoa, especially Hymenoptera and Platyhelminthes | <i>H. bacteriophora</i> nuclear genome mariner transposon family (highest coverage 960-fold) |
| 10                         | 334100                            | 76.6                   | low score match to several histone H3.3 across Metazoa                     | <i>H. bacteriophora</i> nuclear sequence                                                     |
| 7                          | 713932                            | 56.5                   | chance nucleotide matches to conserved genes in other taxa                 | <i>H. bacteriophora</i> nuclear sequences                                                    |

712

713 \* The average read coverage of the whole assembly was 85.3.

714 \*\* These scaffolds were removed by the low-coverage filter.

715

716

717

718

719

720

1  
2  
3  
4  
5  
6  
7  
8  
9  
10  
11  
12  
13  
14  
15  
16  
17  
18  
19  
20  
21  
22  
23  
24  
25  
26  
27  
28  
29  
30  
31  
32  
33  
34  
35  
36  
37  
38  
39  
40  
41  
42  
43  
44  
45  
46  
47  
48  
49  
50  
51  
52  
53  
54  
55  
56  
57  
58  
59  
60  
61  
62  
63  
64  
65

721 **Table 2. Comparison of the published and BRAKER1/soft-masked protein coding**  
 722 **gene predictions.**

| <i>Prediction set</i>                                        | <i>Published [13]</i> | <i>BRAKER1/soft-masked</i> |
|--------------------------------------------------------------|-----------------------|----------------------------|
| Number of protein coding genes predicted                     | 20964                 | 1,747                      |
| Mean protein length (amino acids)                            | 218.8                 | 344.5                      |
| Number of single exon genes                                  | 1728                  | 2326                       |
| Mean number of exons per gene*                               | 5.9                   | 7.8                        |
| Proportion of non-canonical (GC-AG) introns                  | 8.87%                 | 0.79%                      |
| Percentage mapping to publicly available transcriptome reads |                       |                            |
| <i>Sanger ESTs</i>                                           | 80.45%                | 84.26%                     |
| <i>Roche 454 reads</i>                                       | 37.18%                | 58.03%                     |
| BUSCO score for proteome                                     |                       |                            |
| <i>Complete</i>                                              | 47.8%                 | 94%                        |
| <i>Fragmented</i>                                            | 34.7%                 | 4.3%                       |
| Number of proteins with no hits in Uniref90                  | 8,962                 | 2,889                      |
| Protein singletons in clustering                             | 5442                  | 1112                       |
| Conserved, single-copy orthologues**                         |                       |                            |
| <i>Total</i>                                                 | 2089                  | 2330                       |
| <i>Missing</i>                                               | 377                   | 141                        |
| <i>Expanded</i>                                              | 184                   | 84                         |

723  
 724 \* Number of exons: number of coding DNA sequence (CDS) entries per gene for  
 725 BRAKER1 predictions. CDS features, not exons are outputted by AUGUSTUS in general  
 726 feature format (GFF).

727 \*\* The list of strict one-to-one orthologues was augmented with protein clusters where  
 728 75% of species had single copy representatives (“fuzzy-1-to-1” orthologues identified by  
 729 KinFin).

730

731

732

733

734 **Supplementary Files**

735 The supplementary files for this work are described below. All Supplementary files are  
736 available at <https://github.com/DRL/mclean2017>.

737 **Supplementary file 1: Scaffolds and contigs removed from the *Heterorhabditis***  
738 ***bacteriophora* assembly because of low coverage in the new whole genome**  
739 **sequencing dataset**

740 Text file.

741 **Supplementary File 2: BRAKER1/soft-masked annotations of *Heterorhabditis***  
742 ***bacteriophora*.**

743 A zipped archive (14.1 Mb) of the BRAKER1/soft-masked annotations of *Heterorhabditis*  
744 *bacteriophora*. The archive contains three text files: the GFF format file, the GTF format file  
745 and the amino acid sequences of the protein predictions in FASTA format.

746 **Supplementary File 3: BRAKER1/hard-masked annotations of *Heterorhabditis***  
747 ***bacteriophora*.**

748 A zipped archive (13.4 Mb) of the BRAKER1/hard-masked annotations of *Heterorhabditis*  
749 *bacteriophora*. The archive contains three text files: the GFF format file, the GTF format file  
750 and the amino acid sequences of the protein predictions in FASTA format.

751 **Supplementary File 4: Comparison of the BRAKER1/soft-masked and**  
752 **BRAKER1/hard-masked gene predictions from *Heterorhabditis bacteriophora*.**

753 Tab-delimited text file.

754 **Supplementary File 5: OrthoFinder analyses of *Heterorhabditis bacteriophora***

755 **predicted proteomes.**

756 A zipped archive (20.3 Mb) of the OrthoFinder analyses of *Heterorhabditis bacteriophora*

757 predicted proteomes with 23 other nematode species. The archive contains the following

758 files:

759 SF5.1 A list of the proteomes included in the OrthoFinder analyses (text format file)

760 SF5.2 List of *Heterorhabditis bacteriophora* proteins of length <30 amino acids excluded from

761 the OrthoFinder analyses (text format file).

762 SF5.3 The OrthoFinder output files. A zipped archive of the three OrthoFinder clustering

763 result files (published *H. bacteriophora* + 23 species; BRAKER1/soft-masked + 23 species:

764 published + soft-masked + 23 species).

765 SF5.4 Table with count of orthogroups at each contribution ratio from the BRAKER1/soft-

766 masked and published proteomes after clustering with 23 other Clade V nematodes.

767 **Supplementary File 6: KinFin analyses of *Heterorhabditis bacteriophora* predicted**

768 **proteomes.**

769 A zipped archive (27.8 Mb) of the KinFin analyses from the OrthoFinder analyses of

770 *Heterorhabditis bacteriophora* predicted proteomes.

1  
2 **772** **Supplementary File 7: Phylogenetic analyses of *Heterorhabditis bacteriophora***  
3 **predicted proteomes.**

4  
5  
6 **773** A zipped archive (11.2 Mb) of the supermatrix alignment and the phylogenetic trees  
7  
8 **774** produced for the the analyses of the *Heterorhabditis bacteriophora* proteomes. The archive  
9  
10 **775** contains the following files:

11  
12  
13  
14 **776** SF7.1 Alignments of orthogroups used to build the supermatrix (directory of aligned  
15  
16 **777** sequences in fasta format).

17  
18  
19 **778** SF7.2 Supermatrix of aligned sequences (FASTA .fas format file).

20  
21  
22  
23 **779** SF7.3 Phylogenetic analysis output files (NEWICK format text file).

24  
25  
26 **780** **Supplementary File 8: Secretome analyses of *Heterorhabditis bacteriophora***  
27 **predicted proteomes.**

28  
29  
30  
31  
32 **782** Secretome analyses of *Heterorhabditis bacteriophora* and other rhabditine nematodes. The  
33  
34 **783** zipped archive (8 kb) contains the following text format files.

35  
36  
37  
38 **784** SF8.1 Secretome predictions from the published Bai *et al.* (2013) protein predictions.

39  
40  
41  
42 **785** SF8.2 Secretome predictions from the BRAKER1/soft-masked predictions.

43  
44  
45 **786** **Supplementary File 9: BRAKER1 and JIGSAW annotation pipelines.**

46  
47  
48  
49 **787** Figure illustrating the differences between the BRAKER1 and the Bai *et al* 2013 JIGSAW  
50  
51 **788** prediction methods used for *Heterorhabditis bacteriophora*. PDF file.

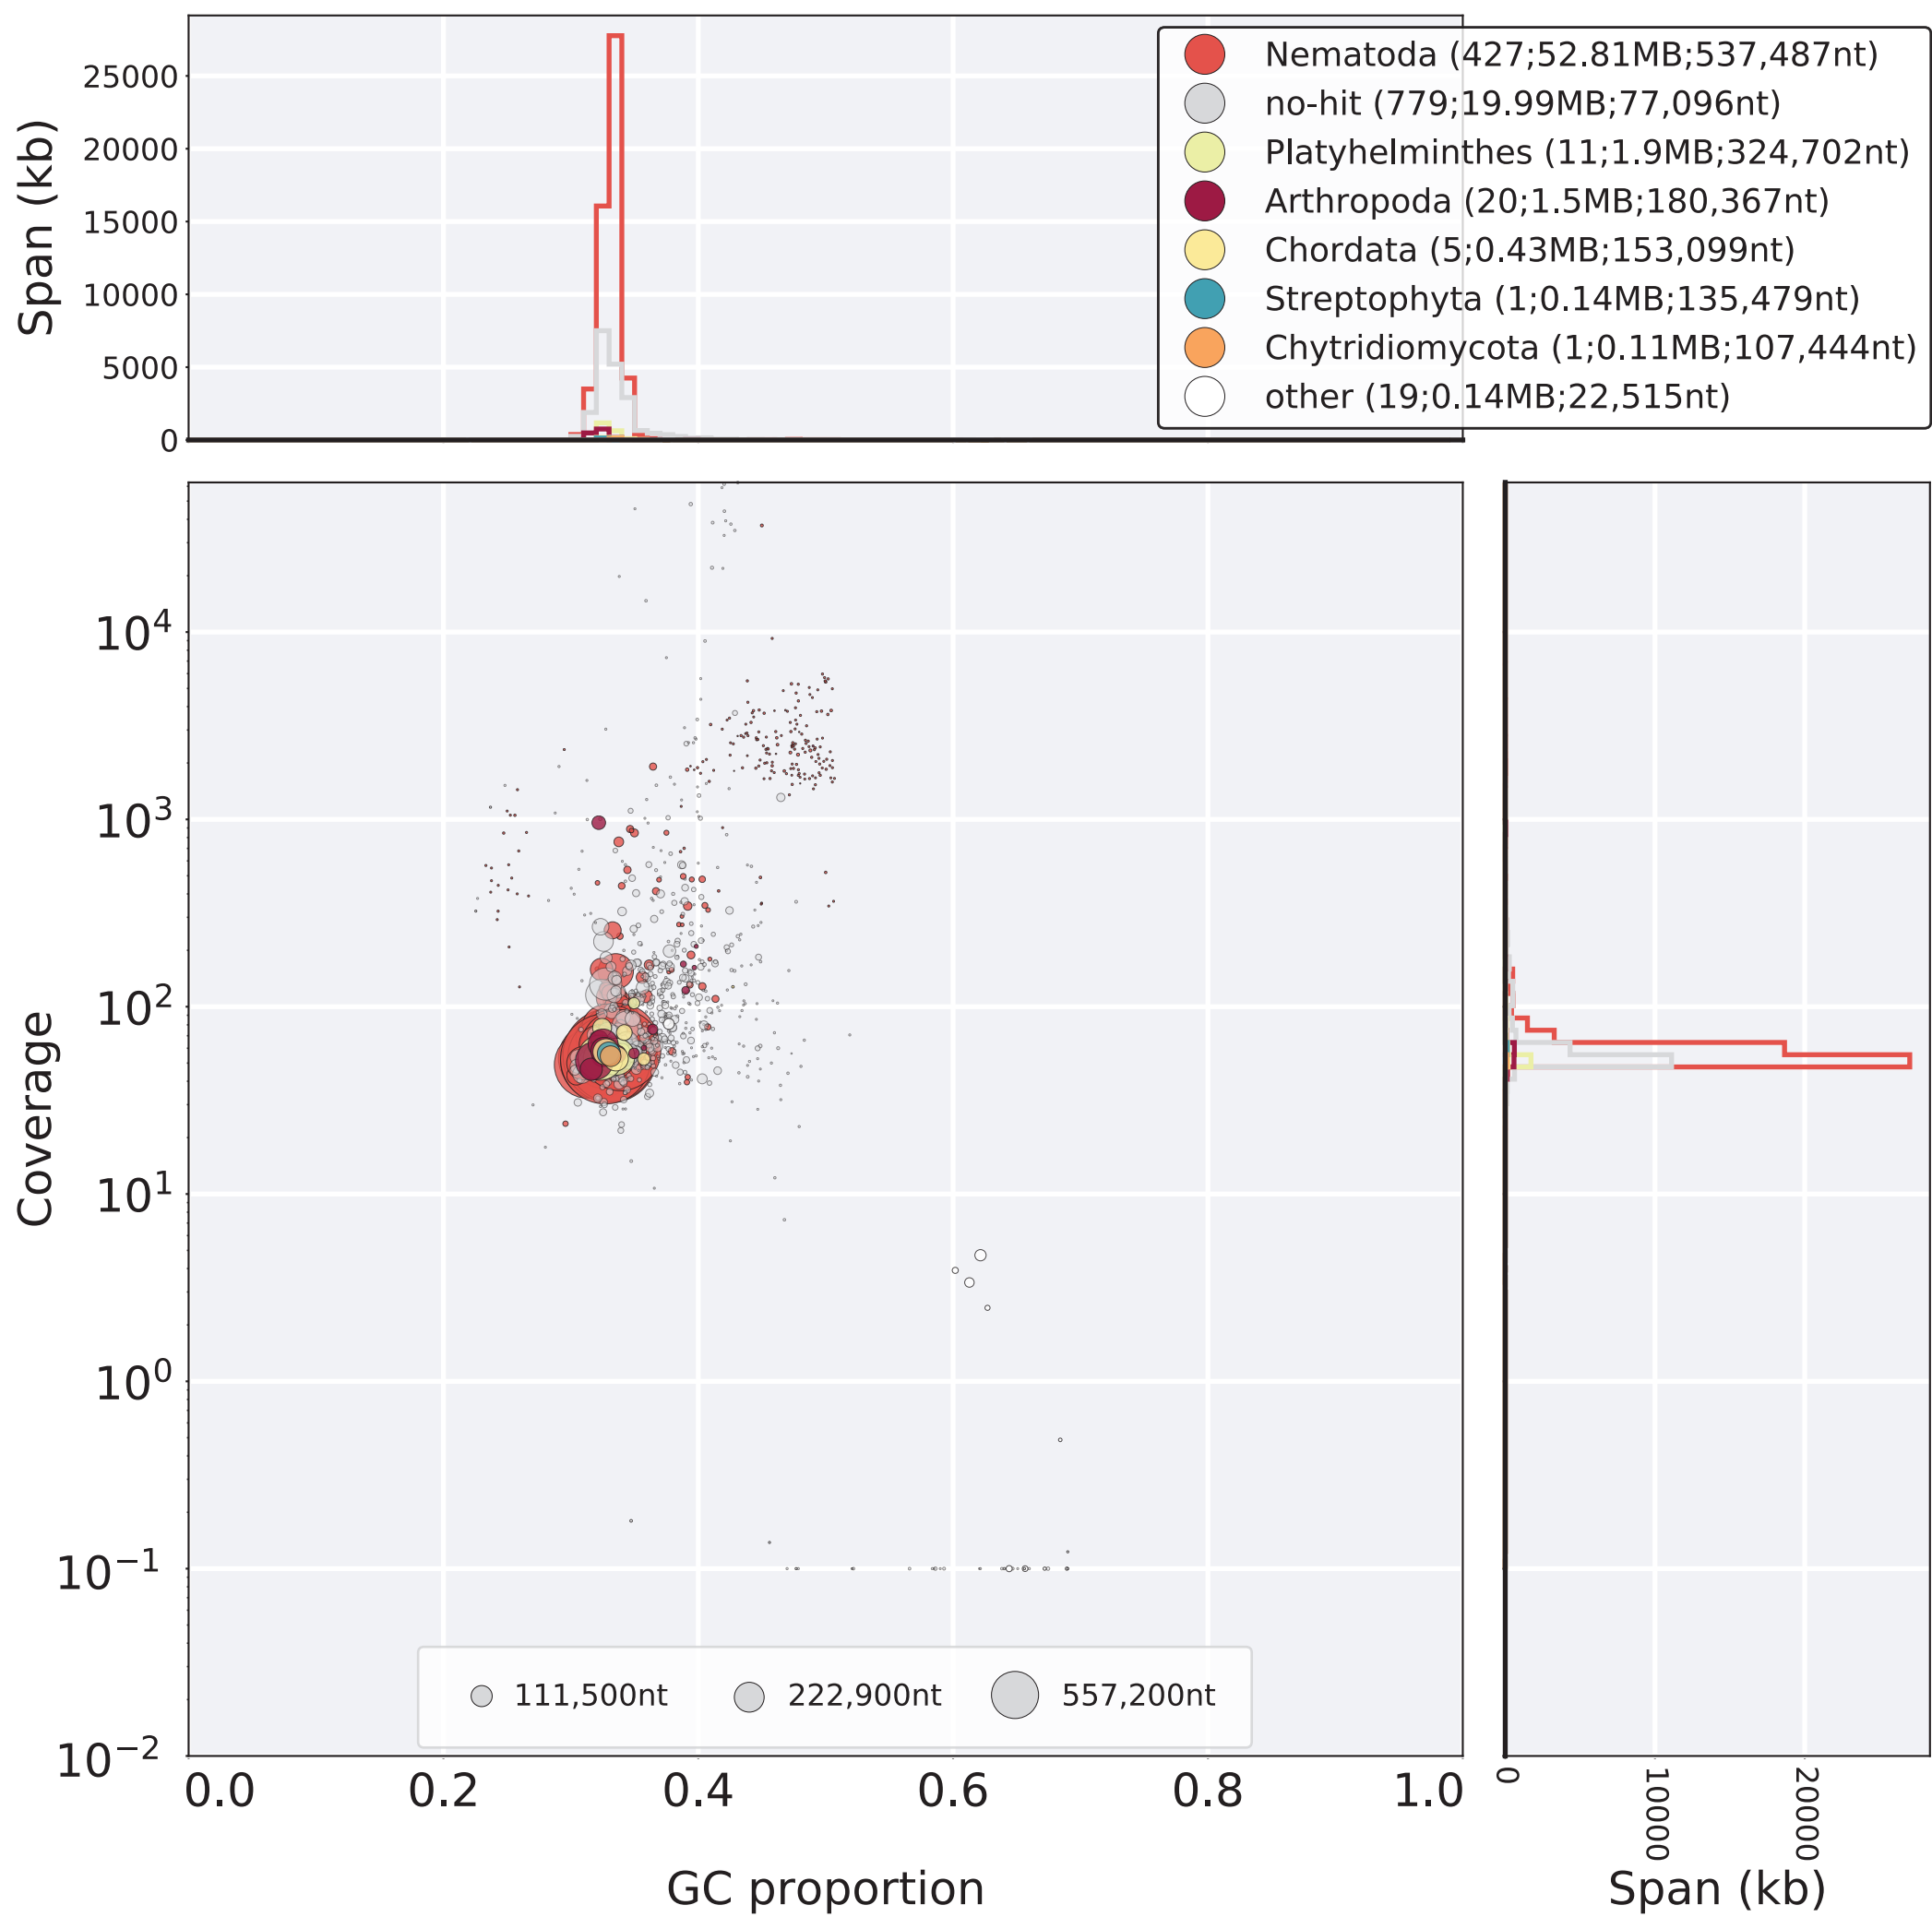

Figure 2

[Click here to download Figure Figure\\_2.pdf](#)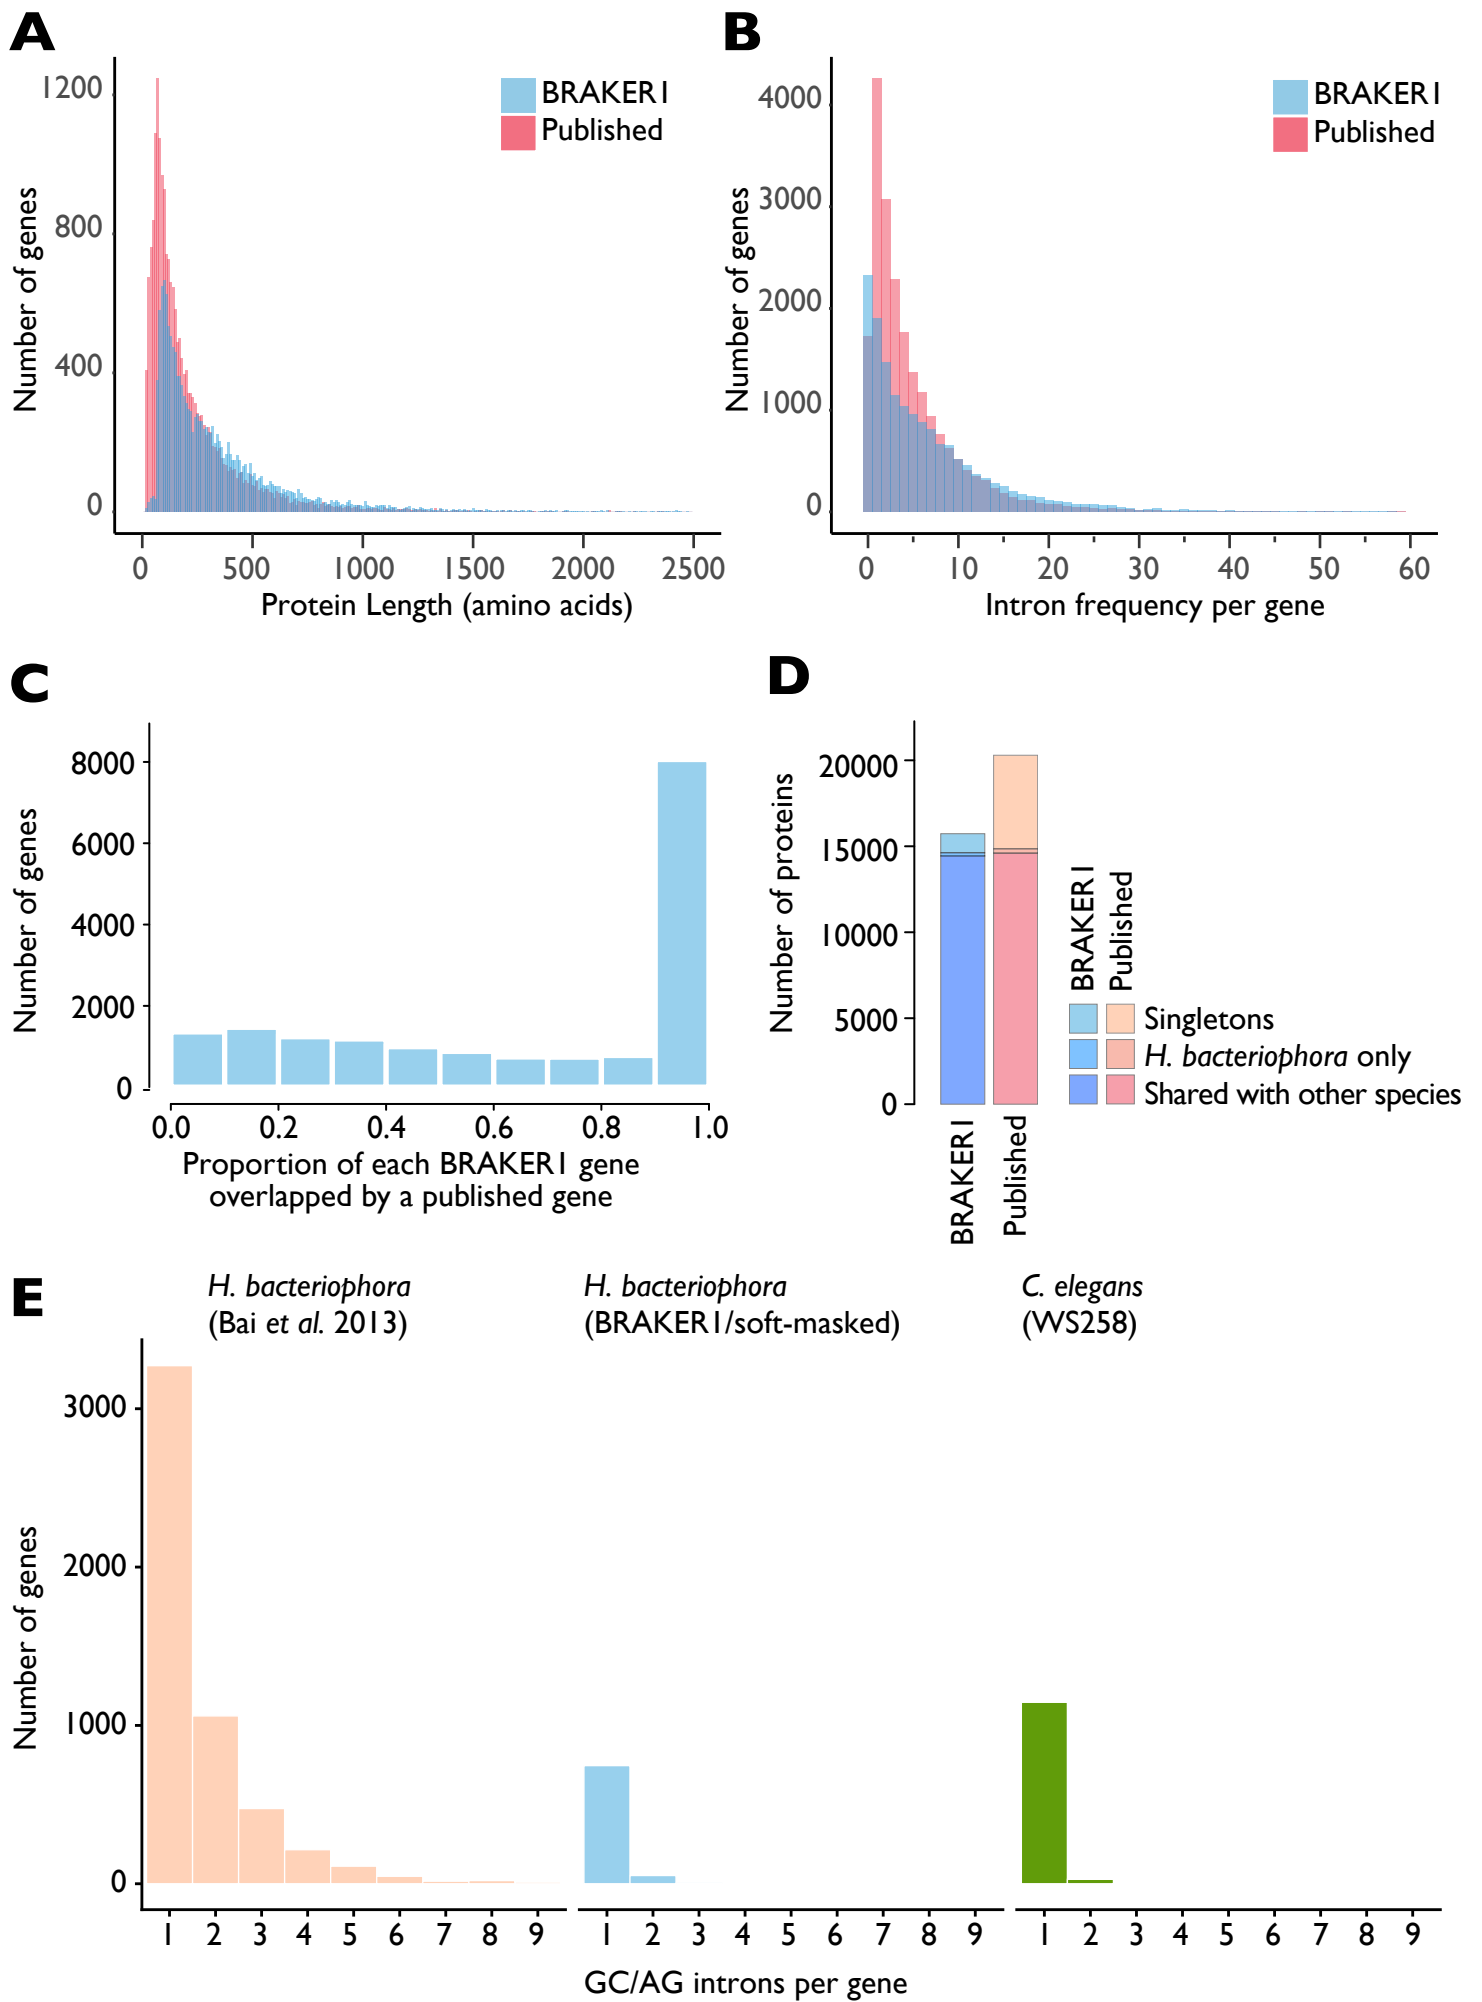

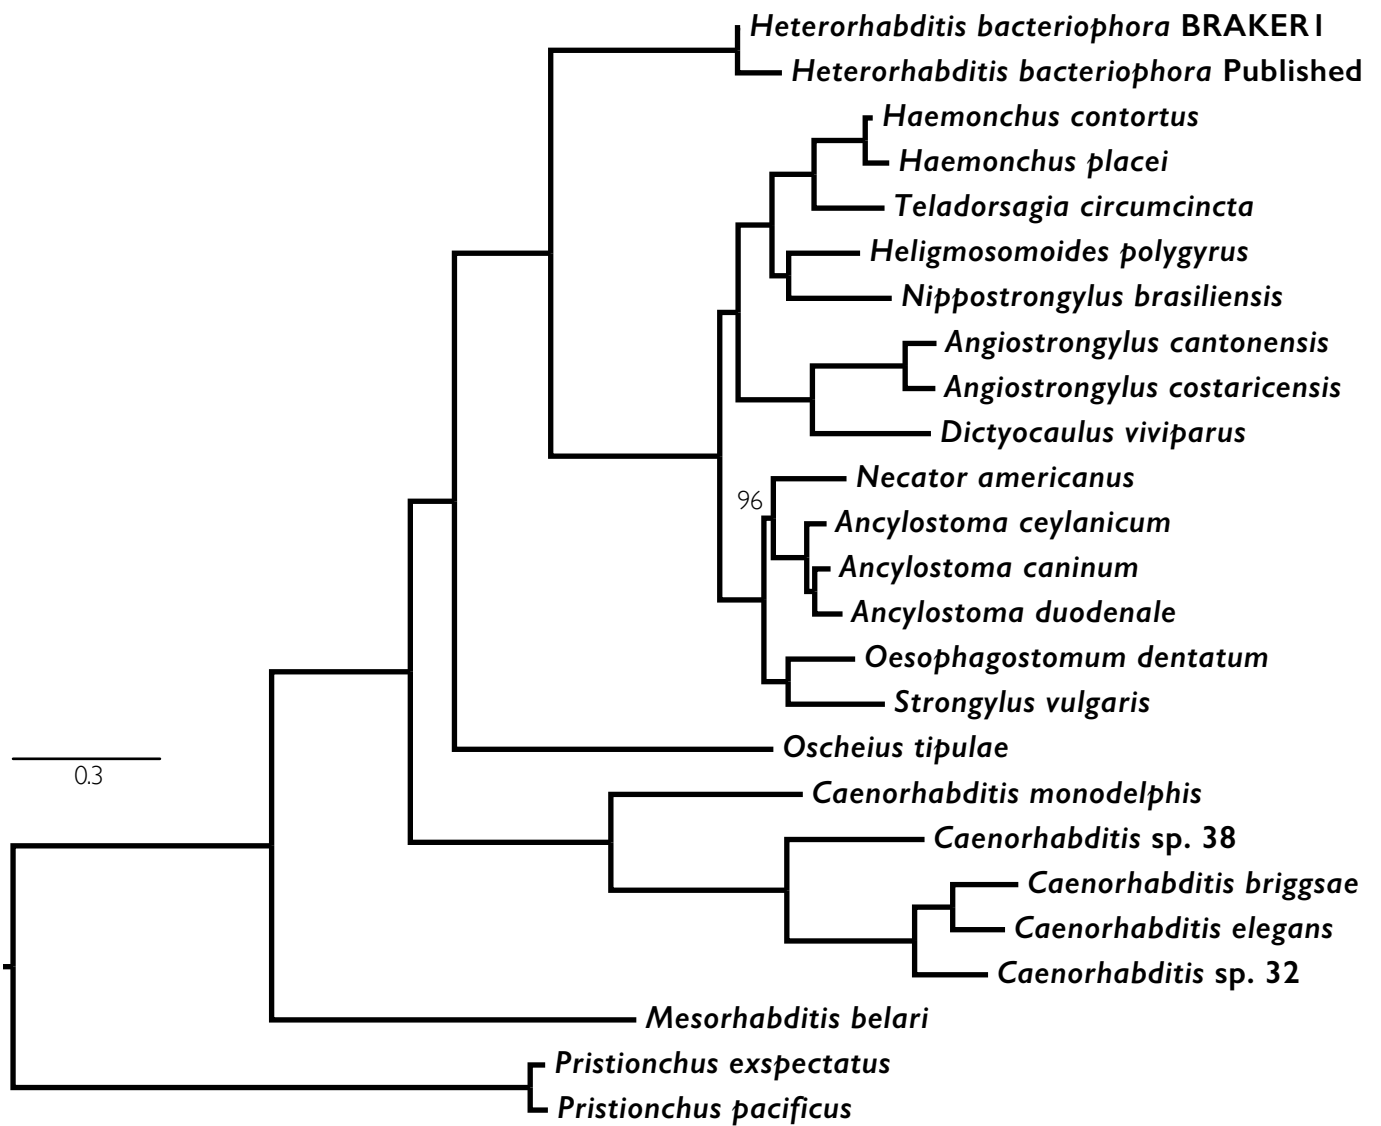

Supplement: giy034_giga-d-17-00297_original_submission.pdf [file giy034_giga-d-17-00297_original_submission.pdf]
