# Supplementary material for: Improving the annotation of the Heterorhabditis bacteriophora genome
Source: PubMed Central journal article supplement (PMC5906903; doi:10.1093/gigascience/giy034), 2018-04-02

|                                                      |                                                                                                                                                                                                                                                                                                                                                                                                                                                                                                                                                                                                                                                                                                                                                                                                                                                                                                                                                                                                                                                                                                                                                                                                                                                                                                                                                                                                                                                                                                                                                                                          |                    |
|------------------------------------------------------|------------------------------------------------------------------------------------------------------------------------------------------------------------------------------------------------------------------------------------------------------------------------------------------------------------------------------------------------------------------------------------------------------------------------------------------------------------------------------------------------------------------------------------------------------------------------------------------------------------------------------------------------------------------------------------------------------------------------------------------------------------------------------------------------------------------------------------------------------------------------------------------------------------------------------------------------------------------------------------------------------------------------------------------------------------------------------------------------------------------------------------------------------------------------------------------------------------------------------------------------------------------------------------------------------------------------------------------------------------------------------------------------------------------------------------------------------------------------------------------------------------------------------------------------------------------------------------------|--------------------|
| <b>Manuscript Number:</b>                            | GIGA-D-17-00297R1                                                                                                                                                                                                                                                                                                                                                                                                                                                                                                                                                                                                                                                                                                                                                                                                                                                                                                                                                                                                                                                                                                                                                                                                                                                                                                                                                                                                                                                                                                                                                                        |                    |
| <b>Full Title:</b>                                   | Improving the annotation of the Heterorhabditis bacteriophora genome                                                                                                                                                                                                                                                                                                                                                                                                                                                                                                                                                                                                                                                                                                                                                                                                                                                                                                                                                                                                                                                                                                                                                                                                                                                                                                                                                                                                                                                                                                                     |                    |
| <b>Article Type:</b>                                 | Data Note                                                                                                                                                                                                                                                                                                                                                                                                                                                                                                                                                                                                                                                                                                                                                                                                                                                                                                                                                                                                                                                                                                                                                                                                                                                                                                                                                                                                                                                                                                                                                                                |                    |
| <b>Funding Information:</b>                          | Wellcome Trust<br>(204052/Z/16/Z)                                                                                                                                                                                                                                                                                                                                                                                                                                                                                                                                                                                                                                                                                                                                                                                                                                                                                                                                                                                                                                                                                                                                                                                                                                                                                                                                                                                                                                                                                                                                                        | Dr Florence McLean |
| <b>Abstract:</b>                                     | <p>Genome assembly and annotation remains an exacting task. As the tools available for these tasks improve, it is useful to return to data produced with earlier instances to assess their credibility and correctness. The entomopathogenic nematode <i>Heterorhabditis bacteriophora</i> is widely used to control insect pests in horticulture. The genome sequence for this species was reported to encode an unusually high proportion of unique proteins and a paucity of secreted proteins compared to other related nematodes. We revisited the <i>H. bacteriophora</i> genome assembly and gene predictions to ask whether these unusual characteristics were biological or methodological in origin. We mapped an independent resequencing dataset to the genome and used the blobtools pipeline to identify potential contaminants. While present (0.2% of the genome span, 0.4% of predicted proteins), assembly contamination was not significant. Re-prediction of the gene set using BRAKER1 and published transcriptome data generated a predicted proteome that was very different from the published one. The new gene set had a much reduced complement of unique proteins, better completeness values that were in line with other related species' genomes, and an increased number of proteins predicted to be secreted. It is thus likely that methodological issues drove the apparent uniqueness of the initial <i>H. bacteriophora</i> genome annotation and that similar contamination and misannotation issues affect other published genome assemblies.</p> |                    |
| <b>Corresponding Author:</b>                         | Florence McLean, BM BCh, MSc(R)<br>University of Edinburgh<br>Edinburgh, UNITED KINGDOM                                                                                                                                                                                                                                                                                                                                                                                                                                                                                                                                                                                                                                                                                                                                                                                                                                                                                                                                                                                                                                                                                                                                                                                                                                                                                                                                                                                                                                                                                                  |                    |
| <b>Corresponding Author Secondary Information:</b>   |                                                                                                                                                                                                                                                                                                                                                                                                                                                                                                                                                                                                                                                                                                                                                                                                                                                                                                                                                                                                                                                                                                                                                                                                                                                                                                                                                                                                                                                                                                                                                                                          |                    |
| <b>Corresponding Author's Institution:</b>           | University of Edinburgh                                                                                                                                                                                                                                                                                                                                                                                                                                                                                                                                                                                                                                                                                                                                                                                                                                                                                                                                                                                                                                                                                                                                                                                                                                                                                                                                                                                                                                                                                                                                                                  |                    |
| <b>Corresponding Author's Secondary Institution:</b> |                                                                                                                                                                                                                                                                                                                                                                                                                                                                                                                                                                                                                                                                                                                                                                                                                                                                                                                                                                                                                                                                                                                                                                                                                                                                                                                                                                                                                                                                                                                                                                                          |                    |
| <b>First Author:</b>                                 | Florence McLean                                                                                                                                                                                                                                                                                                                                                                                                                                                                                                                                                                                                                                                                                                                                                                                                                                                                                                                                                                                                                                                                                                                                                                                                                                                                                                                                                                                                                                                                                                                                                                          |                    |
| <b>First Author Secondary Information:</b>           |                                                                                                                                                                                                                                                                                                                                                                                                                                                                                                                                                                                                                                                                                                                                                                                                                                                                                                                                                                                                                                                                                                                                                                                                                                                                                                                                                                                                                                                                                                                                                                                          |                    |
| <b>Order of Authors:</b>                             | Florence McLean<br>Duncan Berger<br>Dominik R Laetsch<br>Hillel T Schwartz<br>Mark Blaxter                                                                                                                                                                                                                                                                                                                                                                                                                                                                                                                                                                                                                                                                                                                                                                                                                                                                                                                                                                                                                                                                                                                                                                                                                                                                                                                                                                                                                                                                                               |                    |
| <b>Order of Authors Secondary Information:</b>       |                                                                                                                                                                                                                                                                                                                                                                                                                                                                                                                                                                                                                                                                                                                                                                                                                                                                                                                                                                                                                                                                                                                                                                                                                                                                                                                                                                                                                                                                                                                                                                                          |                    |
| <b>Response to Reviewers:</b>                        | Date 05.03.2018<br><br>Dear GigaScience Editors,<br><br>Re: Resubmission of manuscript: Improving the annotation of the <i>Heterorhabditis bacteriophora</i> genome<br><br>Thank you for the opportunity to revise our manuscript, Improving the annotation of the                                                                                                                                                                                                                                                                                                                                                                                                                                                                                                                                                                                                                                                                                                                                                                                                                                                                                                                                                                                                                                                                                                                                                                                                                                                                                                                       |                    |

Heterorhabditis bacteriophora genome. After reviewing the GigaScience Article Types instructions we are re-submitting the manuscript for consideration for publication as a Data Note as we agree that it fits best as such.

We are grateful for the constructive and positive suggestions from all of the reviewers, as well as their attention to detail. In particular, we have added a supplementary document detailing the command lines used to carry out the analysis, and hope that this will prove useful to those wishing to replicate the experiments.

Below are the comments with our responses indicated. The accompanying manuscript has the corresponding corrections and changes.

Yours Sincerely,  
Florence McLean

Reviewer #1:  
-----

This manuscript describes the reannotation of the Heterorhabditis bacteriophora, an entomopathogenic nematode widely used to control insect pests in horticulture. A previous study was reported to encode an unusually high proportion of unique proteins and a paucity of secreted proteins compared to other related nematodes. This study asked whether these unusual characteristics were biological or methodological in origin.

The work was carried out in the spirit of data improvement, rather than a rebuttal, and while it is not a genome paper as such, it does reanalyse a genome using new data and different tools. It is very suited to the GigaScience philosophy and readership due to the repeatable side and open access component.

I have checked that the Methods described and the Resources used meet the minimum standards reporting check list. I note that data has been submitted to the publicly available repositories (SRA and INSDC) but that the data is not yet available, thus it cannot be reviewed at the moment.

\*\*\*\*\*Response\*\*\*\*\*

The reads from the re-sequencing project are still in the process of being submitted to the SRA and the DOI will be advised as soon as it is obtained.

Submission of the revised annotations to INSDC has been delayed over a question of where they would fit into the ENA's data structure. The GFF file has therefore been submitted to Zenodo (DOI:10.5281/zenodo.1169646), and is included in the supplementary data uploaded to the GigaScience DB.  
\*\*\*\*\*

I have looked at the files in <https://github.com/DRL/mclean2017>  
There are 9 supplementary files of annotation, analyses and annotation pipelines which look thorough and complete.

The repository also include splice site files.

The manuscript states that all custom scripts developed for this manuscript are available at in this repository but I see only a single script in the /analysis folder. Is this right?

\*\*\*\*\*Response\*\*\*\*\*

Very few custom scripts were developed for the analysis of the data, the bulk of which was carried out by executing published programs on the command line, and most basic statistics reported in the manuscript (such as counts) were obtained from manipulation and interrogation of files using unix command line tools. Although these processes were not developed as scripts, we strongly agree with both reviewer #1 here, and reviewer #3 (see below), that provision of the code used in the analysis would greatly enhance the manuscript. We have added a Methods Supplementary

Note (Supplementary File 2) to this effect.

\*\*\*\*\*

The gene prediction and protein orthology analyses and discussion were thorough and fully explained, as well as future work (expanded transcriptome and comparative data work) described.

My recommendation is that this manuscript be published as a research article.

I have some minor typos and suggestions which are probably more pertinent for a copy editor to spot but include them here since I noted them down.

105 BUSCO; see below). Another unusual feature of the H. bacteriophora gene set was the ->

105 BUSCO; see Table 2). Another unusual feature of the H. bacteriophora gene set was the

\*\*\*\*\*Response\*\*\*\*\*

Corrected

\*\*\*\*\*

107 Most nematode (and other metazoan) genomes have low proportions of non-canonical introns (less than 1%),  
[Reference needed]

\*\*\*\*\*Response\*\*\*\*\*

Reference provided

\*\*\*\*\*

137 from the new Illumina data and sequence similarity from the NCBI nucleotide database (nt) ->

137 from the new Illumina data and sequence similarity from the NCBI nucleotide (nt) database

\*\*\*\*\*Response\*\*\*\*\*

Corrected

\*\*\*\*\*

371 The assembly scaffolds were aligned to the NCBI nucleotide (nt) database, ->

371 The assembly scaffolds were aligned to the NCBI nt database,

\*\*\*\*\*Response\*\*\*\*\*

Corrected

\*\*\*\*\*

397 version of the assembly. Hard masking was for known Nematoda repeats from the ->

397 version of the assembly. The assembly was hard-masked for known Nematoda repeats from the...?

\*\*\*\*\*Response\*\*\*\*\*

Corrected

\*\*\*\*\*

[Hard masked / hard-masked

Soft masked / soft-masked

check for consistent use]

\*\*\*\*\*Response\*\*\*\*\*

Corrected to consistent use of hyphen

\*\*\*\*\*

406 bacteriophora annotation was identified from the general feature format file, and

then->  
406 bacteriophora annotation was identified from the general feature format (GFF) file,  
and then

\*\*\*\*\*Response\*\*\*\*\*  
Corrected  
\*\*\*\*\*

407 selected from the protein FASTA files. The general feature format file (GFF) for ->  
407 selected from the protein FASTA files. The GFF file for

\*\*\*\*\*Response\*\*\*\*\*  
Corrected  
\*\*\*\*\*

415 from the general feature format file as exon features ->  
415 from the GFF file as exon features

\*\*\*\*\*Response\*\*\*\*\*  
Corrected  
\*\*\*\*\*

423 bacteriophora. Intronic features were added to GFF3  
[Explain what GFF3 is]

Expanded to general feature format version 3 (GFF3)

[Check consistent use of GFF (line 415) / GFF file / GFF format (744, 749)  
Should be GFF file]

\*\*\*\*\*Response\*\*\*\*\*  
Corrected to be consistent  
\*\*\*\*\*

424 gff3 -sort -tidy -retainids -fixregionboundaries -addintrons') and and splice sites  
were ->  
424 gff3 -sort -tidy -retainids -fixregionboundaries -addintrons') and splice sites were

\*\*\*\*\*Response\*\*\*\*\*  
Corrected  
\*\*\*\*\*

445 the 23 Clade V nematodes were downloaded from WBPS8 (available at:  
446 <http://parasite.wormbase.org/index.html>)  
[Suggest link to <ftp://ftp.ebi.ac.uk/pub/databases/wormbase/parasite/releases/WBPS8/>)]

\*\*\*\*\*Response\*\*\*\*\*  
Link changed to that suggested  
\*\*\*\*\*

358 Parasite (WBPS8) [34].  
[This is the first mention of WormBase Parasite so should include the home page  
rather than line in 446]

\*\*\*\*\*Response\*\*\*\*\*  
Suggested link inserted into formerly line [358] and removed from formerly line [446]  
\*\*\*\*\*

478 using MAFFT v7.267 (RRID:SCR\_011811) [50], and the alignments trimmed with  
NOISY  
[Reference needed for NOISY.]

\*\*\*\*\*Response\*\*\*\*\*  
Reference added

\*\*\*\*\*

480 v8.1.20 (RRID:SCR\_006086) [51] with a PROTGAMMAGTR  
[Reference needed for PROTGAMMAGTR]

\*\*\*\*\*Response\*\*\*\*\*

Reference provided for RAXML. PROTGAMMAGTR is an option used within RAXML.  
\*\*\*\*\*

Reviewer #2:

-----  
The manuscript "Improving the annotation of the Heterorhabditis bacteriophora genome" presents the re-annotation of an existing high-quality genome assembly which previously had low-quality gene annotation with many issues. By utilizing RNA-Seq datasets and using the latest high-quality annotation tool (BRAKER1), significant improvements were made in completeness, unique protein counts and secretion predictions. This annotation improvement represents a very significant improvement in how results from Heterorhabditis bacteriophora genome studies will be interpreted.

- The supporting data files are thorough and complete, and support the findings. One suggestion: Although not part of the study, a text file could be added within Supp Tables 2 and 3 which provides the WormBase assembly version used, and accession IDs / web links to the genome assembly, so that readers can have all the information they need to work with the new annotation within the single files.

\*\*\*\*\*Response\*\*\*\*\*

Many thanks for your suggestion. I have added a text file into the Supporting data called Publicly\_available\_assembly\_details.txt which details the source, provider, WormBase assembly version used, its Bioproject ID, and the FTP address for easy download.  
\*\*\*\*\*

- Tables 1 and 2 in the main text should also be reformatted. Shading is not permitted by Gigascience. Also, removing vertical lines (both tables) and centering the numbers on table 1 would help to improve their look.

\*\*\*\*\*Response\*\*\*\*\*

Done- many thanks for the feedback  
\*\*\*\*\*

- Please ensure that SRA and INSDC accessions are added, since they are currently referenced as "XXXXXX"

\*\*\*\*\*Response\*\*\*\*\*

Please see comment above to reviewer # 1  
\*\*\*\*\*

- Since InterProScan was ran, it would be interesting to look at the statistics in regards to the identification of InterPro domains. For example, compare the number of proteins with any annotated IPR domains, the total number of IPR domains identified, and the number of unique IPR domains identified. The previous publication also performed this comparison with other species using KEGG, so it may be interesting to repeat that similar analysis with the current annotation, although there are many updated ways to run KEGG so the re-analysis of the previous annotation may not match what was previously found.

\*\*\*\*\*Response\*\*\*\*\*

Thank you for this suggestion. Extraction of these interproscan statistics did provide further encouraging results. We have included a Supporting data file called IPR.domain.analysis.txt containing the suggested Interproscan statistics and a paragraph has been added to the text to describe the results. We do not feel that the original Kegg analysis in the published paper generated meaningful biological insights and have therefore not replicated it here.  
\*\*\*\*\*

Reviewer #3:

-----

Dear authors,

thank you for publishing the re-annotation of Heterorhabditis bacteriophora. It is both interesting for the particular research community dealing with Heterorhabditis bacteriophora, as well as for all research communities dealing with non-model organisms, in general. You demonstrate that the software applied for annotating a species can heavily impact conclusions drawn from a genome annotation project; and that it is worth re-annotating also non-model organisms with state of the art tools.

Below, you find my review, structured according to the Guide for GigaScience reviewers.

1. Is the rationale for collecting and analyzing the data well defined?

Yes.

2. Is it clear how data was collected and curated?

Yes, it is very clear.

3. Is it clear - and was a statement provided - on how data and analyses tools used in the study can be accessed?

For data, it is very clear.

The authors also make an effort to demonstrate tool availability (not their own, but software developed by others) by providing RRIDs. However, in some cases, the provided RRIDs are more confusing than helpful.

RRID:SCR\_008419 is given for BLAST v2.6.0+ but the RRID leads to an URL that is not available (and in the past, when it was available, it corresponded to a particular BLAST interface for blasting against Aedes aegypti, an organism that is not relevant to the manuscript under review). In this case, it would be more helpful to provide e.g. an URL to the download location of BLAST v2.6.0+; or create a new RRID.

\*\*\*\*\*Response\*\*\*\*\*

Apologies for this error, thank you for noting it. A URL for downloading BLAST v2.6.0 has been provided and the incorrect RRID removed.

\*\*\*\*\*

RRID:SCR\_005622 is given for the RNA-Seq aligner STAR; the RRID leads to an URL for a user/password protected STAR related web application. I strongly assume the authors ran STAR locally, and thus, an URL to the official STAR website would be more appropriate (<https://github.com/alexdobin/STAR/releases>), or the creation of a new RRID.

\*\*\*\*\*Response\*\*\*\*\*

RRID corrected to the official website version

\*\*\*\*\*

For Rstudio, accidentally, the RRID to STAR web application is provided. Please update to correct RRID or URL.

\*\*\*\*\*Response\*\*\*\*\*

Corrected- thank you again for noting this error.

\*\*\*\*\*

(No RRID or URL is provided for BRAKER. The URL is available in the referenced manuscript, though, and I believe that is sufficient. However, if journal policy is to always print RRIDs or URLs, you might want to add one of the download URLs. Also, BRAKER1 is the only tool where to do not list the version number (braker.pl --version).)

Version added.

4. Are accession numbers given or links provided for data that, as a standard, should be submitted to a community approved public repository?

In principle, yes, some accession numbers were still missing during the review process but will be updated by the authors prior publication.

5. Is the data and software available in the public domain under a Creative Commons license?

Scripts implemented particularly for this publication are available at github, the license is GNU Public License V3. There are differences between licenses, I kindly ask the journal to check whether GPL fulfills the journal's requirements.

6. Are the data sound and well controlled?

Yes.

7. Is the interpretation (Analysis and Discussion) well balanced and supported by the data?

Yes.

8. Are the methods appropriate, well described, and include sufficient details and supporting information to allow others to evaluate and replicate the work?

In principle: yes. However, it might be useful to the community to provide not only references to the particular tool and version, but also the exact command lines that were used in this project. It would be really nice if you added the command lines to some supplementary document. For example, a reader who knows that BRAKER1 software, will assume that braker was called with the option --softmasking when the authors state that it was applied to a softmasked genome. A reader who is less familiar with the software will maybe not know this and might thus not be able to replicate the experiments, exactly.

\*\*\*\*\*Response\*\*\*\*\*

Thank you for this suggestion, we agree and a Supplementary note has been added to this effect.

\*\*\*\*\*

9. What are the strengths and weaknesses of the methods?

The authors used state of the art methods in a very suitable way.

10. Have the authors followed best-practices in reporting standards?

Yes.

11. Can the writing, organization, tables and figures be improved?

I am not a native speaker of English, myself, but I believe the language is good.

I hope that 1.747 as number of protein coding genes predicted by BRAKER1/soft-masked in Table 2 is a typo, please fix.

\*\*\*\*\*Response\*\*\*\*\*

Corrected- thank you for spotting this

\*\*\*\*\*

12. When revisions are requested.

Minor revisions:

|                                                                                                                                                                                                                                                                                                                                                                                                                                                                                                                                     |                                                                                                                                                                                                                                                                                                                                                                                                                                                                                                                                                                |
|-------------------------------------------------------------------------------------------------------------------------------------------------------------------------------------------------------------------------------------------------------------------------------------------------------------------------------------------------------------------------------------------------------------------------------------------------------------------------------------------------------------------------------------|----------------------------------------------------------------------------------------------------------------------------------------------------------------------------------------------------------------------------------------------------------------------------------------------------------------------------------------------------------------------------------------------------------------------------------------------------------------------------------------------------------------------------------------------------------------|
|                                                                                                                                                                                                                                                                                                                                                                                                                                                                                                                                     | <p>Please correct used software accessibility references as recommended in point 3.- corrected as above</p> <p>Please correct typo in Table 2 (point 11).- corrected as above.</p> <p>Discretionary revisions:</p> <p>Please consider my statement to point 8.- corrected as above</p> <p>The journal should probably have a look at the license issue (point 5).</p> <p>13. Are there any ethical or competing interests issues you would like to raise?</p> <p>No.</p> <p>I hope you find this review useful.</p> <p>Kind regards,</p> <p>Katharina Hoff</p> |
| <b>Additional Information:</b>                                                                                                                                                                                                                                                                                                                                                                                                                                                                                                      |                                                                                                                                                                                                                                                                                                                                                                                                                                                                                                                                                                |
| <b>Question</b>                                                                                                                                                                                                                                                                                                                                                                                                                                                                                                                     | <b>Response</b>                                                                                                                                                                                                                                                                                                                                                                                                                                                                                                                                                |
| Are you submitting this manuscript to a special series or article collection?                                                                                                                                                                                                                                                                                                                                                                                                                                                       | No                                                                                                                                                                                                                                                                                                                                                                                                                                                                                                                                                             |
| <p><b>Experimental design and statistics</b></p> <p>Full details of the experimental design and statistical methods used should be given in the Methods section, as detailed in our <a href="#">Minimum Standards Reporting Checklist</a>. Information essential to interpreting the data presented should be made available in the figure legends.</p> <p>Have you included all the information requested in your manuscript?</p>                                                                                                  | Yes                                                                                                                                                                                                                                                                                                                                                                                                                                                                                                                                                            |
| <p><b>Resources</b></p> <p>A description of all resources used, including antibodies, cell lines, animals and software tools, with enough information to allow them to be uniquely identified, should be included in the Methods section. Authors are strongly encouraged to cite <a href="#">Research Resource Identifiers</a> (RRIDs) for antibodies, model organisms and tools, where possible.</p> <p>Have you included the information requested as detailed in our <a href="#">Minimum Standards Reporting Checklist</a>?</p> | Yes                                                                                                                                                                                                                                                                                                                                                                                                                                                                                                                                                            |



**Availability of data and materials**

Yes

All datasets and code on which the conclusions of the paper rely must be either included in your submission or deposited in [publicly available repositories](#) (where available and ethically appropriate), referencing such data using a unique identifier in the references and in the “Availability of Data and Materials” section of your manuscript.

Have you have met the above requirement as detailed in our [Minimum Standards Reporting Checklist](#)?

# Improving the annotation of the *Heterorhabditis bacteriophora* genome

Florence McLean<sup>1</sup>, Duncan Berger<sup>1</sup>, Dominik R. Laetsch<sup>1</sup>, Hillel T. Schwartz<sup>2</sup> and Mark Blaxter<sup>1</sup>

<sup>1</sup> Institute of Evolutionary Biology, University of Edinburgh, Edinburgh EH9 3JT, UK

<sup>2</sup> Division of Biology and Biological Engineering, California Institute of Technology, Pasadena, California, USA

*email addresses and ORCID*

Florence McLean [f.e.mclean@sms.ed.ac.uk](mailto:f.e.mclean@sms.ed.ac.uk) 0000-0001-8218-4904

Duncan Berger [duncan.berger@bath.edu](mailto:duncan.berger@bath.edu) 0000-0002-2017-6623

Dominik R. Laetsch [dominik.laetsch@gmail.com](mailto:dominik.laetsch@gmail.com) 0000-0001-7887-0186

Hillel Schwartz [hillels@caltech.edu](mailto:hillels@caltech.edu) 0000-0002-3448-8652

Mark Blaxter [mark.blaxter@ed.ac.uk](mailto:mark.blaxter@ed.ac.uk) 0000-0003-2861-949X

28 **Abstract**

29 **Background:** Genome assembly and annotation remains an exacting task. As the  
30 tools available for these tasks improve, it is useful to return to data produced with  
31 earlier instances to assess their credibility and correctness. The entomopathogenic  
32 nematode *Heterorhabditis bacteriophora* is widely used to control insect pests in  
33 horticulture. The genome sequence for this species was reported to encode an  
34 unusually high proportion of unique proteins and a paucity of secreted proteins  
35 compared to other related nematodes. **Findings:** We revisited the *H. bacteriophora*  
36 genome assembly and gene predictions to ask whether these unusual characteristics  
37 were biological or methodological in origin. We mapped an independent resequencing  
38 dataset to the genome and used the blobtools pipeline to identify potential  
39 contaminants. While present (0.2% of the genome span, 0.4% of predicted proteins),  
40 assembly contamination was not significant. **Conclusions:** Re-prediction of the gene  
41 set using BRAKER1 and published transcriptome data generated a predicted  
42 proteome that was very different from the published one. The new gene set had a  
43 much reduced complement of unique proteins, better completeness values that were  
44 in line with other related species' genomes, and an increased number of proteins  
45 predicted to be secreted. It is thus likely that methodological issues drove the apparent  
46 uniqueness of the initial *H. bacteriophora* genome annotation and that similar  
47 contamination and misannotation issues affect other published genome assemblies.

48

49

## 50 Background

1  
2  
3  
4 51 The sequencing and annotation of a species' genome is often but the first step in  
5  
6 52 exploiting these data for comprehensive biological understanding. As with all scientific  
7  
8 53 endeavour, genome sequencing technologies and the bioinformatics toolkits available  
9  
10  
11 54 for assembly and annotation are being continually improved. It should come as no  
12  
13 55 surprise therefore that first estimates of genome sequences and descriptions of the  
14  
15  
16 56 genes they contain can be improved. For example, the genome of the nematode  
17  
18 57 *Caenorhabditis elegans* was the first animal genome to be sequenced [1]. The  
19  
20  
21 58 genome sequence and annotations have been updated many times since, as further  
22  
23 59 exploration of this model organism revealed errors in original predictions, such that  
24  
25 60 today, with release WS260 [2] [3], very few of the 19099 protein coding genes  
26  
27  
28 61 announced in the original publication [1] retain their original structure and sequence.  
29  
30  
31 62 The richness of the annotation of *C. elegans* is driven by the size of the research  
32  
33 63 community that uses this model species. However for most species, where the  
34  
35 64 community using the genome data is small or less-well funded, initial genome  
36  
37  
38 65 sequences and gene predictions are not usually updated.

39  
40  
41 66 *Heterorhabditis bacteriophora* is an entomopathogenic nematode which maintains a  
42  
43 67 mutualistic association with the bacterium *Photorhabdus luminescens*. Unlike many  
44  
45  
46 68 other parasitic nematodes, it is amenable to *in vitro* culture [4] and is therefore of  
47  
48  
49 69 interest not only to evolutionary and molecular biologists investigating parasitic and  
50  
51 70 symbiotic systems, but also to those concerned with the biological control of insect  
52  
53 71 pests [5, 6]. *P. luminescens* colonises the anterior intestine of the free-living infective  
54  
55  
56 72 juvenile stage (IJ). IJs are attracted to insect prey by chemical signals [7, 8]. On  
57  
58 73 contacting a host, the IJs invade the insect's haemocoel and actively regurgitate *P.*

74 *luminescens* into the haemolymph. The bacterial infection rapidly kills the insect, and  
75 *H. bacteriophora* grow and reproduce within the cadaver. After 2-3 cycles of  
76 replication, the nematode progeny develop into IJs, sequester *P. luminescens* and  
77 seek out new insect hosts.

78 Axenic *H. bacteriophora* IJs are unable to develop past the L1 stage [9] , and *H.*  
79 *bacteriophora* may depend on *P. luminescens* for secondary metabolite provision [10,  
80 11]. Mutation of the global post-transcriptional regulator Hfq in *P. luminescens* reduced  
81 the bacterium's secondary metabolite production and led to failed nematode  
82 development, despite the bacterium maintaining virulence against host (*Galleria*  
83 *mellonella*) larvae [12]. Together these symbionts are efficient killers of pest (and  
84 other) insects, and understanding of the molecular mechanisms of host killing could  
85 lead to new insecticides.

86 *H. bacteriophora* was selected by the National Human Genome Research Initiative as  
87 a sequencing target [13]. Genomic DNA from axenic cultures of the inbred strain *H.*  
88 *bacteriophora* TTO1 was sequenced using Roche 454 technology and a high quality  
89 77 Mb draft genome assembly produced [14]. This assembly was predicted (using  
90 JIGSAW [15] ) to encode 21250 proteins. Almost half of these putative proteins had  
91 no significant similarity to entries in the GenBank non-redundant protein database,  
92 suggesting an explosion of novelty in this nematode. The predicted *H. bacteriophora*  
93 proteome had fewer orthologues of Kyoto Encyclopedia of Genes and Genomes loci  
94 in the majority of metabolic categories than nine other nematodes. *H. bacteriophora*  
95 was also predicted to have a relative paucity of secreted proteins compared to free-  
96 living nematodes, postulated to reflect a reliance on *P. luminescens* for secreted  
97 effectors [14]. The 5.7 Mb genome of *P. luminescens* has also been sequenced [16].  
98 The *H. bacteriophora* proteome had fewer shared orthologues when clustered and

1  
2  
3 100 compared to other rhabditine (Clade V) nematodes (including *Caenorhabditis elegans*  
4  
5  
6 101 and the many animal parasites of the Strongylomorpha) [17].  
7

8 102 In preliminary analyses we noted that while the genome sequence itself had high  
9  
10 103 completeness scores when assessed with the Core Eukaryote Gene Mapping  
11  
12 104 Approach (CEGMA) [18] (99.6% complete) and Benchmarking Universal Single-Copy  
13  
14 105 Orthologs (BUSCO) [19] (80.9% complete and 5.6% fragmented hits for the BUSCO  
15  
16 106 Eukaryota gene set), the predicted proteome scored poorly (47.8% complete and  
17  
18 107 34.7% fragmented by BUSCO; see Table 2). Another unusual feature of the *H.*  
19  
20 108 *bacteriophora* gene set was the proportion of non-canonical splice sites (i.e. those with  
21  
22 109 a 5' GC splice donor site, as opposed to the normal 5' GT). Most nematode (and other  
23  
24 110 metazoan) genomes have low proportions of non-canonical introns (less than 1%)  
25  
26 111 [20], but the published gene models had over 9% non-canonical introns. This is more  
27  
28 112 than double the proportion predicted for *Globodera rostochiensis*, a plant parasitic  
29  
30 113 nematode where the unusually high proportion of non-canonical introns was validated  
31  
32  
33  
34  
35  
36  
37  
38  
39  
40  
41  
42  
43  
44  
45  
46  
47  
48  
49  
50  
51  
52  
53  
54  
55  
56  
57  
58  
59  
60  
61  
62  
63  
64  
65

62 114 If these unusual characteristics reflect a truly divergent proteome, the novel proteins  
63  
64 115 in *H. bacteriophora* may be crucial in its particular symbiotic and parasitic  
65  
66 116 relationships, and of great interest to development of improved strains for horticulture.  
67  
68 117 However, it is also possible that contamination of the published assembly or  
69  
70 118 annotation artefacts underpin these unusual features. We re-examined the *H.*  
71  
72 119 *bacteriophora* genome and gene predictions, and used more recent tools to re-predict  
73  
74 120 protein coding genes from the validated assembly. As the BRAKER1 predictions were  
75  
76 121 demonstrably better than the original ones, we explored whether some of the unusual  
77  
78 122 characteristics of the published protein set, in particular the level of novelty and the  
79  
80 123 proportion of secreted proteins, were supported by the BRAKER1 protein set.

124

1  
2  
3  
4  
5  
6  
7  
8  
9  
10  
11  
12  
13  
14  
15  
16  
17  
18  
19  
20  
21  
22  
23  
24  
25  
26  
27  
28  
29  
30  
31  
32  
33  
34  
35  
36  
37  
38  
39  
40  
41  
42  
43  
44  
45  
46  
47  
48  
49  
50  
51  
52  
53  
54  
55  
56  
57  
58  
59  
60  
61  
62  
63  
64  
65

## 125 Findings

### 126 No evidence for substantial contamination of the *H. bacteriophora* genome assembly

127 We used BlobTools [21] to assess the published genome sequence [14] for potential  
128 contamination. The raw read data from the published assembly was not available on  
129 the trace archive or short read archive (SRA). We thus utilised new Illumina short-read  
130 re-sequencing data generated from strain G2a1223, an inbred derivative of *H.*  
131 *bacteriophora* strain "Gebre", isolated by Adler Dillman in Moldova. G2a1223 has  
132 about 1 single-nucleotide change per ~2000 nucleotides compared to the originally-  
133 sequenced TT01 strain. G2a1223 was grown in culture on the non-colonising  
134 bacterium *Photorhabdus temperata*. The majority of these data (96.3% of the reads)  
135 mapped as pairs to the assembly, suggesting completeness of the published assembly  
136 with respect to the new raw read data. In addition, 99.96% of the published assembly  
137 had at least 10-fold coverage from the new raw reads.

138 The assembly was explored using a taxon-annotated GC-coverage plot, with coverage  
139 taken from the new Illumina data and sequence similarity from the NCBI nucleotide  
140 (nt) database (Figure 1). *H. bacteriophora* was excluded from the database search  
141 used to annotate the scaffolds to exclude self hits from the published assembly. All  
142 large scaffolds clustered congruently with respect to read coverage and CG content.  
143 A few (57) scaffolds had best BLASTn matches to phyla other than Nematoda (Table  
144 1). A small amount (5 kb) of likely remaining *P. luminescens* contamination was noted.  
145 We identified 100 kb of the genome of a strain of the common culture contaminant  
146 bacterium *Stenotrophomonas maltophilia* [22]. Contamination of the assembly with *S.*  
147 *maltophilia* was acknowledged [14] but removal of scaffolds before annotation was not

148 discussed. Two high-coverage scaffolds that derived from the *H. bacteriophora*  
149 mitochondrial genome were annotated as “undefined Eukaryota” because of  
150 taxonomic misclassification in the NCBI nt database. Many scaffolds with coverages  
151 close to that of the expected nuclear genome had best matches to two unexpected  
152 sources: the platyhelminths *Echinostoma caproni* and *Dicrocoelium dendriticum*, and  
153 several hymenopteran arthropods. Inspection of these matches showed that they were  
154 due to high sequence similarity to a family of *H. bacteriophora* mariner-like  
155 transposons [23] and thus these were classified as *bona fide* nematode nuclear  
156 sequences. A group of scaffolds contained what appears to be a *H. bacteriophora*  
157 nuclear repeat with highest similarity to histone H3.3 sequences from Diptera and  
158 Hymenoptera. The remaining scaffolds had low-scoring nucleotide matches to a  
159 variety of chordate, chytrid and arthropod sequences from deeply conserved genes  
160 (tubulin, kinases), but had coverages similar to other nuclear sequences.

161 Scaffolds with average coverage of less than 10-fold were removed from the assembly  
162 (35 scaffolds spanning 132949 bases, 0.2% of the total span; see Supporting Data  
163 [24]: *Low\_coverage\_scaffolds.txt*). This removed all scaffolds aligning to *S. maltophilia*  
164 and to *Photorhabdus* spp. (104 kb). The origins of the additional 28 kb were not  
165 investigated. In the published annotation [14], 76 genes were predicted from these  
166 scaffolds.

## 167 **Improved gene predictions are biologically credible and have unexceptional novelty**

168 New gene predictions were generated from a soft-masked version of the filtered  
169 assembly using the RNA-seq based annotation pipeline BRAKER1 v1.9 [25],  
170 generating 16070 protein predictions from 15747 protein coding genes (see  
171



172 Supporting Data [24]: *BRAKER1.soft.masked.output.files.zip*). We compared the soft-  
173 masked predictions to those from the published analysis [14] (Figure 2, Table 2). The  
174 predicted proteins from the new BRAKER1/soft-masked gene set were, on average,  
175 longer (Figure 2A). While the average number of introns per gene was the same in the  
176 BRAKER1/soft-masked and published predictions, the BRAKER1/soft-masked gene  
177 set had more single-exon genes (Figure 2B). Hard masking of the genome and re-  
178 prediction resulted in fewer single exon genes, suggesting that many of these putative  
179 genes could be derived from repetitive sequence (Supporting Data [24]:  
180 *BRAKER1.hard.masked.output.files.zip* and *BRAKER1\_annotation\_comparisons.txt*),  
181 but only 316 of the single exon genes from the BRAKER1/soft-masked assembly had  
182 similarity to transposases or transposons. The BRAKER1/soft-masked annotations  
183 were taken forward for further analysis.

184 Four-fifths (83.3%) of the published protein-coding gene predictions [14] overlapped  
185 to some extent with the BRAKER1/soft-masked predictions at the genome level, with  
186 a mean of 67% of the nucleotides of each BRAKER1/soft-masked gene covered by a  
187 published gene (Figure 2C). Half (8061) of the 15747 BRAKER1/soft-masked gene  
188 predictions had an overlap proportion of  $\geq 0.9$  with the published predictions. At the  
189 level of protein sequence only 836 proteins were identical between the two predictions,  
190 and only 2099 genes had identical genome start and stop positions.

191 The BRAKER1/soft-masked and published gene sets were checked for completeness  
192 using BUSCO [19], based on the Eukaryota lineage gene set, and *Caenorhabditis* as  
193 the species parameter for orthologue finding. The BRAKER1/soft-masked gene set  
194 contained a substantially higher percentage of complete, and lower percentage of  
195 fragmented BUSCO genes than the published set (Table 2). Two *H. bacteriophora*

196 transcriptome datasets, publicly available Roche 454 data and Sanger expressed  
1  
2 197 sequence tags, were mapped to the published and BRAKER1/soft-masked  
3  
4  
5 198 transcriptomes to assess gene set completeness. This suggested that the  
6  
7 199 BRAKER1/soft-masked transcriptome predictions were more complete than the  
8  
9  
10 200 original (Table 2).

11  
12  
13 201 Nearly half (9893/20964; 47.2%) of the published proteins were reported to have no  
14  
15 202 significant matches in the NCBI non-redundant protein database (nr) [14]. This  
16  
17  
18 203 surprising result could be due to a paucity of data from species closely related to *H.*  
19  
20 204 *bacteriophora* in the NCBI nr database at the time of the search, or inclusion of poor  
21  
22  
23 205 protein predictions in the published set, or both. Targeted investigation of these 9893  
24  
25 206 orphan proteins here was not possible due to inconsistencies in gene naming in the  
26  
27  
28 207 publically available files. The published and BRAKER1/soft-masked proteomes were  
29  
30 208 compared to the Uniref90 database [26], using DIAMOND v0.9.5 [27] with an  
31  
32 209 expectation value cut-off of  $1e^{-5}$ . In the published proteome, 8962 proteins (42.7%)  
33  
34  
35 210 had no significant matches in Uniref90. Thus a relatively poorly populated database  
36  
37 211 was not the main driver for the high number of orphan proteins reported in the  
38  
39  
40 212 published proteome. In the BRAKER1/soft-masked proteome, only 2889 proteins  
41  
42 213 (18.3%) had no hits in the Uniref90 database (Table 2).

43  
44  
45 214 OrthoFinder v1.1.4 [28] was used to define orthologous groups in the proteomes of 23  
46  
47  
48 215 rhabditine (Clade V) nematodes (Supporting Data [24]: *Orthofinder\_analysis*) and just  
49  
50 216 the published *H. bacteriophora* protein-coding gene predictions, or just the  
51  
52  
53 217 BRAKER/soft-masked proteome, or both. All proteins <30 amino-acids long were  
54  
55 218 excluded from clustering (see Supporting: *Orthofinder\_analysis*). We identified 5442  
56  
57  
58 219 singletons (26.8% of the proteome) when the analysis included only the published *H.*  
59  
60 220 *bacteriophora* protein set. An additional 248 proteins formed *H. bacteriophora*-specific

221 orthogroups. Orthology analysis including only the BRAKER/soft-masked protein set  
1  
2 222 predicted 1112 *H. bacteriophora* singletons (7.1% of the proteome) with 167 proteins  
3  
4 223 in *H. bacteriophora*-specific orthogroups (Figure 2D). In comparison, when the  
5  
6  
7 224 orthology analysis included the BRAKER1/soft-masked predictions there were 1858  
8  
9 225 *C. elegans* singletons (9.2% of the *C. elegans* proteome). Very few universal, single  
10  
11  
12 226 copy orthologues were defined in either analysis. Exploring “fuzzy-1-to-1” orthogroups  
13  
14 227 (where true 1-to-1 orthology was found for greater than 75% of the 24 species - i.e. 18  
15  
16  
17 228 or more species), the published protein predictions had more missing fuzzy-1-to-1  
18  
19 229 orthologues than did the BRAKER1/soft-masked predictions (Table 2). In the  
20  
21  
22 230 clustering that included both proteomes, 2019 clusters contained more proteins from  
23  
24 231 the BRAKER1/soft-masked than the published proteome, whereas 2714 contained a  
25  
26  
27 232 larger number contributed from the published than the BRAKER1/soft-masked  
28  
29 233 proteome (Supporting Data [24]: *kinfin.zip*).

30  
31  
32 234 The published *H. bacteriophora* gene set had additional peculiarities. The published  
33  
34  
35 235 set of gene models included 102274 introns, 9069 of which (8.9%) had non-canonical  
36  
37 236 splice sites (i.e. 5' GC – AG 3'). Some of the genes in the published gene set had up  
38  
39  
40 237 to nine noncanonical introns (Figure 2E). In the BRAKER1/soft-masked gene set there  
41  
42 238 were 109767 introns, 868 (0.8%) of which had non-canonical splice sites. This  
43  
44  
45 239 proportion is in keeping with that found in most other rhabditine nematodes. For  
46  
47 240 example, the extensively manually annotated *C. elegans* has 2429 (0.6%) non-  
48  
49  
50 241 canonical (5' GC – AG 3') introns. In *C. elegans* non-canonical introns are frequently  
51  
52 242 found only in alternately spliced, and shorter isoforms, and over 93-99% were in genes  
53  
54 243 that had homologues in other species, depending on the species used in the protein  
55  
56  
57 244 orthology clustering. However, in the published *H. bacteriophora* gene set, 34-49% of  
58  
59 245 the genes with GC – AG introns were in *H. bacteriophora*-unique proteins.

246 A supermatrix maximum likelihood phylogeny was generated from the fuzzy-1-1  
1  
2 247 orthologues in the clustering that included both *H. bacteriophora* proteomes (Figure 3;  
3  
4  
5 248 see Supporting Data [24]: *Phylogenetic\_analyses*). The phylogeny, rooted with  
6  
7 249 *Pristionchus* spp., shows the *H. bacteriophora* proteomes as sisters. However the  
8  
9  
10 250 BRAKER1/soft-masked proteome has a shorter branch length to *Heterorhabditis*' most  
11  
12 251 recent common ancestor with other Clade V nematodes, suggesting that the published  
13  
14  
15 252 proteome includes uniquely divergent sequences.  
16  
17  
18 253 The secretome of *H. bacteriophora* has been of particular interest as it may contain  
19  
20 254 proteins involved in symbiotic interactions with *P. luminescens*, and proteins crucial to  
21  
22  
23 255 invasion and survival within the insect haemocoel. In the original publication, only 603  
24  
25 256 proteins (2.8% of the proteome) were predicted to be secreted [14]. This proportion is  
26  
27  
28 257 much lower than in free living nematodes such as *C. elegans* and it was postulated  
29  
30 258 that *H. bacteriophora* relies on *P. luminescens* for secreted effectors [14]. The signal  
31  
32  
33 259 peptide detection method used in the original analyses was not described [14]. We  
34  
35 260 used SignalP version 4.1 within Interproscan to annotate proteins in both the  
36  
37 261 BRAKER1 and published *H. bacteriophora* proteomes. Proteins having a predicted  
38  
39  
40 262 signal peptide but no transmembrane domain were classified as secreted. We  
41  
42 263 identified 1023 (6.5%) putative secreted proteins in the BRAKER1/soft-masked  
43  
44  
45 264 proteome and 1067 (5.1%) in the published proteome. By the same method other  
46  
47 265 rhabditine (Clade V) nematodes that do not have known symbiotic associations with  
48  
49  
50 266 bacteria, such as *Teladorsagia circumcincta*, had comparable secretome sizes to *H.*  
51  
52 267 *bacteriophora* (Supporting Data [24]: *Secretome\_analysis.txt*). This suggests that *H.*  
53  
54 268 *bacteriophora* does not have a reduced secretome compared to other, related  
55  
56  
57 269 nematodes that do not have symbiont partners.  
58  
59  
60  
61  
62  
63  
64  
65

270 Interproscan was also used to annotate the BRAKER1 and published proteomes by  
271 identifying matches against the databases TIGRFAM v15.0, ProDom v2006.1,  
272 SMART-7.1, PrositePatterns v20.119, PRINTS v42.0, SuperFamily v1.75, Pfam  
273 v29.0, and PrositeProfiles v20.119. The BRAKER1 proteome had a greater number of  
274 proteins annotated with at least one domain compared to the published proteome, and  
275 a greater number of total domains identified (Supporting Data [24]:  
276 *IPR.domain.analysis.txt*).

## 277 Discussion

278 Assembly of, and genefinding in, new genomes is a challenging task, and especially  
279 so in larger genomes and those phylogenetically distant from any previously analysed  
280 exemplar. When applied *de novo* to datasets from extremely well-assembled and well-  
281 annotated model species, even the best methods fail to recover fully contiguous  
282 assemblies and yield predicted gene sets that have poor correspondence with the  
283 known truth [29]. A major issue with primary assemblies and gene sets arises when  
284 exceptional findings are taken at face value, and used to assert exceptional biology in  
285 a target species [30]. Where these exceptions are in fact the result of methodological  
286 failings, the scientific record, including the public databases, becomes contaminated.  
287 At best, erroneous assertions can be quickly checked and corrected, but at worst they  
288 can mislead and inhibit subsequent work.

289 A second concern arises from the recognition that while no method can currently  
290 produce perfect assemblies and perfect gene sets from raw data, analyses using the  
291 same toolsets will resemble each other and reflect the successes and failings of the  
292 particulars of the algorithms employed. However, when comparing genome  
293 assemblies and gene sets produced by different pipelines, it may be that the disparity

294 in output generated by different pipelines dominates any signal from biology. Genomes  
1  
2 295 assembled and annotated with the same tools will look more similar, and in a pool of  
3  
4  
5 296 assemblies and protein sets the one species that used a variant process will be flagged  
6  
7 297 as exceptional. Again, the model organisms show the way: as new data and new  
8  
9  
10 298 scrutiny is added to the genome, better and better analyses are available. With  
11  
12 299 additional analysis, and additional independent data, genome and gene predictions  
13  
14  
15 300 can be improved markedly for any species [31].  
16

17  
18 301 Here we examined the “outlier” whole-genome protein predictions from the  
19  
20 302 entomopathogenic nematode *H. bacteriophora* [14]. The original publication noted that  
21  
22  
23 303 the number of novel proteins (those restricted to *H. bacteriophora*) was particularly  
24  
25 304 large, while the number of secreted proteins was rather small, and suggested that  
26  
27  
28 305 these genome features might be a result of evolution to the species’ novel lifestyle  
29  
30 306 (which includes an essential symbiosis with the bacterium *P. luminescens*). Overall  
31  
32  
33 307 we found that while the published genome sequence had a small amount of bacterial  
34  
35 308 contamination, and a small number of “nematode” genes were predicted from these  
36  
37  
38 309 contaminants, the assembly itself was of high quality. Our re-prediction of the gene  
39  
40 310 set of *H. bacteriophora* however suggested that the excess of unique genes, the lack  
41  
42 311 of secreted proteins and several other surprising features of the original gene set were  
43  
44  
45 312 likely to be artefacts of the gene prediction pipeline chosen. While our gene set was  
46  
47 313 by no means perfect (for example we identified an excess of single exon genes that  
48  
49  
50 314 derive from likely repetitive sequence) it had better biological completeness and  
51  
52 315 credibility.  
53

54  
55 316 We used the RNA-seq based annotation pipeline BRAKER1 [25], not available to the  
56  
57  
58 317 authors of the original genome publication, who used JIGSAW [15] (see  
59  
60 318 Supplementary File 1). While JIGSAW achieved high sensitivity and specificity at the  
61

1  
2  
3  
4  
5  
6  
7  
8  
9  
10  
11  
12  
13  
14  
15  
16  
17  
18  
19  
20  
21  
22  
23  
24  
25  
26  
27  
28  
29  
30  
31  
32  
33  
34  
35  
36  
37  
38  
39  
40  
41  
42  
43  
44  
45  
46  
47  
48  
49  
50  
51  
52  
53  
54  
55  
56  
57  
58  
59  
60  
61  
62  
63  
64  
65

319 level of nucleotide, exon and gene predictions in the nematode genome annotation  
320 assessment project, nGASP [29], direct comparison of the sensitivity and specificity of  
321 JIGSAW and BRAKER1 has not been published to the best of our knowledge.  
322 BRAKER1 has been shown to give superior prediction results over *ab initio* GeneMark-  
323 ES, or *ab initio* AUGUSTUS alone [25]. In particular, BRAKER1 is able to better use  
324 transcriptome data for gene finding. While we supplied only a partial Roche 454  
325 transcriptome to BRAKER1, the resulting gene set has much improved numerical and  
326 biological scores. In particular we note that the biological completeness of the  
327 predicted gene set now matches that of the genome sequence from which it was  
328 derived (Table 2).

329 The published gene set had an unusually high proportion (8.9%) of non-canonical (5'  
330 GC – AG 3') introns. While most genomes have a low proportion of non-canonical  
331 introns (usually approximately 0.5% of all introns), some species have markedly higher  
332 proportions [20]. The high proportion found initially in *H. bacteriophora* could perhaps  
333 have been taken as a warning that the prediction set was of concern. We note that  
334 gene predictors can be set to disallow any predictions that require non-canonical  
335 splicing, and many published genomes have zero non-canonical introns. These gene  
336 prediction sets are likely to categorically miss true non-canonically spliced genes.

337 The new BRAKER1 gene prediction set had many fewer species-unique genes (7.1%)  
338 than did the original (42.7%) when compared to 23 other related nematodes. We  
339 regard this reduction in novelty as indicative of a better prediction, as, for example, *C.*  
340 *elegans*, the best-annotated nematode genome, had only 9.2% of species unique  
341 genes in our analysis. Having a large proportion of orphan proteins is not unique to  
342 the published *H. bacteriophora* predictions. Nearly half (47%) of the gene predictions  
343 in *Pristionchus pacificus* were reported to have no homologues in fifteen other

1  
2  
3  
4  
5  
6  
7  
8  
9  
10  
11  
12  
13  
14  
15  
16  
17  
18  
19  
20  
21  
22  
23  
24  
25  
26  
27  
28  
29  
30  
31  
32  
33  
34  
35  
36  
37  
38  
39  
40  
41  
42  
43  
44  
45  
46  
47  
48  
49  
50  
51  
52  
53  
54  
55  
56  
57  
58  
59  
60  
61  
62  
63  
64  
65

344 nematode species [32]. Evaluation of proteomic and transcriptomic evidence, as well  
345 as patterns of synonymous and non-synonymous substitution, suggested that as many  
346 as 42-81% of these genes were in fact expressed [33]. Therefore the high proportion  
347 of orphan genes in *H. bacteriophora* is not *prima facie* evidence of poor gene  
348 predictions. Expanded transcriptomic and comparative data are needed to build on the  
349 work we have presented in affirming the true *H. bacteriophora* gene set.

350 Biological pest control agents may become increasingly important for ensuring crop  
351 protection in the future [34]. A number of factors currently limit the commercial  
352 applicability of *H. bacteriophora*, including their short shelf life, susceptibility to  
353 environmental stress and limited insect tropism [13, 35]. Accurate genome annotation  
354 will assist in the analysis of *H. bacteriophora*, facilitating the exploration of genes  
355 involved in its parasitic and symbiotic interactions, and supporting genetic  
356 manipulation to enhance its utility as a biological control agent.

357

358

359

360 **Methods**

361 **Methods Supplementary Note**



362 A detailed description of the command lines used in the generation of the BRAKER1  
1  
2 363 gene predictions and the associated analysis can be found in Supplementary File 2  
3  
4  
5 364 which accompanies this manuscript.  
6  
7

### 8 365 **Contaminant screening and Removal of Low Coverage Scaffolds**

9

10  
11 366 The assembly scaffolds were aligned to the NCBI nt database, release 204, using  
12  
13  
14 367 Nucleotide-Nucleotide BLAST v2.6.0+ (available at:[36] ) in megablast mode, with an  
15  
16 368 e-value cut off of  $1e^{-25}$  and a culling limit of 2 [37]. *H. bacteriophora* hits were excluded  
17  
18  
19 369 from the search using a list of all *H. bacteriophora* associated gene identifiers  
20  
21 370 downloaded from NCBI GenBank nucleotide database, release 219. Raw, paired-end  
22  
23  
24 371 Illumina reads from the re-sequencing project were mapped against the assembly, as  
25  
26 372 paired, using Burrows-Wheeler Aligner (BWA) v0.7.15 (available at:[38] ) in mem  
27  
28  
29 373 mode with default options [39]. The output was converted to a BAM file using Samtools  
30  
31 374 v1.3.1 (SAMTOOLS, RRID:SCR\_002105) [40] and overall mapping statistics  
32  
33  
34 375 generated in flagstat mode.  
35

36  
37 376 Blobtools v0.9.19 [21] was used to create taxon annotated GC-coverage plots for the  
38  
39 377 published assembly, using the Nucleotide-Nucleotide BLAST and raw read mapping  
40  
41  
42 378 results. Scaffolds that did not have Nematoda as a top BLAST hit at the phylum level  
43  
44 379 were identified, and the species-level top BLAST hit, length of scaffold, and scaffold  
45  
46 380 mean base coverage were extracted from the Blobology output. Scaffolds with a mean  
47  
48  
49 381 base coverage of <10x were identified from the output of the Blobology pipeline and  
50  
51 382 removed from the assembly. A list of excluded scaffolds is available in Supporting  
52  
53  
54 383 Data [24]: *Low\_coverage\_scaffolds.txt*.

## 384 **Generation of BRAKER1 Gene Predictions**

1  
2  
3 385 Before annotation the published assembly was soft-masked for known Nematoda  
4  
5  
6 386 repeats from the RepeatMasker Library v4.0.6 using RepeatMasker v4.0.6  
7  
8 387 (RepeatMasker, RRID:SCR\_012954) [41] with default options. The two publicly  
9  
10  
11 388 available Roche 454 RNA-seq data files were adaptor and quality-trimmed using  
12  
13 389 BBDuk v36.92 (unpublished toolkit from Joint Genome Institute, n.d.). Reads below  
14  
15  
16 390 an average quality of 10 or shorter than 25 nucleotides were discarded. Regions with  
17  
18 391 average quality below 20 were trimmed. The cleaned reads were mapped to the soft-  
19  
20  
21 392 masked assembly using STAR v2.5 (STAR, RRID:SCR\_015899) with default options  
22  
23 393 [42, 43]. The soft-masked assembly was annotated with BRAKER1 v1.9 [25] with  
24  
25 394 guidance from the mapping output from STAR. An identical annotation method was  
26  
27  
28 395 applied to a hard-masked version of the assembly. The assembly was hard-masked  
29  
30 396 for known Nematoda repeats from the RepeatMasker Library v4.0.6 using  
31  
32  
33 397 RepeatMasker v4.0.6 with default options. The published and BRAKER1 proteomes  
34  
35 398 were compared using DIAMOND v0.9.5 [27] in BLASTP mode to the Uniref90  
36  
37  
38 399 database (release 03/2017) [26] with an expectation value cut-off of  $1e^{-5}$  and no limit  
39  
40 400 on the number of target sequences. Hits to *H. bacteriophora* proteins were removed  
41  
42 401 using its TaxonID.

## 46 402 **Gene Prediction Statistics**

47  
48  
49 403 Gene-level statistical summaries were calculated including only the longest isoforms  
50  
51  
52 404 of the BRAKER1 gene predictions. The longest isoform for each gene in the BRAKER1  
53  
54 405 *H. bacteriophora* annotation was identified from the general feature format (GFF) file,  
55  
56  
57 406 and then selected from the protein FASTA files. The GFF file for the published gene  
58  
59 407 predictions did not contain any isoforms and was analysed in its entirety. f Introns were  
60  
61

408 inferred for the published GFF file using GenomeTools v1.5.9 in -addintrons mode  
1  
2 409 [44]. Intron frequencies were then calculated for the published and BRAKER1  
3  
4  
5 410 annotations from their respective GFF files. Exon frequencies were calculated for the  
6  
7 411 published annotations directly from the GFF file. For the BRAKER1 annotations, exon  
8  
9  
10 412 frequency per gene was assumed to be equivalent to coding DNA sequence (CDS)  
11  
12 413 frequency and inferred from the GFF file, as exon features were not included in the  
13  
14 414 GFF file. Intron frequency histograms and bar plots were generated in Rstudio  
15  
16 415 v1.0.136 (RStudio, RRID:SCR\_000432) with R v3.3.2 (R Project for Statistical  
17  
18 416 Computing, RRID:SCR\_001905) and in some instances the package ggplot2 v2.2.1.  
19  
20  
21 417 As intron frequency lists did not contain single exon genes (those with no introns),  
22  
23 418 these were added manually to the intron frequency lists in Microsoft Excel before  
24  
25 419 importing the data into Rstudio.  
26  
27  
28  
29  
30 420 The proportion of introns with GC – AG splice junctions was assessed for the gene  
31  
32 421 models of *C. elegans* (WS258), and the published and BRAKER1/soft-masked gene  
33  
34 422 models of *H. bacteriophora*. Intronic features were added to general feature format  
35  
36 423 version 3 (GFF3) files using GenomeTools v1.5.9 [44] ('gt gff3 -sort -tidy -retainids –  
37  
38 424 fixregionboundaries -addintrons') and splice sites were extracted using the script  
39  
40 425 extractRegionFromCoordinates.py [20]. Results were visualised using the script  
41  
42 426 plot\_GCAG\_counts.R (available at: [45]).  
43  
44  
45  
46  
47  
48 427 Gene features, extracted from the GFF files, were assessed for overlap using bedtools  
49  
50 428 v2.26 (BEDTools, RRID:SCR\_006646) in intersect mode [46]. Only genes on the  
51  
52 429 same strand were considered to be overlapping. To calculate the number of identical  
53  
54 430 proteins shared between the published and BRAKER1 proteomes non-redundant  
55  
56 431 protein fasta files were generated using cd-hit v4.6.1 (CD-HIT, RRID:SCR\_007105)  
57  
58  
59  
60  
61  
62  
63  
64  
65

432 [47] for the BRAKER1 and published predictions. The files were concatenated, sorted  
1  
2 433 and unique sequences counted using unix command line tools.  
3  
4  
5 434 BUSCO v2.0.1 (BUSCO, RRID:SCR\_015008) [19], with Eukaryota as the lineage  
6  
7  
8 435 dataset, and *Caenorhabditis* as the species parameter for orthologue finding was  
9  
10 436 applied to both proteomes and the published assembly to calculate BUSCO scores.  
11  
12 437 CEGMA (CEGMA, RRID:SCR\_015055) [18] was run on the published genome  
13  
14  
15 438 sequence. BWA was used with default settings to map the RNA-seq datasets (the  
16  
17  
18 439 Sanger ESTs in assembled form) to the CDS transcripts from the published and  
19  
20 440 BRAKER1 annotations and the summary statistics obtained with Samtools v1.3.1 in  
21  
22 441 flagstat mode.  
23  
24  
25

#### 26 442 **Protein orthology analyses**

  
27  
28

29 443 OrthoFinder v1.1.4 [28] with default settings was used to identify orthologous groups  
30  
31 444 in the proteomes of 23 Clade V nematodes with the addition of either the  
32  
33  
34 445 BRAKER1/soft-masked and published *H. bacteriophora* proteomes separately or  
35  
36  
37 446 simultaneously. The proteomes for the 23 Clade V nematodes were downloaded from  
38  
39 447 WBPS8 (available at:[48]) or GenomeHubs.org (available at: [49]), and detailed source  
40  
41  
42 448 information is available in Supporting Data [24]: *Secretome.analysis.txt*. All proteomes  
43  
44 449 were filtered to contain only the longest isoform of each gene, and for all proteomes  
45  
46 450 (except the BRAKER1/soft-masked *H. bacteriophora* protein set), proteins less than  
47  
48  
49 451 30 amino-acids in length were excluded before clustering. For the *H. bacteriophora*  
50  
51 452 BRAKER1/soft-masked protein set, proteins less than 30 amino-acids (SF5.2) were  
52  
53  
54 453 removed manually from the orthofinder clustering statistics after clustering. None of  
55  
56 454 these proteins seeded new clusters and are therefore will not have influenced the  
57  
58  
59 455 clustering results. Kinfim v0.9 [50], was used with default settings to identify true and  
60  
61

1  
2  
3  
4  
5  
6  
7  
8  
9  
10  
11  
12  
13  
14  
15  
16  
17  
18  
19  
20  
21  
22  
23  
24  
25  
26  
27  
28  
29  
30  
31  
32  
33  
34  
35  
36  
37  
38  
39  
40  
41  
42  
43  
44  
45  
46  
47  
48  
49  
50  
51  
52  
53  
54  
55  
56  
57  
58  
59  
60  
61  
62  
63  
64  
65

456 fuzzy 1-to-1 orthologues, and their associated species specific statistics. Fuzzy 1-to-1  
457 orthologues are true 1-to-1 orthologues for greater than 75% of the species clustered.  
458 For the clustering analysis presented in Supporting Data [24]: *Orthofinder\_analysis*,  
459 the BRAKER1/soft-masked and published proteomes were clustered simultaneously  
460 to the 23 other Clade V nematode proteomes, and singletons, and species-specific  
461 clusters were excluded.

### 462 **Interproscan and search for transposons**

463 Interproscan v5.19-58.0 (RRID:SCR\_005829) [51] was used in protein mode to  
464 identify matches in the BRAKER1 and published proteomes in the following  
465 databases: TIGRFAM v15.0, ProDom v2006.1, SMART-7.1, SignalP-EUK v4.1,  
466 PrositePatterns v20.119, PRINTS v42.0, SuperFamily v1.75, Pfam v29.0, and  
467 PrositeProfiles v20.119. For secretome analysis of the 23 Clade V nematodes  
468 Interproscan v5.19-58.0 was run against the SignalP-EUK v4.1 database alone.  
469 InterProScan was run with the option for all match calculations to be run locally and  
470 with gene ontology annotation activated. The number of single exon genes with  
471 similarity to transposons or transposases in the BRAKER1/soft-masked predictions  
472 was calculated by searching the full InterProScan results for the strings 'Transposon',  
473 'transposon', 'Transposase', or 'transposase' and the number of single exon gene  
474 InterProScan results containing these terms counted. InterProScan results from  
475 searching the SignalP-EUK-4.1 database were queried to identify putative secreted  
476 proteins. Those with a predicted signal peptide but no transmembrane region were  
477 considered to be secreted.

## 478 Phylogenetic Analyses

1  
2  
3 479 Both *H. bacteriophora* proteomes were clustered simultaneously with the 23 Clade V  
4  
5  
6 480 nematode proteomes into orthologous groups using Orthofinder v1.0 [28]. The fuzzy  
7  
8 481 1-to-1 orthologues were extracted and processed using GNU parallel [52]. They were  
9  
10 482 aligned using MAFFT v7.267 (RRID:SCR\_011811) [53], and the alignments trimmed  
11  
12  
13 483 with NOISY v1.5.12 [54]. A maximum likelihood gene tree was generated for each  
14  
15 484 orthologue using RaXML v8.1.20 (RRID:SCR\_006086) with a PROTGAMMAGTR  
16  
17  
18 485 amino-acid substitution model [55]. Rapid Bootstrap analysis and search for the best  
19  
20 486 -scoring ML tree within one program run with 100 rapid bootstrap replicates was used.  
21  
22  
23 487 The trees were pruned using PhyloTreePruner v1.0 [56] to remove paralogues, with  
24  
25 488 0.5 as the bootstrap cutoff and a minimum of 20 species in the orthogroup after pruning  
26  
27  
28 489 for inclusion in the supermatrix. Where species had more than one putative orthologue  
29  
30 490 in an orthogroup the longest was selected. The remaining 897 orthogroups were re-  
31  
32  
33 491 aligned using MAFFT v7.267, trimmed with NOISY v1.5.12 and concatenated into a  
34  
35 492 supermatrix using FASconCAT v.1.0 [57]. A supermatrix maximum-likelihood tree was  
36  
37  
38 493 generated using RAxML with the rapid hill climbing algorithm (default), with a  
39  
40 494 PROTGAMMAGTR amino-acid substitution model and 100 bootstrap replicates .  
41  
42 495 *Pristionchus* spp. were designated as the outgroup. The tree was visualised in  
43  
44  
45 496 Dendroscope v3.5.9 [58].

## 497 Input data and data availability

49  
50  
51  
52 498 The *H. bacteriophora* genome and annotations [14] were downloaded from Wormbase  
53  
54 499 *Parasite (WBPS8) (see Supporting Data [24]:*  
55  
56 500 *Publicly\_available\_assembly\_details.txt)*. The ESTs [59, 60] were obtained from NCBI  
57  
58  
59 501 dbEST [61] (accessions listed in Supporting Data [24]: *EST.acc.txt*), and the  
60  
61

502 assembled versions used in the analysis are available in Supporting Data [24]:  
1  
2 503 *EST.assembled.fas*. Roche 454 transcriptome data [14] were obtained from the Short  
3  
4  
5 504 Read Archive (Accession numbers: SRX001441 and SRX001440). *H. bacteriophora*  
6  
7 505 strain Gebre, a gift from Adler Dillman, was inbred by selfing single hermaphrodites  
8  
9  
10 506 for five generations to generate the strain G2a1223. New Illumina HiSeq2000, paired  
11  
12 507 end, 75 base data were generated from *H. bacteriophora* G2a1223 genomic DNA by  
13  
14  
15 508 the Millard and Muriel Jacobs Genetics and Genomics Laboratory at Caltech (Short  
16  
17 509 Read Archive accession number: SRP135845).

18  
19  
20 510 The revised gene annotations for *H. bacteriophora* have been submitted to Zenodo  
21  
22  
23 511 [62]. The supporting data for this manuscript is additionally available via the  
24  
25 512 GigaScience repository, GigaDB [24].

26  
27 513

### 30 514 **Competing interests**

31  
32  
33 515 The authors declare that they have no competing interests  
34  
35

### 36 516 **Funding**

37  
38  
39 517 This project was supported by FMs Wellcome Trust-funded graduate programme  
40  
41 518 [204052/Z/16/Z].  
42  
43

### 44 519 **Author's contributions**

45  
46  
47 520 Conceptualization, MB; Methodology, FM, DB, and MB; Formal analysis, FM, DRL and  
48  
49 521 MB; Supervision, MB; Writing- original draft, FM and DRL; Writing- review and editing,  
50  
51  
52 522 FM, MB, DRL, DB, HTS; Resources, HTS.  
53  
54

### 55 523 **Acknowledgements**

56  
57  
58 524 Sujai Kumar, Lewis Stevens, Carlos Caurcel and Elisabeth Sjokvist offered expert  
59  
60 525 technical support and advice. Igor Antoshechkin of the Millard and Muriel Jacobs  
61

526 Genetics and Genomics Laboratory at Caltech assisted with Illumina sequencing.

527 Adler Dillman provided the parental strain for the inbred *H. bacteriophora* strain

528 G2a1223.

529

530

## 531 **References**

532

533 1. *C. elegans* Sequencing Consortium. Genome sequence of the nematode *C.*

534 *elegans*: a platform for investigating biology. *Science* (80- ). 1998;282:2012–8.

535 2. WormBase, version WS260. <http://www.wormbase.org/>.

536 3. Howe KL, Bolt BJ, Cain S, Chan J, Chen WJ, Davis P, et al. WormBase 2016:

537 expanding to enable helminth genomic research. *Nucleic Acids Res.* 2016;44:D774-

538 80. doi:10.1093/nar/gkv1217.

539 4. Gil GH, Choo HY, Gaugler R. Enhancement of entomopathogenic nematode

540 production in in-vitro liquid culture of *Heterorhabditis bacteriophora* by fed-batch

541 culture with glucose supplementation. *Appl Microbiol Biotechnol.* 2002;58:751–5.

542 doi:10.1007/s00253-002-0956-1.

543 5. Memari Z, Karimi J, Kamali S, Goldansaz SH, Hosseini M. Are Entomopathogenic

544 Nematodes Effective Biological Control Agents Against the Carob Moth, *Ectomyelois*

545 *ceratoniae*? *J Nematol.* 2016;48:261–7.

546 6. Rezaei N, Karimi J, Hosseini M, Goldani M, Campos-Herrera R. Pathogenicity of

547 Two Species of Entomopathogenic Nematodes Against the Greenhouse Whitefly,

548 *Trialeurodes vaporariorum* (Hemiptera: Aleyrodidae), in Laboratory and Greenhouse



- 549 Experiments. *J Nematol.* 2015;47:60–6.  
1  
2
- 3 550 7. Dillman AR, Guillermin ML, Lee JH, Kim B, Sternberg PW, Hallem EA. Olfaction  
4  
5 551 shapes host-parasite interactions in parasitic nematodes. *Proc Natl Acad Sci USA.*  
6  
7  
8 552 2012;109:E2324-33. doi:10.1073/pnas.1211436109.  
9  
10
- 11 553 8. Anbesse S, Ehlers RU. Attraction of *Heterorhabditis* sp. toward synthetic (E)-beta-  
12  
13  
14 554 caryophyllene, a plant SOS signal emitted by maize on feeding by larvae of *Diabrotica*  
15  
16 555 *virgifera virgifera*. *Commun Agric Appl Biol Sci.* 2010;75:455–8.  
17  
18
- 19 556 9. Han R, Ehlers RU. Pathogenicity, development, and reproduction of *Heterorhabditis*  
20  
21  
22 557 *bacteriophora* and *Steinernema carpocapsae* under axenic in vivo conditions. *J*  
23  
24 558 *Invertebr Pathol.* 2000;75:55–8. doi:10.1006/jjpa.1999.4900.  
25  
26
- 27 559 10. Ciche TA, Bintrim SB, Horswill AR, Ensign JC. A Phosphopantetheinyl transferase  
28  
29  
30 560 homolog is essential for *Photorhabdus luminescens* to support growth and  
31  
32  
33 561 reproduction of the entomopathogenic nematode *Heterorhabditis bacteriophora*. *J*  
34  
35 562 *Bacteriol.* 2001;183:3117–26. doi:10.1128/JB.183.10.3117-3126.2001.  
36  
37
- 38 563 11. Bennett HPJ, Clarke DJ. The *pbgPE* operon in *Photorhabdus luminescens* is  
39  
40  
41 564 required for pathogenicity and symbiosis. *J Bacteriol.* 2005;187:77–84.  
42  
43 565 doi:10.1128/JB.187.1.77-84.2005.  
44  
45
- 46 566 12. Tobias NJ, Heinrich AK, Eresmann H, Wright PR, Neubacher N, Backofen R, et  
47  
48  
49 567 al. *Photorhabdus*-nematode symbiosis is dependent on *hfq*-mediated regulation of  
50  
51 568 secondary metabolites. *Environ Microbiol.* 2017;19:119–29. doi:10.1111/1462-  
52  
53  
54 569 2920.13502.  
55  
56
- 57 570 13. Ciche T. The biology and genome of *Heterorhabditis bacteriophora*. *WormBook.*  
58  
59  
60 571 2007;:1–9. doi:10.1895/wormbook.1.135.1.  
61

- 1  
2  
3  
4  
5  
6  
7  
8  
9  
10  
11  
12  
13  
14  
15  
16  
17  
18  
19  
20  
21  
22  
23  
24  
25  
26  
27  
28  
29  
30  
31  
32  
33  
34  
35  
36  
37  
38  
39  
40  
41  
42  
43  
44  
45  
46  
47  
48  
49  
50  
51  
52  
53  
54  
55  
56  
57  
58  
59  
60  
61  
62  
63  
64  
65
- 572 14. Bai X, Adams BJ, Ciche TA, Clifton S, Gaugler R, Kim K, et al. A lover and a fighter:  
573 the genome sequence of an entomopathogenic nematode *Heterorhabditis*  
574 *bacteriophora*. PLoS One. 2013;8:e69618. doi:10.1371/journal.pone.0069618.
- 575 15. Allen JE, Salzberg SL. JIGSAW: integration of multiple sources of evidence for  
576 gene prediction. Bioinformatics. 2005;21:3596–603.  
577 doi:10.1093/bioinformatics/bti609.
- 578 16. Duchaud E, Rusniok C, Frangeul L, Buchrieser C, Givaudan A, Taourit S, et al.  
579 The genome sequence of the entomopathogenic bacterium *Photorhabdus*  
580 *luminescens*. Nat Biotechnol. 2003;21:1307–13. doi:10.1038/nbt886.
- 581 17. Blaxter M, Koutsovoulos G. The evolution of parasitism in Nematoda. Parasitology.  
582 2015;142 Suppl 1:S26-39. doi:10.1017/S0031182014000791.
- 583 18. Parra G, Bradnam K, Korf I. CEGMA: a pipeline to accurately annotate core genes  
584 in eukaryotic genomes. Bioinformatics. 2007;23:1061–7.  
585 doi:10.1093/bioinformatics/btm071.
- 586 19. Simão FA, Waterhouse RM, Ioannidis P, Kriventseva EV, Zdobnov EM. BUSCO:  
587 assessing genome assembly and annotation completeness with single-copy  
588 orthologs. Bioinformatics. 2015;31:3210–2. doi:10.1093/bioinformatics/btv351.
- 589 20. Eves-van den Akker S, Laetsch DR, Thorpe P, Lilley CJ, Danchin EGJ, Da Rocha  
590 M, et al. The genome of the yellow potato cyst nematode, *Globodera rostochiensis*,  
591 reveals insights into the basis of parasitism and virulence. Genome Biol. 2016;17:124.  
592 doi:10.1186/s13059-016-0985-1.
- 593 21. Laetsch DR, Blaxter ML. BlobTools: Interrogation of genome assemblies [version  
594 1; referees: 2 approved with reservations]. F1000Res. 2017;6:1287.

- 595 doi:10.12688/f1000research.12232.1.  
1  
2
- 3 596 22. Fierst JL, Murdock DA, Thanthiriwatte C, Willis JH, Phillips PC. Metagenome-  
4  
5 597 Assembled Draft Genome Sequence of a Novel Microbial *Stenotrophomonas*  
6  
7  
8 598 *maltophilia* Strain Isolated from *Caenorhabditis remanei* Tissue. *Genome Announc.*  
9  
10 599 2017;5. doi:10.1128/genomeA.01646-16.  
11  
12
- 13  
14 600 23. Grenier E, Abadon M, Brunet F, Capy P, Abad P. A mariner-like transposable  
15  
16 601 element in the insect parasite nematode *Heterorhabditis bacteriophora*. *J Mol Evol.*  
17  
18 602 1999;48:328–36.  
19  
20  
21
- 22 603 24. McLean F, Berger D, Laetsch DR, Schwartz HT, Blaxter M. Supporting data for  
23  
24 604 “Improving the annotation of the *Heterorhabditis bacteriophora* genome” *GigaScience*  
25  
26 605 Database 2018. <http://dx.doi.org/10.5524/100404> .  
27  
28  
29
- 30 606 25. Hoff KJ, Lange S, Lomsadze A, Borodovsky M, Stanke M. BRAKER1:  
31  
32 607 Unsupervised RNA-Seq-Based Genome Annotation with GeneMark-ET and  
33  
34  
35 608 AUGUSTUS. *Bioinformatics.* 2016;32:767–9. doi:10.1093/bioinformatics/btv661.  
36  
37
- 38 609 26. Boutet E, Lieberherr D, Tognolli M, Schneider M, Bansal P, Bridge AJ, et al.  
39  
40 610 UniProtKB/Swiss-Prot, the Manually Annotated Section of the UniProt  
41  
42 611 KnowledgeBase: How to Use the Entry View. *Methods Mol Biol.* 2016;1374:23–54.  
43  
44 612 doi:10.1007/978-1-4939-3167-5\_2.  
45  
46  
47  
48
- 49 613 27. Buchfink B, Xie C, Huson DH. Fast and sensitive protein alignment using  
50  
51 614 DIAMOND. *Nat Methods.* 2015;12:59–60. doi:10.1038/nmeth.3176.  
52  
53  
54
- 55 615 28. Emms DM, Kelly S. OrthoFinder: solving fundamental biases in whole genome  
56  
57 616 comparisons dramatically improves orthogroup inference accuracy. *Genome Biol.*  
58  
59 617 2015;16:157. doi:10.1186/s13059-015-0721-2.  
60  
61

- 1  
2  
3  
4  
5  
6  
7  
8  
9  
10  
11  
12  
13  
14  
15  
16  
17  
18  
19  
20  
21  
22  
23  
24  
25  
26  
27  
28  
29  
30  
31  
32  
33  
34  
35  
36  
37  
38  
39  
40  
41  
42  
43  
44  
45  
46  
47  
48  
49  
50  
51  
52  
53  
54  
55  
56  
57  
58  
59  
60  
61  
62  
63  
64  
65
- 618 29. Coghlan A, Fiedler TJ, McKay SJ, Flicek P, Harris TW, Blasiar D, et al. nGASP--  
619 the nematode genome annotation assessment project. BMC Bioinformatics.  
620 2008;9:549. doi:10.1186/1471-2105-9-549.
- 621 30. Koutsovoulos G, Kumar S, Laetsch DR, Stevens L, Daub J, Conlon C, et al. No  
622 evidence for extensive horizontal gene transfer in the genome of the tardigrade  
623 *Hypsibius dujardini*. Proc Natl Acad Sci USA. 2016;113:5053–8.  
624 doi:10.1073/pnas.1600338113.
- 625 31. Yoshida Y, Koutsovoulos G, Laetsch DR, Stevens L, Kumar S, Horikawa DD, et  
626 al. Comparative genomics of the tardigrades *Hypsibius dujardini* and *Ramazzottius*  
627 *varieornatus*. PLoS Biol. 2017;15:e2002266. doi:10.1371/journal.pbio.2002266.
- 628 32. Baskaran P, Rödelsperger C, Prabh N, Serobyann V, Markov GV, Hirsekorn A, et  
629 al. Ancient gene duplications have shaped developmental stage-specific expression  
630 in *Pristionchus pacificus*. BMC Evol Biol. 2015;15:185. doi:10.1186/s12862-015-0466-  
631 2.
- 632 33. Prabh N, Rödelsperger C. Are orphan genes protein-coding, prediction artifacts,  
633 or non-coding RNAs? BMC Bioinformatics. 2016;17:226. doi:10.1186/s12859-016-  
634 1102-x.
- 635 34. Kergunteuil A, Bakhtiari M, Formenti L, Xiao Z, Defosse E, Rasmann S. Biological  
636 Control beneath the Feet: A Review of Crop Protection against Insect Root Herbivores.  
637 Insects. 2016;7. doi:10.3390/insects7040070.
- 638 35. Ali F, Wharton DA. Cold tolerance abilities of two entomopathogenic nematodes,  
639 *Steinernema feltiae* and *Heterorhabditis bacteriophora*. Cryobiology. 2013;66:24–9.  
640 doi:10.1016/j.cryobiol.2012.10.004.

- 641 36. NCBI blast executables. <ftp://ftp.ncbi.nlm.nih.gov/blast/executables/blast+/2.6.0/>.  
1  
2
- 3 642 37. Boratyn GM, Camacho C, Cooper PS, Coulouris G, Fong A, Ma N, et al. BLAST:  
4  
5 643 a more efficient report with usability improvements. *Nucleic Acids Res.* 2013;41 Web  
6  
7  
8 644 Server issue:W29-33. doi:10.1093/nar/gkt282.  
9
- 10  
11 645 38. Sourceforge.net. <https://sourceforge.net/projects/bio-bwa/files/>. Accessed 1 Apr  
12  
13  
14 646 2017.  
15
- 16  
17 647 39. Li H, Durbin R. Fast and accurate short read alignment with Burrows-Wheeler  
18  
19 648 transform. *Bioinformatics.* 2009;25:1754–60. doi:10.1093/bioinformatics/btp324.  
20  
21
- 22  
23 649 40. Li H, Handsaker B, Wysoker A, Fennell T, Ruan J, Homer N, et al. The Sequence  
24  
25 650 Alignment/Map format and SAMtools. *Bioinformatics.* 2009;25:2078–9.  
26  
27 651 doi:10.1093/bioinformatics/btp352.  
28  
29
- 30  
31 652 41. Tarailo-Graovac M, Chen N. Using RepeatMasker to identify repetitive elements  
32  
33 653 in genomic sequences. *Curr Protoc Bioinformatics.* 2009;Chapter 4:Unit 4.10.  
34  
35 654 doi:10.1002/0471250953.bi0410s25.  
36  
37
- 38  
39 655 42. Dobin A, Davis CA, Schlesinger F, Drenkow J, Zaleski C, Jha S, et al. STAR:  
40  
41 656 ultrafast universal RNA-seq aligner. *Bioinformatics.* 2013;29:15–21.  
42  
43 657 doi:10.1093/bioinformatics/bts635.  
44  
45
- 46  
47 658 43. Dobin A, Gingeras TR. Optimizing RNA-Seq Mapping with STAR. *Methods Mol*  
48  
49 659 *Biol.* 2016;1415:245–62. doi:10.1007/978-1-4939-3572-7\_13.  
50  
51
- 52  
53 660 44. Gremme G, Steinbiss S, Kurtz S. GenomeTools: a comprehensive software library  
54  
55 661 for efficient processing of structured genome annotations. *IEEE/ACM Trans Comput*  
56  
57 662 *Biol Bioinform.* 2013;10:645–56. doi:10.1109/TCBB.2013.68.  
58  
59  
60  
61

663 45. Laetsch D. plot\_GCAG\_counts.R .  
1  
2 664 [https://github.com/DRL/mclean2017/tree/master/analysis/splice\\_sites](https://github.com/DRL/mclean2017/tree/master/analysis/splice_sites).  
3  
4  
5 665 46. Quinlan AR, Hall IM. BEDTools: a flexible suite of utilities for comparing genomic  
6  
7  
8 666 features. *Bioinformatics*. 2010;26:841–2. doi:10.1093/bioinformatics/btq033.  
9  
10  
11 667 47. Huang Y, Niu B, Gao Y, Fu L, Li W. CD-HIT Suite: a web server for clustering and  
12  
13  
14 668 comparing biological sequences. *Bioinformatics*. 2010;26:680–2.  
15  
16 669 doi:10.1093/bioinformatics/btq003.  
17  
18  
19 670 48. WormBase ParasiteSite version 8.  
20  
21  
22 671 <ftp://ftp.ebi.ac.uk/pub/databases/wormbase/parasite/releases/WBPS8/>. Accessed 2  
23  
24 672 April 2017.  
25  
26  
27 673 49. GenomeHubs.org. <http://ensembl.caenorhabditis.org/index.html>. Accessed 2 Apr  
28  
29 674 2017.  
30  
31  
32  
33 675 50. Laetsch DR, Blaxter ML. KinFin: Software for Taxon-Aware Analysis of Clustered  
34  
35  
36 676 Protein Sequences. *G3 (Bethesda)*. 2017;7:3349–57. doi:10.1534/g3.117.300233.  
37  
38  
39 677 51. Finn RD, Attwood TK, Babbitt PC, Bateman A, Bork P, Bridge AJ, et al. InterPro in  
40  
41  
42 678 2017-beyond protein family and domain annotations. *Nucleic Acids Res*.  
43  
44 679 2017;45:D190–9. doi:10.1093/nar/gkw1107.  
45  
46  
47 680 52. Tange O. GNU Parallel - The Command-Line Power Tool. *login: The USENIX*  
48  
49 681 *Magazine*. 2011;36:42–7.  
50  
51  
52  
53 682 53. Katoh K, Standley DM. MAFFT multiple sequence alignment software version 7:  
54  
55  
56 683 improvements in performance and usability. *Mol Biol Evol*. 2013;30:772–80.  
57  
58 684 doi:10.1093/molbev/mst010.  
59  
60  
61

- 685 54. Dress AWM, Flamm C, Fritsch G, Grünwald S, Kruspe M, Prohaska SJ, et al.  
1  
2 686 Noisy: identification of problematic columns in multiple sequence alignments.  
3  
4  
5 687 Algorithms Mol Biol. 2008;3:7. doi:10.1186/1748-7188-3-7.  
6  
7  
8 688 55. Stamatakis A. RAxML-VI-HPC: maximum likelihood-based phylogenetic analyses  
9  
10 689 with thousands of taxa and mixed models. Bioinformatics. 2006;22:2688–90.  
11  
12  
13 690 doi:10.1093/bioinformatics/btl446.  
14  
15  
16 691 56. Kocot KM, Citarella MR, Moroz LL, Halanych KM. PhyloTreePruner: A  
17  
18 692 Phylogenetic Tree-Based Approach for Selection of Orthologous Sequences for  
19  
20  
21 693 Phylogenomics. Evol Bioinform Online. 2013;9:429–35. doi:10.4137/EBO.S12813.  
22  
23  
24 694 57. Kück P, Meusemann K. FASconCAT: Convenient handling of data matrices. Mol  
25  
26  
27 695 Phylogenet Evol. 2010;56:1115–8. doi:10.1016/j.ympev.2010.04.024.  
28  
29  
30 696 58. Huson DH, Scornavacca C. Dendroscope 3: an interactive tool for rooted  
31  
32 697 phylogenetic trees and networks. Syst Biol. 2012;61:1061–7.  
33  
34  
35 698 doi:10.1093/sysbio/sys062.  
36  
37  
38 699 59. Sandhu SK, Jagdale GB, Hogenhout SA, Grewal PS. Comparative analysis of  
39  
40  
41 700 the expressed genome of the infective juvenile entomopathogenic nematode,  
42  
43 701 *Heterorhabditis bacteriophora*. Mol Biochem Parasitol. 2006;145:239–44.  
44  
45  
46 702 doi:10.1016/j.molbiopara.2006.01.002.  
47  
48  
49 703 60. Hao Y-J, Montiel R, Lucena MA, Costa M, Simoes N. Genetic diversity and  
50  
51 704 comparative analysis of gene expression between *Heterorhabditis bacteriophora*  
52  
53 705 Az29 and Az36 isolates: uncovering candidate genes involved in insect  
54  
55  
56 706 pathogenicity. Exp Parasitol. 2012;130:116–25. doi:10.1016/j.exppara.2011.12.001.  
57  
58  
59 707 61. Boguski MS, Lowe TM, Tolstoshev CM. dbEST--database for “expressed  
60  
61

708 sequence tags". Nat Genet. 1993;4:332–3. doi:10.1038/ng0893-332.

709 62. McLean F, Berger D, Laetsch DR, Schwartz HT, Blaxter M. Revised gene  
710 annotations for the entemopathogenic nematode, *Heterorhabditis bacteriophora*.

711 Zenodo data repository. 10.5281/zenodo.1169646 .

712

## 713 **Figures and Legends**

### 714 **Figure 1. Taxon-annotated GC-coverage plot of the *H. bacteriophora* assembly.**

715 Bottom left panel: Each scaffold or contig is represented by a single filled circle. Each  
716 scaffold is placed in the main panel based on its GC proportion (X axis) and coverage  
717 by reads from the Illumina re-sequencing project (Y axis). The fill colour of the circle  
718 indicates the taxon of the top BLASTn hit in the NCBI nt database for that scaffold.  
719 The colours are annotated in the top right hand key, which indicates taxon assignment  
720 and (in brackets) the number of contigs and scaffolds so assigned, their total span,  
721 and their N50 length. The circles are scaled to scaffold length, as indicated in the key  
722 at the base of the main panel.

723 Right panel: Nucleotide span in kb at each coverage level.

724 Top panel: Nucleotide span in kb at each GC proportion.

725

### 726 **Figure 2. Comparisons of BRAKER1/soft-masked and original gene predictions** 727 **from *H. bacteriophora***

728 (A, B) Frequency histograms of intron count (A) and protein length (B) in  
729 BRAKER1/soft-masked (blue) and published (yellow) protein coding gene predictions.



1 730 Outlying proteins longer than >2500 amino-acids (n=40) or genes containing >60  
2 731 introns (n=20) are not shown.

3  
4  
5 732 (C) Frequency histogram of the proportion of each BRAKER1 gene prediction  
6 overlapped by a published gene prediction at the nucleotide level.  
7

8 733  
9  
10  
11 734 (D) Comparison of singleton, proteome-specific, and shared proteins in the published  
12 and BRAKER1/soft-masked protein sets.  
13

14 735  
15  
16 736 (E) Counts of non-canonical GC/AG introns in gene predictions from the published  
17 and BRAKER1 *H. bacteriophora* gene sets, and the model nematode  
18  
19 737 *Caenorhabditis elegans* (WS258). Counts are of genes containing at least one non-  
20  
21 738 canonical GC/AG intron with the specified number of non-canonical introns.  
22  
23  
24 739

25  
26  
27 740

28  
29  
30 741 **Figure 3. Maximum likelihood phylogeny of selected rhabditine (Clade V)**  
31 **nematodes.**  
32  
33 742

34  
35  
36 743 A supermatrix of aligned amino acid sequences from orthologous loci from both *H.*  
37 *bacteriophora* predictions and a set of 23 rhabditine (Clade V) nematodes (see  
38  
39 744 Supporting Data: *Orthofinder\_analysis*) were aligned and analysed with RaxML using  
40  
41 745 a PROTGAMMAGTR amino-acid substitution model. *Pristionchus* spp. were  
42  
43 746 designated as the outgroup. Bootstrap support values (100 bootstraps performed)  
44  
45 747 were 100 for all branches except one.  
46  
47 748  
48  
49  
50  
51  
52  
53  
54  
55  
56  
57  
58  
59  
60  
61

749 **Tables**

750 **. Contamination screening of the *H. bacteriophora* assembly**

| <i>Number of scaffolds</i> | <i>Sum of scaffold spans (bp)</i> | <i>Mean coverage *</i> | <i>Best matches in NCBI nt database</i>                                    | <i>Assignment</i>                                                                            |
|----------------------------|-----------------------------------|------------------------|----------------------------------------------------------------------------|----------------------------------------------------------------------------------------------|
| 12                         | 99556                             | 2.8                    | <i>Stenotrophomonas maltophilia</i> genome                                 | bacterial culture contaminant **                                                             |
| 4                          | 4709                              | 0.1                    | <i>Photorhabdus sp.</i> genomes                                            | symbiont culture contaminant **                                                              |
| 2                          | 2144                              | 756.0                  | poorly annotated mitochondrial matches                                     | <i>H. bacteriophora</i> mitochondrial fragments                                              |
| 22                         | 3051844                           | 69.6                   | mariner transposons in Metazoa, especially Hymenoptera and Platyhelminthes | <i>H. bacteriophora</i> nuclear genome mariner transposon family (highest coverage 960-fold) |
| 10                         | 334100                            | 76.6                   | low score match to several histone H3.3 across Metazoa                     | <i>H. bacteriophora</i> nuclear sequence                                                     |
| 7                          | 713932                            | 56.5                   | chance nucleotide matches to conserved genes in other taxa                 | <i>H. bacteriophora</i> nuclear sequences                                                    |

751

752 \* The average read coverage of the whole assembly was 85.3.

753 \*\* These scaffolds were removed by the low-coverage filter.

754

755

756

757 **Table 2. Comparison of the published and BRAKER1/soft-masked protein**  
 758 **coding gene predictions.**

| <i>Prediction set</i>                                        | <i>Published [14]</i> | <i>BRAKER1/soft-masked</i> |
|--------------------------------------------------------------|-----------------------|----------------------------|
| Number of protein coding genes predicted                     | 20964                 | 1,5747                     |
| Mean protein length (amino acids)                            | 218.8                 | 344.5                      |
| Number of single exon genes                                  | 1728                  | 2326                       |
| Mean number of exons per gene*                               | 5.9                   | 7.8                        |
| Proportion of non-canonical (GC-AG) introns                  | 8.87%                 | 0.79%                      |
| Percentage mapping to publicly available transcriptome reads |                       |                            |
| <i>Sanger ESTs</i>                                           | 80.45%                | 84.26%                     |
| <i>Roche 454 reads</i>                                       | 37.18%                | 58.03%                     |
| BUSCO score for proteome                                     |                       |                            |
| <i>Complete</i>                                              | 47.8%                 | 94%                        |
| <i>Fragmented</i>                                            | 34.7%                 | 4.3%                       |
| Number of proteins with no hits in Uniref90                  | 8,962                 | 2,889                      |
| Protein singletons in clustering                             | 5442                  | 1112                       |
| Conserved, single-copy orthologues**                         |                       |                            |
| <i>Total</i>                                                 | 2089                  | 2330                       |
| <i>Missing</i>                                               | 377                   | 141                        |
| <i>Expanded</i>                                              | 184                   | 84                         |

759  
 760 \* Number of exons: number of coding DNA sequence (CDS) entries per gene for  
 761 BRAKER1 predictions. CDS features, not exons are outputted by AUGUSTUS in GFF  
 762 files.

763 \*\* The list of strict one-to-one orthologues was augmented with protein clusters where  
 764 75% of species had single copy representatives (“fuzzy-1-to-1” orthologues identified  
 765 by KinFin).

766

767

1

2

3 768

4

5

6

7 769

## Supplementary Files

8

9

10 770

**Supplementary file 1: BRAKER1 and JIGSAW annotation pipelines.**

11

12

13 771

Figure illustrating the differences between the BRAKER1 and the Bai et al 2013

14

15 772

JIGSAW prediction methods used for *Heterorhabditis bacteriophora*. PDF file.

16

17

18

19 773

**Supplementary file 2: Methods Supplementary Note**

20

21

22 774

A note detailing the command lines used in the generation of the BRAKER1 gene

23

24

25 775

predictions, and the associated analysis. PDF file.

26

27

28 776

## Supporting Data

29

30

31 777

The Supporting Data [24, 62], for this work is described below:

32

33

34

35 778

**augustus.aa:** BRAKER1/soft-masked annotations of *Heterorhabditis bacteriophora*.

36

37

38 779

The amino acid sequences of the protein predictions in FASTA format.

39

40

41 780

**augustus.gff:** BRAKER1/soft-masked annotations of *Heterorhabditis bacteriophora*.

42

43 781

The GFF format file.

44

45

46 782

**augustus.gtf:** BRAKER1/soft-masked annotations of *Heterorhabditis bacteriophora*.

47

48

49 783

The GTF format file.

50

51

52 784

**augustus.hm.aa:** BRAKER1/hard-masked annotations of *Heterorhabditis*

53

54

55 785

*bacteriophora*. The amino acid sequences of the protein predictions in FASTA format.

56

57

58

59

60

61

62

63

64

65

1  
2  
3  
4  
5  
6  
7  
8  
9  
10  
11  
12  
13  
14  
15  
16  
17  
18  
19  
20  
21  
22  
23  
24  
25  
26  
27  
28  
29  
30  
31  
32  
33  
34  
35  
36  
37  
38  
39  
40  
41  
42  
43  
44  
45  
46  
47  
48  
49  
50  
51  
52  
53  
54  
55  
56  
57  
58  
59  
60  
61  
62  
63  
64  
65

786 **augustus.hm.gff:** BRAKER1/hard-masked annotations of *Heterorhabditis*  
bacteriophora. The GFF format file.

788 **augustus.hm.gtf:** BRAKER1/hard-masked annotations of *Heterorhabditis*  
bacteriophora. The GTF format file.

790 **Blobtools\_coverage\_analysis.txt:** COV file (raw output from the blobology pipeline)  
detailing the base/read coverage of the published assembly with reads from the re-  
sequencing project. Text file.

793 **BRAKER1\_annotation\_comparisons.txt:** Comparison of the BRAKER1/soft-  
masked and BRAKER1/hard-masked gene predictions from *Heterorhabditis*  
bacteriophora. Tab-delimited text file.

796 **Contaminant\_scaffolds.txt:** A list of the scaffolds/contigs identified by contamination  
screening and presented in Table 1. Text file.

798 **EST.acc.txt:** Accession numbers for the publically available ESTs used for the EST  
assembly. Text file.

800 **EST.assembled.fas:** Assembled ESTs derived from the publicly available ESTs  
detailed in EST.acc.txt. FASTA .fas format file.

802 **HBACT\_BRAKER1\_signalPNoTM.txt:** Secretome predictions from the  
BRAKER1/soft-masked predictions. Text file.

804 **HBACT\_published\_signalPNoTM.txt:** Secretome predictions from the published Bai  
et al. (2013) protein predictions. Text file.

806 **Individual\_gene\_alignments:** Alignments of orthogroups used to build the  
supermatrix. Directory of aligned sequences in fasta format.

808 **IPR.domain.analysis.txt:** Comparative Interproscan statistics. Text file.

809 **kinfin.zip:** KinFin analyses from the OrthoFinder analyses of Heterorhabditis  
bacteriophora predicted proteomes. Zipped archive (42.6 Mb).

811 **Low\_coverage\_scaffolds.txt:** Scaffolds and contigs removed from the  
Heterorhabditis bacteriophora assembly because of low coverage in the new whole  
genome sequencing dataset. Text file.

814 **Newick\_tree.txt:** Phylogenetic analysis output files. NEWICK format text file.

815 **Orthofinder.zip:** The OrthoFinder output files. A zipped archive of the three  
OrthoFinder clustering result files (published H. bacteriophora + 23 species;  
BRAKER1/soft-masked + 23 species: published + soft-masked + 23 species). Zipped  
archive (20.9 Mb)

819 **Orthogroup\_count\_ratios.txt:** Table with count of orthogroups at each contribution  
ratio from the BRAKER1/soft-masked and published proteomes after clustering with  
23 other Clade V nematodes. Empty cells denote contribution combinations with no  
orthogroups. Text file.

823 **Proteomes\_in\_clustering.txt:** A list of the proteomes included in the OrthoFinder  
analyses. Text file.

825 **Publicly\_available\_assembly\_details.txt:** Details of the published, publicly  
available Heterorhabditis bacteriophora genome assembly re-analysed in this study  
using BRAKER1. Text file.

828 **Scaffolds\_included.txt:** Scaffolds and contigs in the Heterorhabditis bacteriophora  
assembly included in re-annotation and further analysis. Text file.

- 830 **Secretome.analysis.txt:** Secretome statistics for 23 Clade V nematodes. Text file.
- 1  
2
- 3 831 **Short\_BRAKER1\_genes\_list.txt:** List of *Heterorhabditis bacteriophora* proteins of  
4  
5 length <30 amino acids excluded from the OrthoFinder analyses. Text file  
6 832  
7  
8  
9 833 **Supermatrix.fas:** Supermatrix of aligned sequences. FASTA .fas format file.
- 10  
11  
12  
13  
14  
15  
16  
17  
18  
19  
20  
21  
22  
23  
24  
25  
26  
27  
28  
29  
30  
31  
32  
33  
34  
35  
36  
37  
38  
39  
40  
41  
42  
43  
44  
45  
46  
47  
48  
49  
50  
51  
52  
53  
54  
55  
56  
57  
58  
59  
60  
61  
62  
63  
64  
65

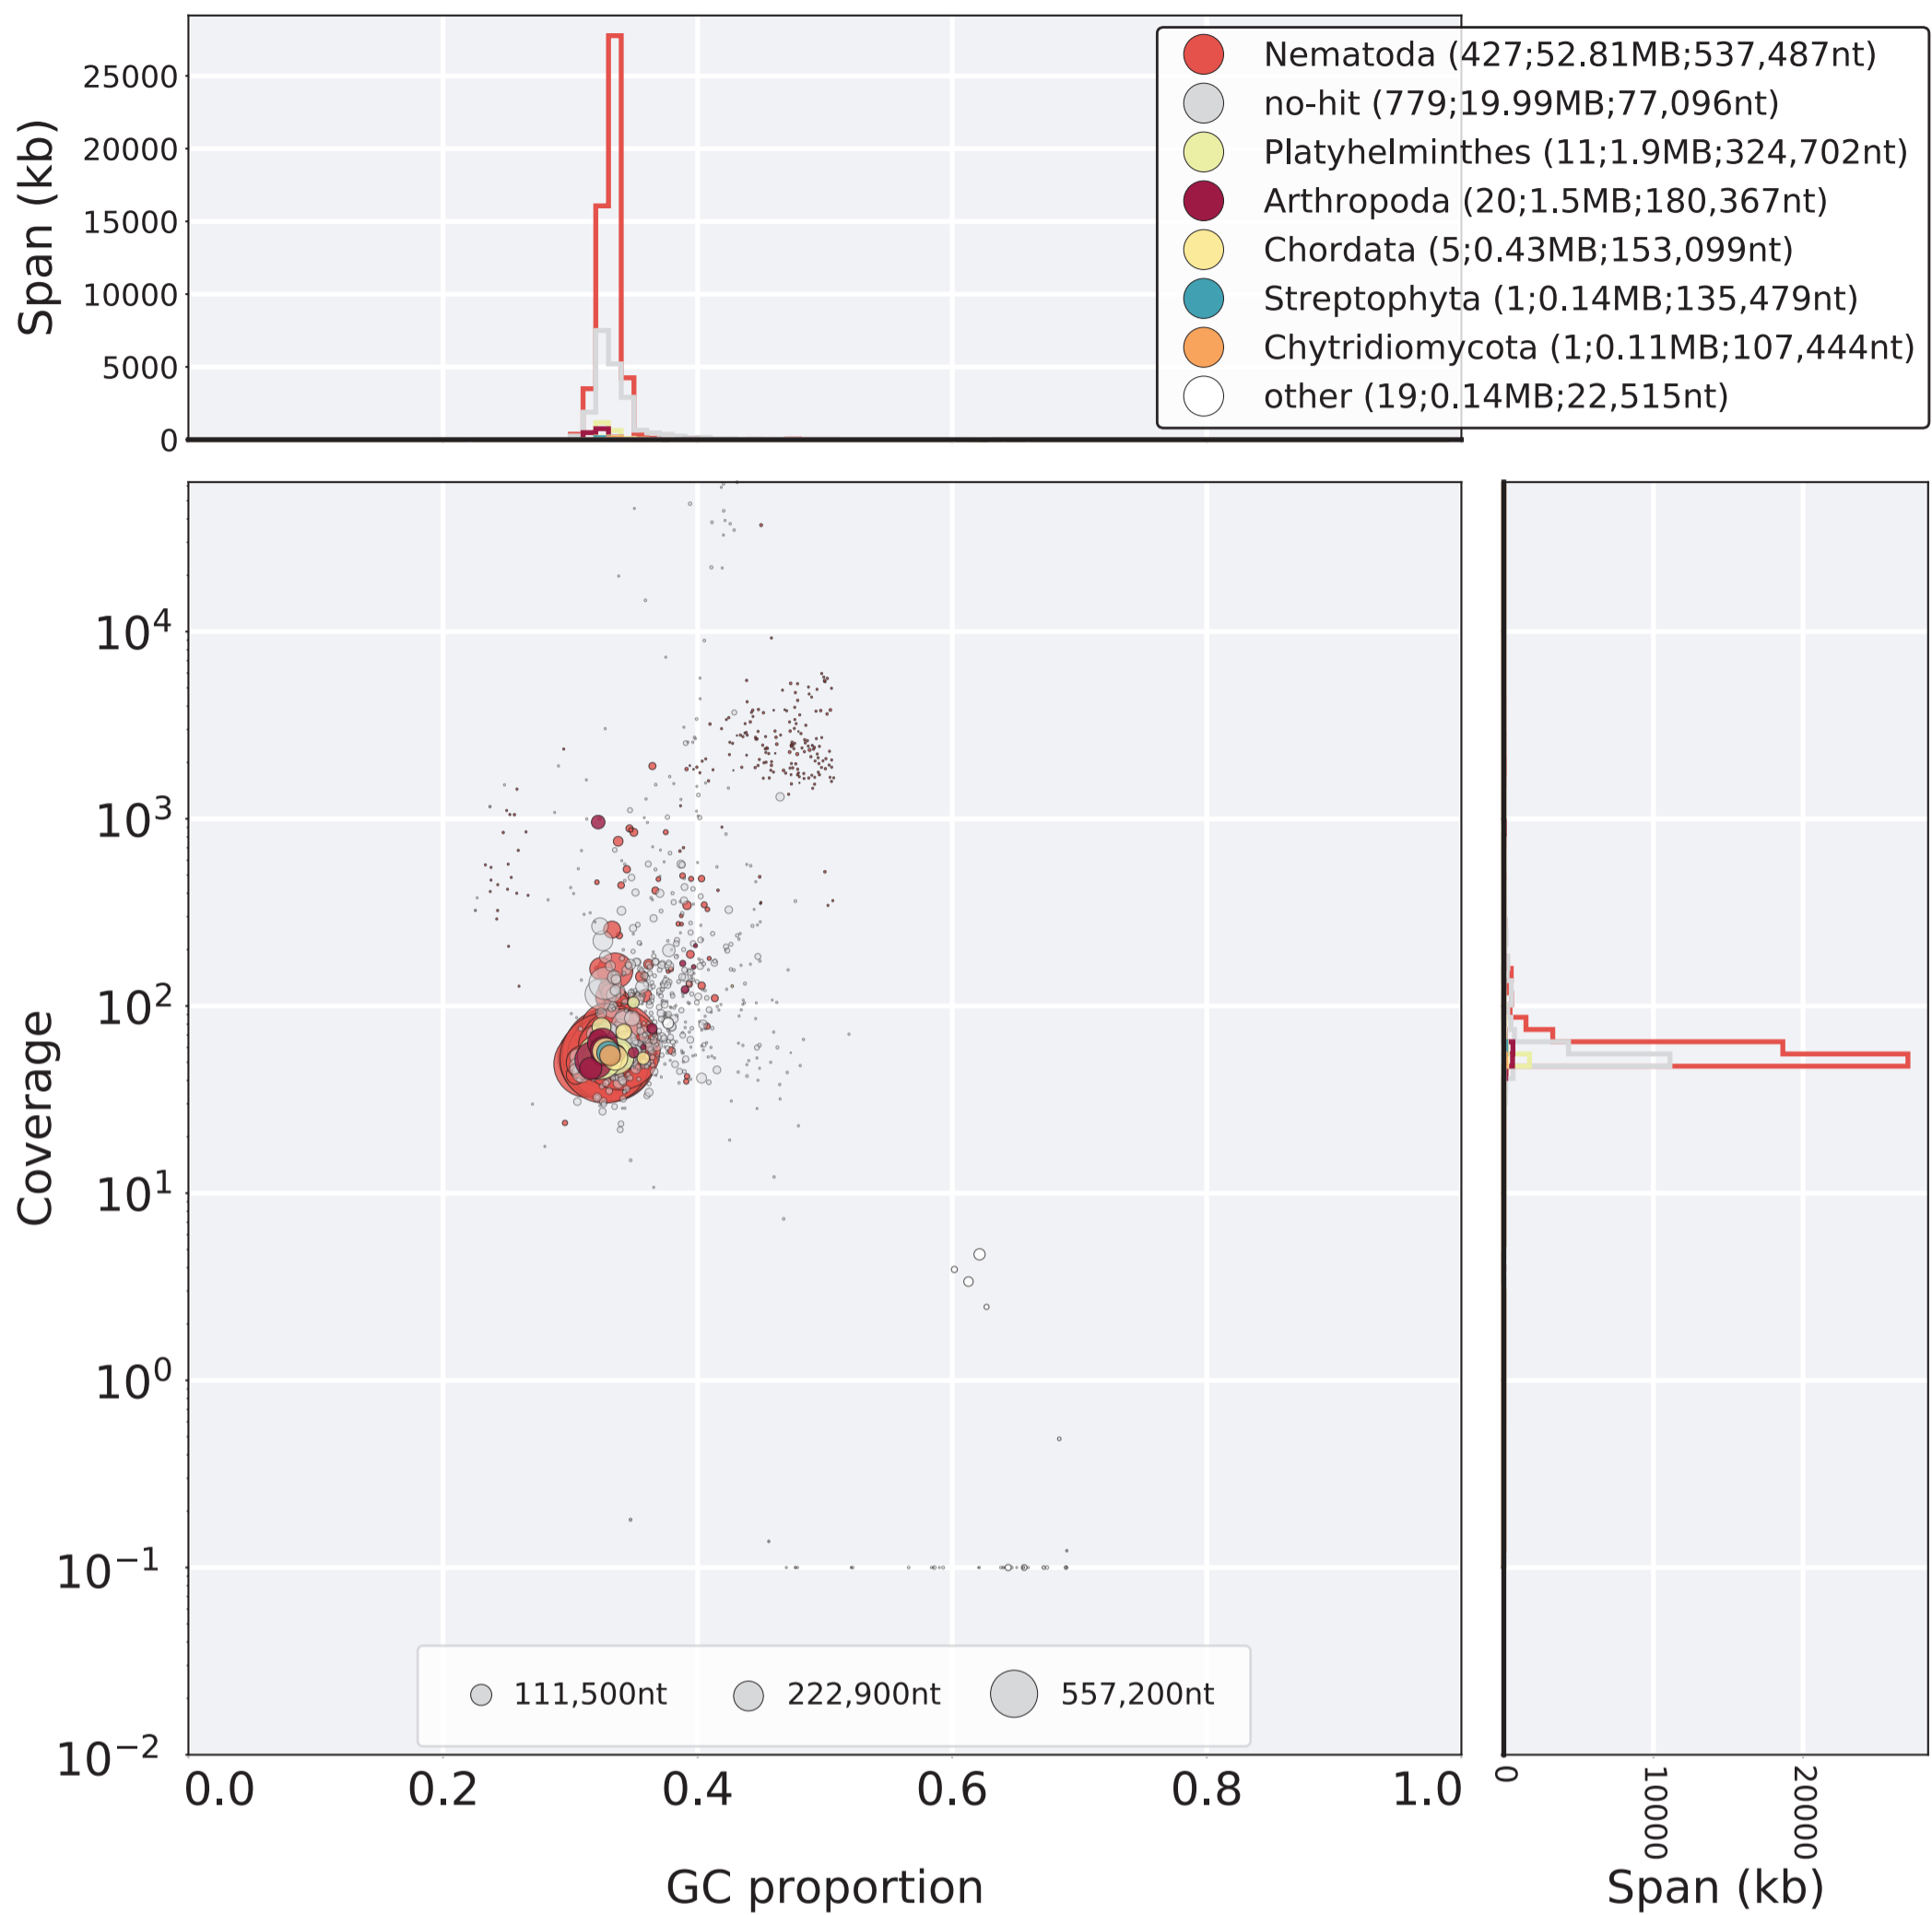



Figure 2

[Click here to download Figure Figure\\_2.pdf](#)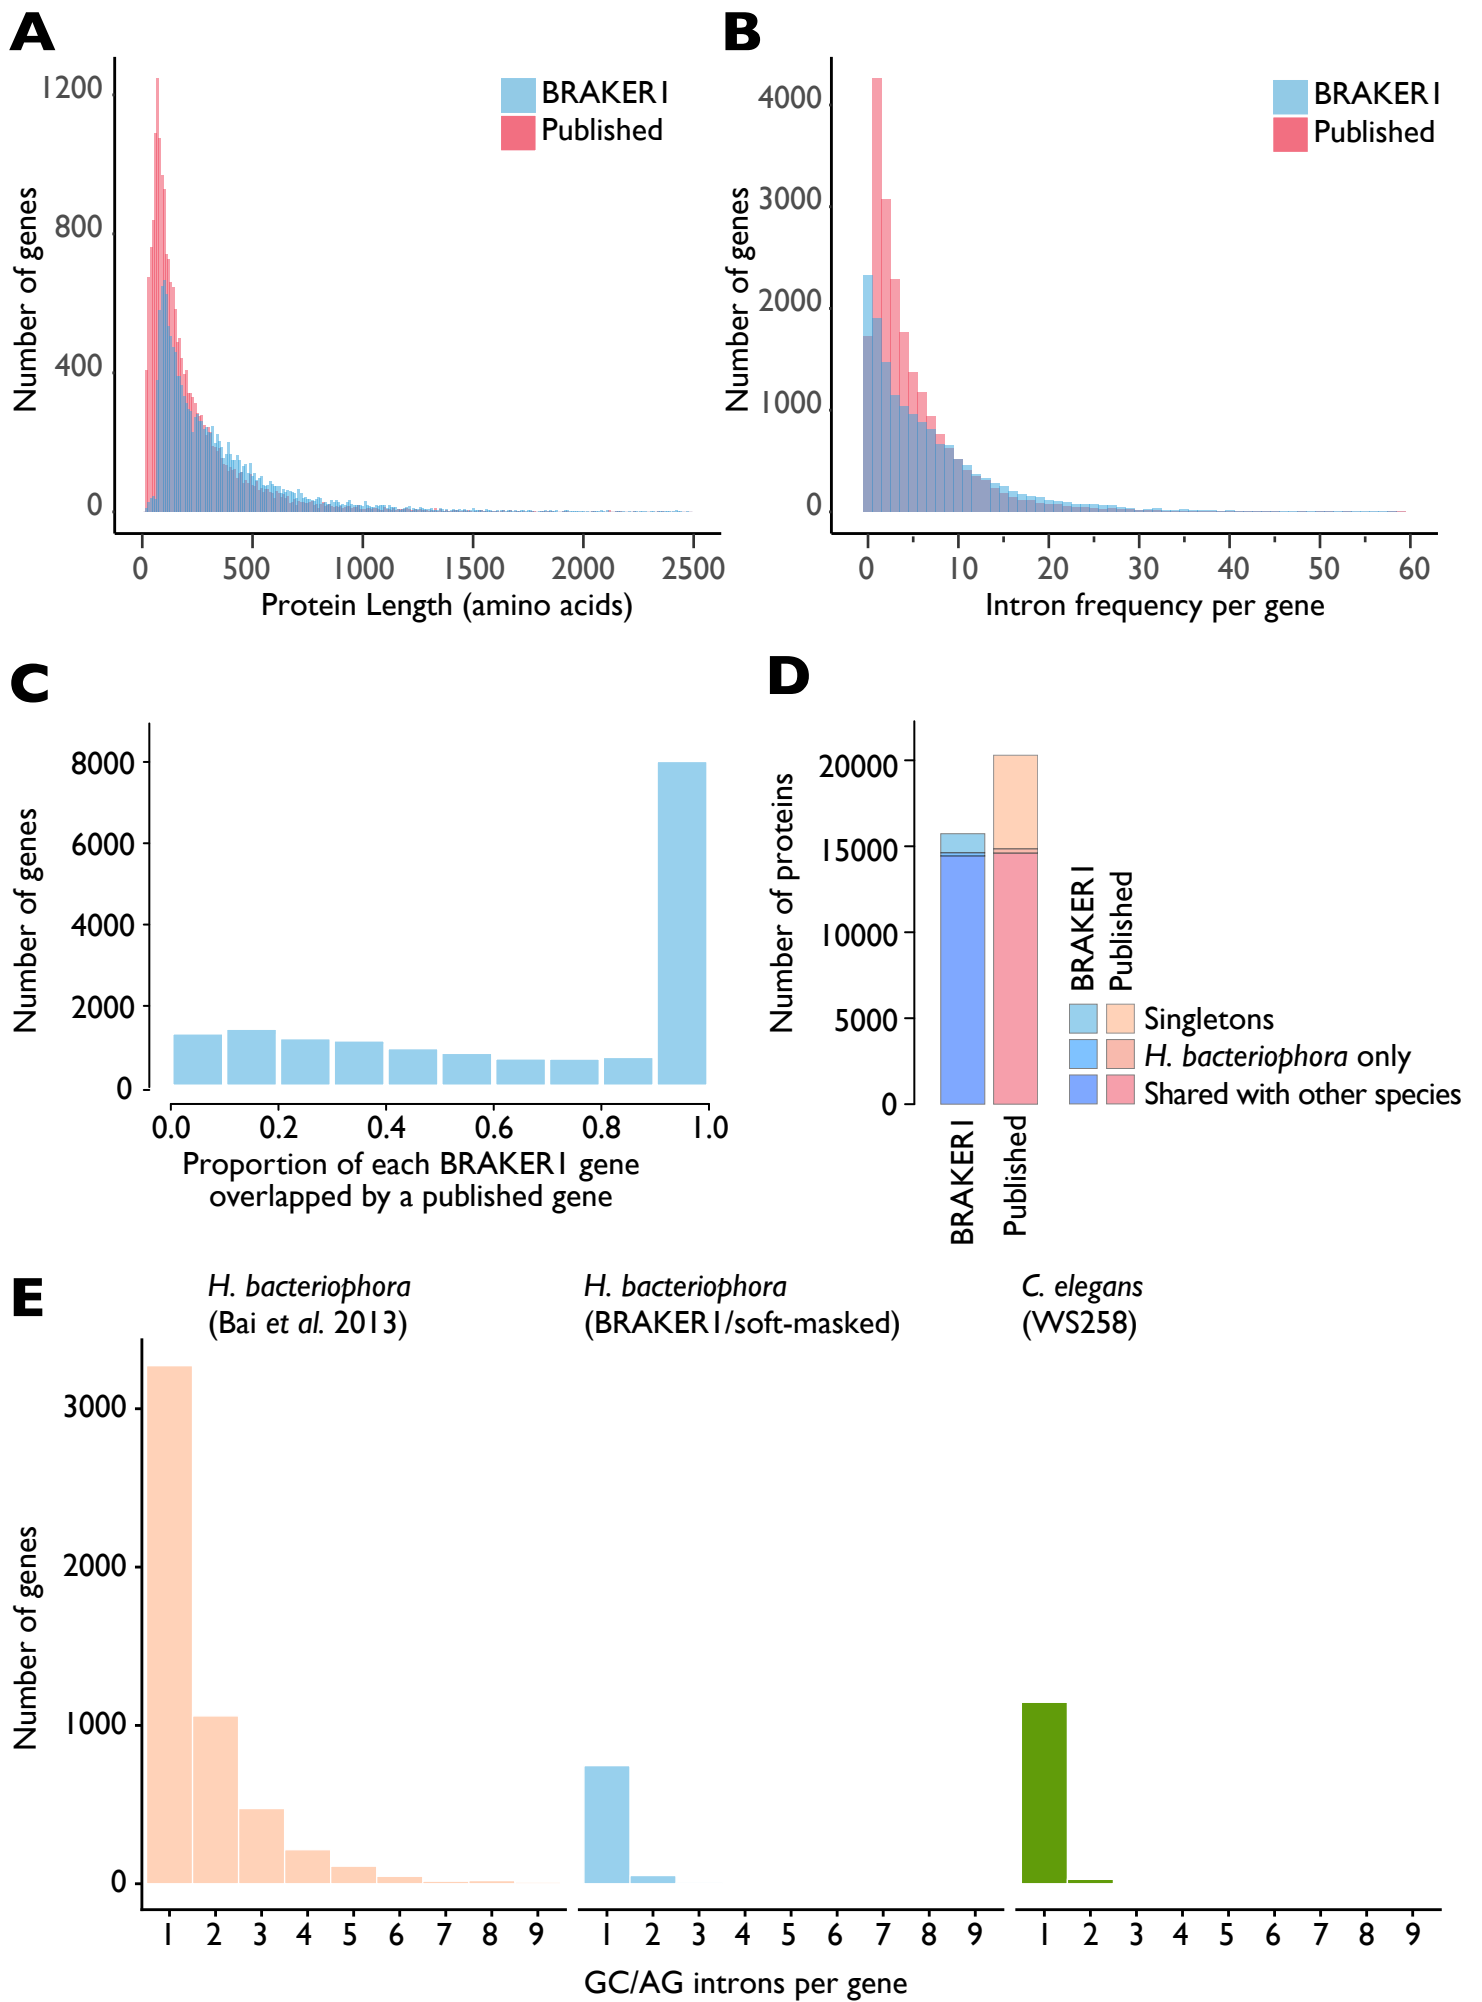

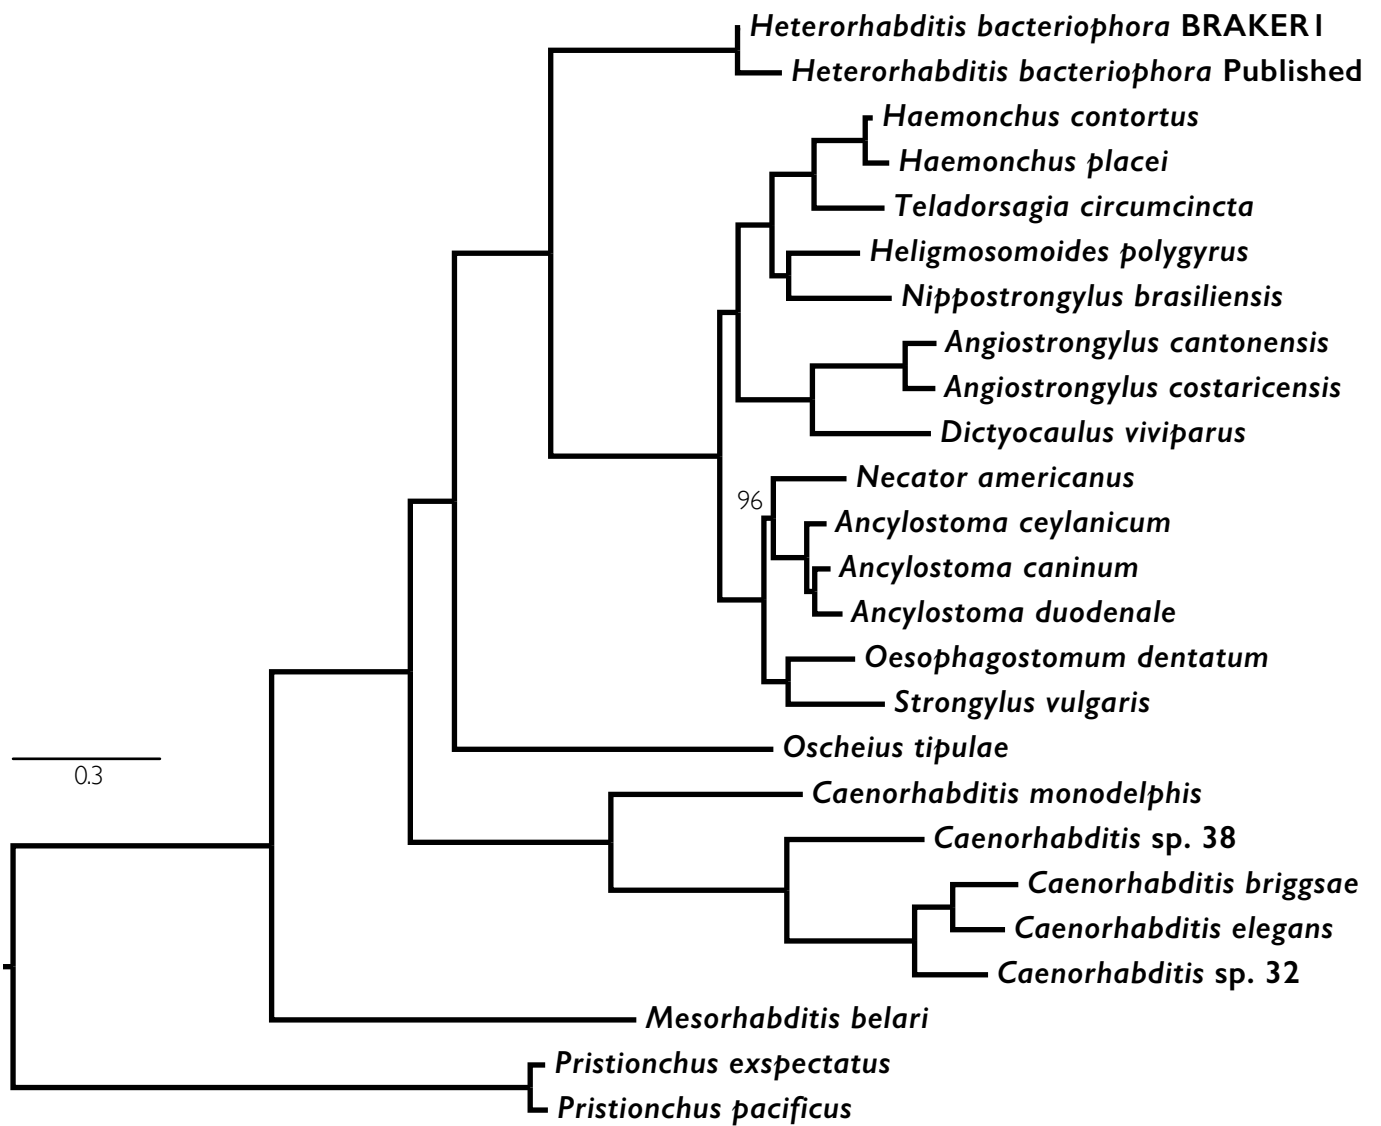

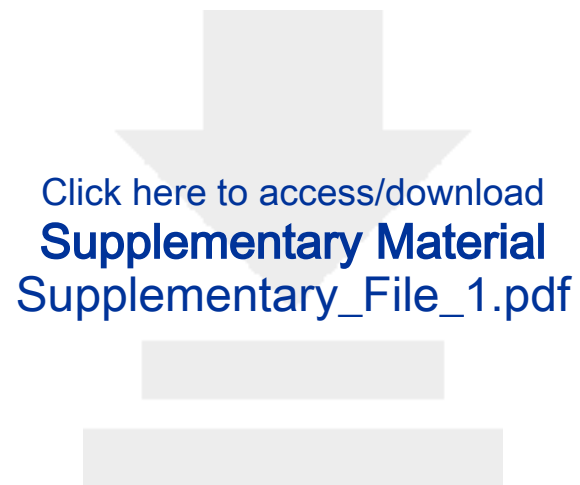



Click here to access/download  
**Supplementary Material**  
Supplementary\_File\_2.docx



Supplement: giy034_giga-d-17-00297_revision_1.pdf [file giy034_giga-d-17-00297_revision_1.pdf]
